# Supplementary material for: Plasma microRNA signature in presymptomatic and symptomatic subjects with C9orf72-associated frontotemporal dementia and amyotrophic lateral sclerosis
Source: PubMed Central journal article supplement — J Neurol Neurosurg Psychiatry. 2020 Nov 25;92(5):485–93. doi: 10.1136/jnnp-2020-324647 (PMC8053348; doi:10.1136/jnnp-2020-324647), 2020-11-25
Supplement: jnnp-2020-324647supp001.pdf [file jnnp-2020-324647supp001.pdf]

## SUPPLEMENTARY MATERIAL

**Appendix A1:** Neuropsychological protocol.

**Appendix A2:** Description of the four cases at the transitional stage.

**Table A1:** Clinical status and center proportion in each batch.

**Table A2:** Complete output from EdgeR.

**Table A3:** List of the putative target genes.

**Table A4:** Complete output from DIANA-miRPath v.3.

**Table A5:** Comparison of studies investigating miRNAs from brain samples.

**Figure A1:** Stratified nested cross-validation.

**Figure A2:** Expression heatmap of miRNA signature.

**Figure A3:** Bootstrapped ROC AUC scores.

**Figure A4:** ROC AUC scores with 100 different fold splits.

**Figure A5:** Presymptomatic subjects probability scores.

**Figure A6:** Heatmap of the level of enrichment in KEGG pathways.

## **Appendix A1. Neuropsychological protocol**

The PREV-DEMALS cognitive evaluation included standardized neuropsychological tests to investigate all cognitive domains, and in particular frontal lobe functions. The scores were provided previously (Bertrand et al., 2018).

Briefly, global cognitive efficiency was evaluated by means of Mini-Mental State Examination (MMSE) and Mattis Dementia Rating Scale (MDRS). Frontal executive functions were assessed with Frontal Assessment Battery (FAB), forward and backward digit spans, Trail Making Test part A and B (TMT-A and TMT-B), Wisconsin Card Sorting Test (WCST), and Symbol-Digit Modalities test. Hayling Sentence Completion Test was used to assess cognitive inhibition. Ekman faces test and Faux-pas test evaluated emotional assessment and social cognition.

Episodic verbal memory was assessed with the Free and Cued Selective Reminding Test (FCSRT), whereas visual memory with the Benson figure recall and identification test. Boston Naming Test (BNT), phonological and semantic fluencies, and Camel & Cactus test were used to evaluate language skills. Visuospatial abilities were assessed by means of Benson figure copy and the cube analysis task from the Visual Object and Space Perception (VOSP) battery. Limb-kinetic and ideo-motor apraxias were evaluated using a French validated scale.

## Appendix A2. Description of the four cases at the transitional stage

Four *C9orf72* presymptomatic carriers have developed frontal cognitive and/or behavioral changes and/or subtle motor signs/symptoms during a 3-year follow-up period, without fitting diagnostic criteria for FTD or ALS, suggesting they were in the transitional ‘prodromal’ phase at the moment of or just after their baseline visit. They are described below.

The case 1 was a right-handed 42-year-old female with 13 years of schooling. Neurological examination, behavioral scores (FBI: 0; AES 9/42), and cognitive scores were normal (MDRS 138/144; FAB 18/18; WCST 20/20; forward/backward digit spans: 7/4), except for isolated moderate decrease of the faux-pas test score (21/30). Ekman test score was normal (31/35). At follow-up three years later (45 years), cognitive scores exhibited attentional deficit (forward/backward digit spans: 5/3), perseverations and social cognition deficit (faux-pas test 21/30). The Ekman score was 28/35. Neurological examination revealed upper and lower limbs brisk reflexes with propagation of reflexes.

The case 2 was a left-handed 47-year-old male with 15 years of education. When included in the study, neurological examination and behavior evaluation were normal. Cognitive scores (MMSE: 30; MDRS 134/144; WCST: 20/20) and behavioral scores (FBI: 4; AES score: 2) were normal except for mild impairment of social cognition (faux-pas test: 19/30). The frontal adapted version of CDR®+NACC-FTLD scored 0.5 at baseline. At clinical follow-up evaluation, three years later (50 years), he exhibited inappropriate familiarity and joviality, without any other behavioral changes. The AES score mildly increased (9/42) and the CDR®+NACC-FTLD reached a score of 1.0. Cognitive tests revealed attentional deficit (forward/backward digit spans: 5/3), slow processing of information and decline in several cognitive scores, among which MDRS (130/144) and faux-pas test (18/30). Motor evaluation revealed cramps and rare fasciculations.

The case 3 was a right-handed 69-year-old male with 11 years of schooling. At inclusion, neurological and behavioral evaluations were normal (FBI: 6/42; AES: 13). MDRS

(135/142) and WCST (18/20) were normal but executive dysfunction (FAB: 12/18) and social cognition deficit (faux-pas test: 18/30, Ekman 29/35) were present. Two years later, he presented loss of interests and apathy (AES 19, cut-off >13), irritability, familiarity and disinhibition (FBI: 12), and imitation behavior. Cognitive tests exhibited attentional (forward/backward digit spans: 3/3) and planning difficulties. The WCST was scored 9/20. Scores of MDRS, FAB, and faux-pas test were stable. Ekman score was 26/35. Motor examination was normal.

The case 4 was a right-handed female of high education level (17 years). She was included in the study at age 64. Neurological examination was normal at inclusion, as well as behavior. The FBI scored 0 and the AES scored 8. Cognitive scores were within normal ranges or just above the lower limits according to her age. MDRS scored 138/144, MMSE 26/30 (2 errors in attention subtest) FAB 17/18, WCST 18/20, and TMT was completely normal (0 errors). Reevaluation at age 67, three years after her inclusion in the study, evidenced decline in several cognitive scores, with the occurrence of executive dysfunction, deficit in mental flexibility and perseverations. WCST scored 9/20, MMSE 24/30 and FAB 15/18. She made 10 errors at the TMT. She presented global slowness, scoring 12 at the AES apathy scale. Her relative did not mention any other behavioral disorders (FBI score: 0). At motor evaluation, she exhibited decreased Achilles tendon reflexes, cramps and rare fasciculations never noticed before.

**Table A1. Clinical status and center proportion in each batch**

**Table A1. Number of subjects analyzed in each RNA-seq batch, by clinical status (above) and by center (below).**

| Batch   | Clinical status |                |            | Total     |
|---------|-----------------|----------------|------------|-----------|
|         | Control         | Presymptomatic | Patient    |           |
| Batch 1 | 25 (39.7%)      | 27 (42.9%)     | 11 (17.4%) | 63 (100%) |
| Batch 2 | 9 (37.5%)       | 10 (41.7%)     | 5 (20.8%)  | 24 (100%) |
| Batch 3 | 9 (39.1%)       | 8 (34.8%)      | 6 (26.1%)  | 23 (100%) |

  

| Batch   | Center     |           |           |          | Total     |
|---------|------------|-----------|-----------|----------|-----------|
|         | Paris      | Rouen     | Limoges   | Lille    |           |
| Batch 1 | 51 (81.0%) | 5 (7.9%)  | 5 (7.9%)  | 2 (3.2%) | 63 (100%) |
| Batch 2 | 18 (75%)   | 2 (8.3%)  | 3 (12.5%) | 1 (4.2%) | 24 (100%) |
| Batch 3 | 15 (65.2%) | 3 (13.0%) | 4 (17.4%) | 1 (4.4%) | 23 (100%) |

## Table A2. Complete output from EdgeR

Table A2. Complete output from EdgeR, for each pairwise comparison between clinical groups (control vs. presymptomatic, control vs. patient, presymptomatic vs. patient). The columns show the 589 analyzed miRNAs (above noise level), the log-fold change when comparing the clinical groups, the average log-counts per million, the unadjusted p-values and finally the adjusted p-values after Benjamini-Hochberg.

| miRNA            | log-fold change | log-counts per million            | p-value   | adjusted p-value |
|------------------|-----------------|-----------------------------------|-----------|------------------|
|                  |                 | <b>Control vs. Presymptomatic</b> |           |                  |
| miR-34a-5p       | -1.433          | 4.676                             | 5.251e-16 | 3.093e-13        |
| miR-218-5p       | 1.475           | 1.231                             | 0.000     | 0.081            |
| miR-1250-5p      | -0.310          | 0.691                             | 0.001     | 0.209            |
| miR-625-3p       | 0.495           | 8.394                             | 0.002     | 0.228            |
| miR-548au-5p     | -0.275          | 14.473                            | 0.005     | 0.458            |
| miR-548am-c-o-5p | -0.283          | 14.295                            | 0.005     | 0.458            |
| miR-30e-5p       | -0.153          | 10.655                            | 0.006     | 0.458            |
| miR-1307-5p      | -0.241          | 5.708                             | 0.006     | 0.458            |
| miR-200c-3p      | 0.150           | 5.273                             | 0.007     | 0.458            |
| miR-5010-3p      | 0.206           | 1.408                             | 0.008     | 0.458            |
| miR-17-3p        | -0.238          | 3.215                             | 0.010     | 0.511            |
| miR-361-5p       | 0.124           | 8.171                             | 0.014     | 0.605            |
| miR-199a-5p      | -0.260          | 8.817                             | 0.016     | 0.605            |
| miR-125b-5p      | 0.245           | 8.080                             | 0.017     | 0.605            |
| miR-23b-5p       | 0.327           | 1.691                             | 0.018     | 0.605            |
| miR-548h-5p      | -0.669          | 6.935                             | 0.019     | 0.605            |
| miR-29b-3p       | -0.423          | 9.739                             | 0.022     | 0.605            |
| miR-10a-5p       | 0.179           | 7.108                             | 0.026     | 0.605            |
| miR-23b-3p       | 0.140           | 9.599                             | 0.028     | 0.605            |
| miR-32-5p        | -0.280          | 5.289                             | 0.029     | 0.605            |
| miR-10a-3p       | 0.269           | 1.500                             | 0.030     | 0.605            |
| let-7g-3p        | -0.359          | 0.220                             | 0.031     | 0.605            |
| miR-509-3p       | 0.470           | 2.288                             | 0.032     | 0.605            |
| miR-942-5p       | 0.140           | 4.976                             | 0.033     | 0.605            |
| miR-197-3p       | 0.207           | 6.745                             | 0.033     | 0.605            |
| miR-142-3p       | -0.218          | 13.185                            | 0.033     | 0.605            |
| miR-21-3p        | -0.316          | 3.394                             | 0.034     | 0.605            |
| miR-301a-3p      | -0.186          | 5.377                             | 0.034     | 0.605            |
| miR-4742-3p      | 0.235           | 1.378                             | 0.035     | 0.605            |
| miR-5584-5p      | 0.286           | 0.672                             | 0.037     | 0.605            |
| miR-625-5p       | 0.278           | 6.770                             | 0.038     | 0.605            |
| miR-375          | 0.567           | 2.730                             | 0.038     | 0.605            |
| miR-330-5p       | -0.111          | 3.616                             | 0.041     | 0.605            |
| miR-100-5p       | 0.466           | 2.346                             | 0.041     | 0.605            |
| miR-19a-3p       | -0.286          | 5.810                             | 0.043     | 0.605            |
| miR-101-3p       | -0.227          | 11.459                            | 0.047     | 0.605            |
| miR-582-5p       | -0.498          | 0.885                             | 0.047     | 0.605            |
| miR-27a-3p       | -0.306          | 9.739                             | 0.048     | 0.605            |
| miR-548y         | -1.266          | -0.318                            | 0.055     | 0.605            |
| miR-548aq-3p     | -0.265          | 9.450                             | 0.056     | 0.605            |
| miR-153-3p       | -0.360          | 0.310                             | 0.056     | 0.605            |
| miR-377-5p       | -0.350          | -0.095                            | 0.057     | 0.605            |
| miR-191-5p       | 0.116           | 12.565                            | 0.057     | 0.605            |
| miR-548t-5p      | -0.407          | 1.936                             | 0.057     | 0.605            |
| miR-29a-3p       | -0.401          | 9.472                             | 0.059     | 0.605            |
| let-7c-5p        | 0.178           | 9.528                             | 0.060     | 0.605            |
| miR-548ay-5p     | -0.214          | 13.403                            | 0.060     | 0.605            |
| miR-215-5p       | 0.276           | 2.194                             | 0.060     | 0.605            |
| miR-874-3p       | -0.160          | 1.960                             | 0.061     | 0.605            |
| miR-548d-5p      | -0.210          | 12.885                            | 0.061     | 0.605            |
| miR-29c-3p       | -0.338          | 8.568                             | 0.061     | 0.605            |
| miR-136-5p       | -0.395          | 2.770                             | 0.061     | 0.605            |
| miR-19b-3p       | -0.323          | 10.256                            | 0.063     | 0.605            |
| miR-487a-3p      | -0.442          | 0.530                             | 0.063     | 0.605            |
| miR-548ag        | -0.300          | 6.333                             | 0.063     | 0.605            |
| miR-548p         | -0.785          | 1.823                             | 0.064     | 0.605            |
| miR-326          | -0.197          | 6.590                             | 0.064     | 0.605            |
| miR-369-3p       | -0.445          | 4.919                             | 0.065     | 0.605            |
| miR-551b-3p      | -0.258          | 1.815                             | 0.065     | 0.605            |
| miR-30d-3p       | -0.213          | 1.671                             | 0.065     | 0.605            |
| miR-135a-5p      | -0.439          | 1.965                             | 0.066     | 0.605            |
| miR-33a-5p       | -0.261          | 1.653                             | 0.068     | 0.605            |
| miR-181d-5p      | 0.171           | 3.947                             | 0.068     | 0.605            |
| miR-154-5p       | -0.410          | 3.881                             | 0.070     | 0.605            |
| let-7d-3p        | 0.116           | 6.419                             | 0.073     | 0.605            |
| miR-376b-3p      | -0.410          | 3.330                             | 0.074     | 0.605            |
| miR-548u         | -0.576          | 1.210                             | 0.074     | 0.605            |
| miR-142-5p       | -0.235          | 10.854                            | 0.074     | 0.605            |
| miR-6873-3p      | 0.297           | 5.014                             | 0.075     | 0.605            |
| miR-18a-5p       | -0.137          | 7.212                             | 0.076     | 0.605            |
| miR-133b         | -0.493          | -0.138                            | 0.079     | 0.605            |
| miR-1260b        | 0.191           | 3.783                             | 0.080     | 0.605            |
| let-7i-3p        | -0.231          | 2.370                             | 0.081     | 0.605            |
| miR-548j-3p      | -0.355          | 0.393                             | 0.081     | 0.605            |
| miR-138-5p       | -0.316          | 0.000                             | 0.082     | 0.605            |

|              |        |        |       |       |
|--------------|--------|--------|-------|-------|
| miR-148b-5p  | -0.113 | 2.775  | 0.083 | 0.605 |
| miR-31-5p    | -0.473 | 2.641  | 0.085 | 0.605 |
| miR-424-3p   | 0.218  | 0.968  | 0.086 | 0.605 |
| miR-6511a-3p | 0.198  | 4.865  | 0.086 | 0.605 |
| miR-3194-3p  | -0.580 | 0.002  | 0.088 | 0.605 |
| miR-339-5p   | -0.139 | 11.621 | 0.092 | 0.605 |
| miR-106b-5p  | -0.271 | 4.658  | 0.092 | 0.605 |
| miR-181b-3p  | -0.397 | 0.083  | 0.093 | 0.605 |
| miR-125a-3p  | 0.248  | 0.692  | 0.095 | 0.605 |
| miR-1306-3p  | 0.210  | 2.215  | 0.096 | 0.605 |
| miR-598-3p   | -0.256 | 4.565  | 0.097 | 0.605 |
| miR-130b-5p  | 0.167  | 5.414  | 0.097 | 0.605 |
| miR-574-3p   | 0.151  | 5.403  | 0.098 | 0.605 |
| miR-548ah-3p | -0.782 | 2.757  | 0.098 | 0.605 |
| miR-1249     | 0.346  | 0.351  | 0.099 | 0.605 |
| miR-873-5p   | -0.418 | 1.352  | 0.099 | 0.605 |
| miR-496      | -0.337 | 1.970  | 0.100 | 0.605 |
| miR-590-5p   | -0.316 | 0.651  | 0.100 | 0.605 |
| miR-106b-3p  | 0.155  | 6.995  | 0.101 | 0.605 |
| miR-18b-5p   | -0.205 | 2.410  | 0.101 | 0.605 |
| miR-7110-3p  | 0.366  | -0.067 | 0.102 | 0.605 |
| let-7e-5p    | 0.212  | 9.484  | 0.102 | 0.605 |
| miR-223-5p   | 0.119  | 7.682  | 0.103 | 0.605 |
| miR-337-5p   | -0.311 | 3.963  | 0.104 | 0.605 |
| miR-889-3p   | -0.322 | 3.340  | 0.104 | 0.605 |
| miR-1268a    | -1.055 | 3.542  | 0.104 | 0.605 |
| miR-377-3p   | -0.306 | 2.438  | 0.105 | 0.606 |
| miR-22-3p    | -0.084 | 8.495  | 0.106 | 0.607 |
| miR-205-5p   | 0.390  | 2.270  | 0.111 | 0.629 |
| miR-324-5p   | -0.103 | 5.454  | 0.115 | 0.638 |
| miR-3688-3p  | -0.209 | 1.689  | 0.116 | 0.638 |
| miR-548j-5p  | 0.139  | 9.735  | 0.118 | 0.638 |
| miR-6513-3p  | 0.097  | 1.835  | 0.119 | 0.638 |
| miR-5583-3p  | 0.225  | 0.528  | 0.119 | 0.638 |
| miR-660-5p   | -0.149 | 5.628  | 0.121 | 0.638 |
| miR-219a-5p  | -0.278 | 1.164  | 0.123 | 0.638 |
| miR-222-3p   | 0.115  | 8.603  | 0.123 | 0.638 |
| miR-2277-5p  | 0.130  | 0.413  | 0.127 | 0.638 |
| miR-340-5p   | -0.197 | 6.743  | 0.128 | 0.638 |
| miR-616-3p   | 0.219  | 0.543  | 0.129 | 0.638 |
| miR-339-3p   | -0.109 | 5.037  | 0.129 | 0.638 |
| miR-95-3p    | -0.247 | 2.108  | 0.130 | 0.638 |
| miR-1304-3p  | 0.717  | 3.254  | 0.133 | 0.638 |
| miR-136-3p   | -0.399 | 3.534  | 0.133 | 0.638 |
| miR-144-3p   | -0.283 | 5.293  | 0.135 | 0.638 |
| miR-548al    | -0.842 | -0.392 | 0.140 | 0.638 |
| miR-4286     | -0.132 | 10.665 | 0.141 | 0.638 |
| miR-21-5p    | -0.171 | 12.294 | 0.141 | 0.638 |
| miR-369-5p   | -0.229 | 5.217  | 0.142 | 0.638 |
| miR-378i     | 0.126  | 4.394  | 0.145 | 0.638 |
| miR-651-5p   | -0.210 | 1.314  | 0.145 | 0.638 |
| miR-1285-5p  | -0.472 | 8.438  | 0.147 | 0.638 |
| miR-338-3p   | -0.175 | 5.028  | 0.150 | 0.638 |
| miR-548q     | 0.214  | 4.336  | 0.150 | 0.638 |
| miR-3198     | 0.313  | 0.544  | 0.151 | 0.638 |
| miR-130a-3p  | -0.142 | 7.658  | 0.154 | 0.638 |
| miR-624-5p   | -0.271 | 0.116  | 0.156 | 0.638 |
| miR-7641     | 0.282  | 5.298  | 0.157 | 0.638 |
| miR-30b-5p   | -0.312 | 7.651  | 0.159 | 0.638 |
| miR-664a-3p  | 0.115  | 4.261  | 0.160 | 0.638 |
| miR-362-5p   | 0.134  | 2.457  | 0.161 | 0.638 |
| miR-30a-5p   | -0.126 | 6.368  | 0.161 | 0.638 |
| miR-99a-5p   | 0.168  | 4.162  | 0.162 | 0.638 |
| miR-376a-5p  | -0.331 | 0.104  | 0.162 | 0.638 |
| miR-301a-5p  | -0.207 | 1.602  | 0.162 | 0.638 |
| miR-655-3p   | -0.392 | -0.112 | 0.163 | 0.638 |
| miR-582-3p   | -0.297 | 1.716  | 0.164 | 0.638 |
| miR-301b     | -0.159 | 1.088  | 0.164 | 0.638 |
| miR-320c     | 0.260  | 8.553  | 0.164 | 0.638 |
| miR-381-3p   | -0.233 | 5.537  | 0.165 | 0.638 |
| miR-548f-3p  | -0.289 | 5.197  | 0.165 | 0.638 |
| miR-320d     | 0.219  | 7.345  | 0.166 | 0.638 |
| miR-3913-5p  | -0.139 | 2.448  | 0.169 | 0.638 |
| miR-15a-5p   | -0.146 | 9.211  | 0.169 | 0.638 |
| miR-193a-5p  | 0.390  | 3.243  | 0.169 | 0.638 |
| miR-497-5p   | -0.174 | 1.523  | 0.171 | 0.638 |
| miR-548ap-5p | 0.118  | 9.773  | 0.172 | 0.638 |
| miR-221-3p   | 0.096  | 11.513 | 0.174 | 0.638 |
| miR-9-3p     | -0.171 | 3.953  | 0.175 | 0.638 |
| miR-664b-5p  | 0.211  | 1.474  | 0.176 | 0.638 |
| miR-122-5p   | 0.452  | 11.047 | 0.177 | 0.638 |
| miR-556-3p   | -0.202 | 1.254  | 0.178 | 0.638 |
| miR-93-3p    | 0.112  | 4.195  | 0.178 | 0.638 |
| miR-299-3p   | -0.322 | 0.096  | 0.178 | 0.638 |
| miR-3138     | 0.224  | 2.724  | 0.179 | 0.638 |
| miR-487a-5p  | -0.238 | 0.384  | 0.181 | 0.638 |
| let-7b-5p    | 0.170  | 12.514 | 0.182 | 0.638 |
| miR-374b-3p  | -0.174 | 1.235  | 0.183 | 0.638 |
| miR-320b     | 0.252  | 8.897  | 0.184 | 0.638 |
| miR-3605-3p  | 0.210  | 1.394  | 0.184 | 0.638 |
| miR-3928-3p  | 0.166  | 0.931  | 0.186 | 0.638 |
| miR-23c      | 0.113  | 0.292  | 0.187 | 0.638 |
| miR-133a-3p  | -0.278 | 7.345  | 0.187 | 0.638 |
| miR-6852-5p  | 0.222  | 2.746  | 0.188 | 0.638 |
| miR-18a-3p   | 0.146  | 2.363  | 0.189 | 0.638 |
| miR-9-5p     | -0.168 | 5.867  | 0.190 | 0.638 |
| miR-548e-5p  | -0.258 | 1.838  | 0.190 | 0.638 |

|               |        |        |       |       |
|---------------|--------|--------|-------|-------|
| miR-27b-5p    | 0.133  | 1.148  | 0.191 | 0.638 |
| miR-25-5p     | 0.181  | 2.573  | 0.192 | 0.638 |
| miR-664b-3p   | 0.132  | 2.162  | 0.192 | 0.638 |
| miR-199b-5p   | -0.278 | 4.252  | 0.193 | 0.638 |
| miR-154-3p    | -0.327 | 0.419  | 0.193 | 0.638 |
| miR-125a-5p   | 0.199  | 9.141  | 0.193 | 0.638 |
| let-7f-1-3p   | -0.225 | 0.491  | 0.194 | 0.638 |
| miR-376c-5p   | -0.379 | 1.518  | 0.196 | 0.640 |
| miR-378g      | 0.251  | 0.027  | 0.198 | 0.640 |
| let-7a-5p     | 0.131  | 17.835 | 0.198 | 0.640 |
| miR-145-5p    | 0.172  | 6.318  | 0.199 | 0.640 |
| miR-1273d     | -1.451 | 4.498  | 0.201 | 0.643 |
| miR-29b-1-5p  | 0.154  | 0.138  | 0.204 | 0.647 |
| miR-146b-5p   | -0.142 | 9.310  | 0.205 | 0.647 |
| miR-103a-2-5p | -0.266 | -0.340 | 0.209 | 0.647 |
| miR-376b-5p   | -0.370 | 1.487  | 0.210 | 0.647 |
| miR-140-5p    | -0.106 | 6.331  | 0.210 | 0.647 |
| miR-411-5p    | -0.225 | 5.491  | 0.211 | 0.647 |
| miR-3620-5p   | 0.702  | 3.024  | 0.212 | 0.647 |
| let-7f-2-3p   | -0.256 | 0.250  | 0.213 | 0.647 |
| miR-10b-5p    | 0.226  | 4.540  | 0.214 | 0.647 |
| miR-941       | 0.156  | 9.475  | 0.214 | 0.647 |
| miR-374a-3p   | -0.192 | 2.987  | 0.217 | 0.647 |
| miR-323b-3p   | -0.201 | 4.932  | 0.219 | 0.647 |
| miR-542-3p    | -0.221 | 2.341  | 0.219 | 0.647 |
| miR-3161      | 0.757  | -0.951 | 0.221 | 0.647 |
| miR-664a-5p   | 0.142  | 5.295  | 0.222 | 0.647 |
| miR-885-5p    | 0.370  | 0.498  | 0.227 | 0.647 |
| miR-92a-3p    | 0.174  | 13.677 | 0.227 | 0.647 |
| miR-6859-5p   | 0.193  | 3.735  | 0.228 | 0.647 |
| miR-1270      | 0.226  | 3.003  | 0.228 | 0.647 |
| miR-378a-3p   | 0.098  | 9.082  | 0.229 | 0.647 |
| miR-539-3p    | -0.309 | 1.473  | 0.229 | 0.647 |
| miR-376c-3p   | -0.268 | 5.292  | 0.229 | 0.647 |
| miR-1268b     | -0.555 | 0.512  | 0.230 | 0.647 |
| miR-766-5p    | 0.111  | 2.287  | 0.230 | 0.647 |
| miR-3613-5p   | 0.223  | 9.506  | 0.230 | 0.647 |
| miR-92b-5p    | 0.321  | -0.009 | 0.232 | 0.647 |
| miR-132-3p    | 0.091  | 3.504  | 0.233 | 0.647 |
| miR-505-5p    | 0.165  | 3.558  | 0.234 | 0.647 |
| miR-760       | 0.262  | 1.310  | 0.234 | 0.647 |
| miR-4507      | 1.115  | 1.601  | 0.235 | 0.647 |
| miR-3173-5p   | 0.234  | 1.011  | 0.245 | 0.665 |
| miR-548aa     | -0.271 | 10.786 | 0.245 | 0.665 |
| miR-548t-3p   | -0.271 | 10.786 | 0.245 | 0.665 |
| miR-4772-3p   | -0.289 | 1.699  | 0.247 | 0.665 |
| miR-382-5p    | -0.212 | 8.383  | 0.247 | 0.665 |
| miR-5095      | -1.849 | 8.523  | 0.251 | 0.670 |
| miR-545-3p    | -0.166 | 1.909  | 0.251 | 0.670 |
| miR-361-3p    | -0.075 | 6.970  | 0.253 | 0.672 |
| miR-576-5p    | 0.107  | 6.414  | 0.255 | 0.675 |
| miR-186-3p    | -0.112 | 0.571  | 0.257 | 0.676 |
| miR-155-5p    | 0.079  | 8.603  | 0.262 | 0.677 |
| miR-590-3p    | -0.212 | 6.770  | 0.262 | 0.677 |
| miR-382-3p    | -0.210 | 3.232  | 0.262 | 0.677 |
| miR-744-5p    | 0.149  | 7.986  | 0.263 | 0.677 |
| miR-5187-5p   | 0.170  | 2.108  | 0.263 | 0.677 |
| miR-376a-3p   | -0.239 | 6.560  | 0.265 | 0.677 |
| miR-20a-5p    | -0.097 | 9.087  | 0.266 | 0.677 |
| miR-32-3p     | -0.151 | 0.143  | 0.273 | 0.690 |
| miR-545-5p    | -0.199 | 1.482  | 0.274 | 0.690 |
| miR-495-5p    | -0.198 | -0.270 | 0.279 | 0.690 |
| miR-92b-3p    | 0.184  | 3.086  | 0.280 | 0.690 |
| miR-409-5p    | -0.166 | 3.705  | 0.280 | 0.690 |
| miR-27a-5p    | 0.170  | 2.220  | 0.280 | 0.690 |
| miR-671-3p    | 0.158  | 3.284  | 0.282 | 0.690 |
| miR-2355-5p   | -0.175 | 0.457  | 0.283 | 0.690 |
| miR-619-5p    | 0.846  | 11.202 | 0.284 | 0.690 |
| miR-641       | -0.081 | 1.385  | 0.284 | 0.690 |
| miR-98-3p     | -0.192 | 0.779  | 0.285 | 0.690 |
| miR-23a-5p    | 0.186  | 1.003  | 0.286 | 0.690 |
| miR-221-5p    | 0.070  | 5.310  | 0.288 | 0.690 |
| miR-589-5p    | 0.082  | 3.684  | 0.288 | 0.690 |
| miR-6842-3p   | 0.103  | 1.371  | 0.288 | 0.690 |
| miR-628-5p    | -0.092 | 4.677  | 0.296 | 0.707 |
| let-7d-5p     | 0.090  | 10.427 | 0.299 | 0.708 |
| miR-30e-3p    | -0.111 | 7.059  | 0.299 | 0.708 |
| miR-454-5p    | 0.059  | 3.780  | 0.302 | 0.711 |
| miR-548e-3p   | -0.132 | 2.682  | 0.303 | 0.711 |
| miR-99b-3p    | 0.151  | 2.773  | 0.308 | 0.719 |
| miR-29a-5p    | -0.115 | 0.831  | 0.312 | 0.719 |
| miR-627-5p    | -0.075 | 0.873  | 0.313 | 0.719 |
| miR-544a      | -0.367 | 0.669  | 0.315 | 0.719 |
| miR-186-5p    | -0.086 | 8.853  | 0.317 | 0.719 |
| miR-365a-3p   | 0.189  | 4.151  | 0.318 | 0.719 |
| miR-365b-3p   | 0.189  | 4.151  | 0.318 | 0.719 |
| miR-548a-3p   | -0.142 | 5.676  | 0.318 | 0.719 |
| miR-618       | 0.314  | -0.303 | 0.320 | 0.719 |
| miR-1185-2-3p | -0.203 | 0.123  | 0.320 | 0.719 |
| miR-548h-3p   | -0.274 | 8.937  | 0.321 | 0.719 |
| miR-548z      | -0.274 | 8.937  | 0.321 | 0.719 |
| let-7g-5p     | -0.053 | 10.980 | 0.326 | 0.725 |
| miR-6734-5p   | 0.166  | 0.555  | 0.326 | 0.725 |
| miR-23a-3p    | 0.061  | 11.962 | 0.328 | 0.726 |
| miR-103a-3p   | 0.051  | 15.095 | 0.330 | 0.726 |
| miR-550a-3-5p | 0.116  | 2.398  | 0.332 | 0.726 |
| miR-548ak     | -0.536 | 2.923  | 0.334 | 0.726 |



|               |        |        |       |       |
|---------------|--------|--------|-------|-------|
| miR-758-3p    | -0.186 | 1.734  | 0.335 | 0.726 |
| miR-181a-5p   | 0.102  | 10.817 | 0.335 | 0.726 |
| miR-4477b     | -0.222 | 0.399  | 0.335 | 0.726 |
| miR-5193      | 0.104  | 1.173  | 0.338 | 0.730 |
| miR-134-5p    | -0.187 | 7.091  | 0.340 | 0.732 |
| miR-374a-5p   | -0.135 | 7.594  | 0.342 | 0.732 |
| miR-1277-3p   | -0.146 | 1.948  | 0.345 | 0.734 |
| miR-501-3p    | 0.147  | 2.746  | 0.345 | 0.734 |
| miR-548an     | -0.264 | 1.688  | 0.347 | 0.734 |
| miR-28-3p     | 0.059  | 10.686 | 0.352 | 0.737 |
| miR-1301-3p   | 0.130  | 5.720  | 0.353 | 0.737 |
| miR-548d-3p   | -0.277 | 1.169  | 0.354 | 0.737 |
| miR-2115-3p   | 0.243  | 0.295  | 0.355 | 0.737 |
| miR-1         | -0.241 | 8.318  | 0.356 | 0.737 |
| miR-423-3p    | 0.124  | 8.841  | 0.356 | 0.737 |
| miR-450b-5p   | -0.153 | 2.048  | 0.357 | 0.737 |
| miR-1306-5p   | 0.240  | 2.765  | 0.361 | 0.743 |
| miR-629-5p    | 0.097  | 6.404  | 0.363 | 0.743 |
| miR-379-5p    | -0.153 | 7.187  | 0.364 | 0.743 |
| miR-7706      | 0.159  | -0.037 | 0.366 | 0.743 |
| miR-20a-3p    | -0.083 | 1.922  | 0.366 | 0.743 |
| miR-320a      | 0.145  | 11.779 | 0.371 | 0.743 |
| miR-126-5p    | -0.103 | 11.057 | 0.372 | 0.743 |
| miR-148b-3p   | -0.077 | 9.436  | 0.374 | 0.743 |
| miR-548k      | -0.082 | 1.443  | 0.377 | 0.743 |
| miR-493-3p    | -0.149 | 5.508  | 0.378 | 0.743 |
| miR-548av-5p  | -0.082 | 1.444  | 0.378 | 0.743 |
| miR-4677-3p   | -0.107 | 0.746  | 0.380 | 0.743 |
| miR-99b-5p    | 0.118  | 7.865  | 0.380 | 0.743 |
| miR-3615      | 0.175  | 5.538  | 0.381 | 0.743 |
| miR-27b-3p    | -0.088 | 10.051 | 0.381 | 0.743 |
| miR-424-5p    | -0.141 | 3.748  | 0.382 | 0.743 |
| miR-199a-3p   | -0.086 | 15.594 | 0.383 | 0.743 |
| miR-199b-3p   | -0.086 | 15.594 | 0.383 | 0.743 |
| let-7a-3p     | -0.155 | 4.497  | 0.384 | 0.743 |
| miR-335-3p    | 0.107  | 5.333  | 0.385 | 0.743 |
| miR-548a-5p   | -0.212 | 1.849  | 0.390 | 0.746 |
| miR-628-3p    | 0.072  | 5.661  | 0.391 | 0.746 |
| miR-141-3p    | -0.104 | 3.127  | 0.392 | 0.746 |
| miR-429       | -0.092 | 0.270  | 0.393 | 0.746 |
| miR-30a-3p    | -0.061 | 3.079  | 0.394 | 0.746 |
| miR-192-5p    | -0.088 | 7.507  | 0.394 | 0.746 |
| miR-3143      | -0.097 | -0.186 | 0.395 | 0.746 |
| miR-1273c     | 0.106  | 1.024  | 0.397 | 0.746 |
| miR-296-5p    | -0.139 | 1.358  | 0.398 | 0.746 |
| miR-1277-5p   | -0.124 | 12.138 | 0.402 | 0.749 |
| miR-16-2-3p   | -0.115 | 3.631  | 0.402 | 0.749 |
| miR-1303      | 0.278  | 4.458  | 0.403 | 0.749 |
| miR-4446-3p   | 0.120  | 3.069  | 0.408 | 0.756 |
| miR-127-5p    | -0.147 | 1.654  | 0.411 | 0.758 |
| miR-210-3p    | -0.070 | 2.393  | 0.414 | 0.758 |
| miR-574-5p    | 0.407  | 14.568 | 0.415 | 0.758 |
| miR-450a-5p   | -0.176 | 0.853  | 0.415 | 0.758 |
| miR-3200-3p   | -0.171 | 0.193  | 0.417 | 0.758 |
| miR-548f-5p   | -0.382 | 0.762  | 0.419 | 0.758 |
| miR-1307-3p   | 0.142  | 7.329  | 0.420 | 0.758 |
| miR-548az-5p  | -0.231 | 5.839  | 0.423 | 0.758 |
| miR-3120-3p   | -0.073 | 2.583  | 0.424 | 0.758 |
| miR-500a-3p   | 0.065  | 4.766  | 0.425 | 0.758 |
| miR-1294      | 0.127  | 1.946  | 0.426 | 0.758 |
| miR-1226-3p   | 0.119  | 1.073  | 0.426 | 0.758 |
| miR-1185-1-3p | -0.150 | 3.358  | 0.427 | 0.758 |
| miR-6513-5p   | 0.074  | 0.012  | 0.428 | 0.758 |
| miR-487b-3p   | -0.132 | 5.402  | 0.428 | 0.758 |
| miR-340-3p    | -0.055 | 3.655  | 0.434 | 0.763 |
| miR-7849-3p   | 0.090  | 0.247  | 0.434 | 0.763 |
| miR-191-3p    | 0.057  | 3.805  | 0.439 | 0.763 |
| miR-4659a-3p  | 0.100  | 0.124  | 0.442 | 0.763 |
| miR-5585-3p   | -0.861 | 6.719  | 0.443 | 0.763 |
| miR-548ar-5p  | -0.300 | 7.739  | 0.444 | 0.763 |
| miR-106a-5p   | -0.098 | 1.761  | 0.445 | 0.763 |
| miR-548l      | 0.089  | 1.877  | 0.446 | 0.763 |
| miR-3617-5p   | 0.124  | 0.442  | 0.448 | 0.763 |
| miR-206       | 0.336  | 1.104  | 0.449 | 0.763 |
| miR-26b-5p    | -0.061 | 12.787 | 0.452 | 0.763 |
| miR-4433b-3p  | -0.174 | 2.351  | 0.452 | 0.763 |
| miR-744-3p    | -0.155 | -0.457 | 0.455 | 0.763 |
| miR-548ab     | -0.320 | 4.211  | 0.455 | 0.763 |
| miR-652-5p    | -0.103 | 1.446  | 0.455 | 0.763 |
| let-7b-3p     | 0.078  | 1.579  | 0.456 | 0.763 |
| miR-548x-3p   | -0.740 | 2.828  | 0.457 | 0.763 |
| miR-539-5p    | -0.189 | 0.162  | 0.458 | 0.763 |
| miR-185-5p    | -0.041 | 9.811  | 0.459 | 0.763 |
| miR-183-5p    | 0.142  | 5.546  | 0.461 | 0.763 |
| miR-548g-3p   | -0.546 | 1.192  | 0.462 | 0.763 |
| miR-409-3p    | -0.123 | 8.698  | 0.462 | 0.763 |
| miR-335-5p    | -0.090 | 7.461  | 0.462 | 0.763 |
| miR-1229-3p   | 0.115  | 0.765  | 0.466 | 0.763 |
| miR-1255b-5p  | 0.121  | 7.593  | 0.466 | 0.763 |
| miR-30b-3p    | 0.068  | 0.223  | 0.469 | 0.763 |
| miR-1908-5p   | 0.183  | 2.300  | 0.470 | 0.763 |
| miR-502-3p    | 0.065  | 3.800  | 0.470 | 0.763 |
| miR-548aj-5p  | -0.267 | 7.504  | 0.472 | 0.763 |
| miR-548g-5p   | -0.267 | 7.504  | 0.472 | 0.763 |
| miR-548x-5p   | -0.267 | 7.504  | 0.472 | 0.763 |
| miR-1185-5p   | -0.156 | 2.420  | 0.477 | 0.768 |
| miR-6772-3p   | 0.116  | 0.690  | 0.478 | 0.768 |

|              |        |        |       |       |
|--------------|--------|--------|-------|-------|
| miR-6500-3p  | -0.300 | -0.223 | 0.479 | 0.768 |
| miR-15b-3p   | -0.092 | 5.648  | 0.480 | 0.768 |
| miR-328-3p   | 0.114  | 5.945  | 0.481 | 0.768 |
| miR-1972     | -0.999 | 5.510  | 0.486 | 0.770 |
| miR-425-5p   | 0.050  | 10.913 | 0.486 | 0.770 |
| miR-148a-5p  | 0.075  | 0.933  | 0.486 | 0.770 |
| miR-331-3p   | -0.064 | 4.398  | 0.490 | 0.771 |
| miR-16-5p    | -0.049 | 17.408 | 0.491 | 0.771 |
| miR-181a-3p  | -0.090 | 4.944  | 0.491 | 0.771 |
| miR-654-3p   | -0.114 | 7.125  | 0.495 | 0.775 |
| miR-548n     | -0.071 | 4.212  | 0.498 | 0.777 |
| miR-548ap-3p | -0.159 | 10.374 | 0.501 | 0.777 |
| miR-378a-5p  | 0.083  | 2.841  | 0.501 | 0.777 |
| miR-379-3p   | -0.124 | 1.468  | 0.503 | 0.777 |
| miR-548av-3p | -0.207 | 3.903  | 0.504 | 0.777 |
| miR-550a-5p  | 0.087  | 1.899  | 0.506 | 0.777 |
| miR-378c     | -0.064 | 5.108  | 0.508 | 0.777 |
| miR-6803-3p  | 0.151  | -0.112 | 0.509 | 0.777 |
| miR-665      | -0.139 | 0.677  | 0.510 | 0.777 |
| miR-196a-5p  | -0.149 | 2.899  | 0.511 | 0.777 |
| let-7i-5p    | 0.041  | 13.259 | 0.511 | 0.777 |
| miR-483-5p   | 0.252  | 1.834  | 0.512 | 0.777 |
| miR-4659b-3p | -0.063 | 0.948  | 0.521 | 0.787 |
| miR-378d     | -0.241 | 0.023  | 0.524 | 0.787 |
| miR-584-3p   | -0.084 | 0.426  | 0.524 | 0.787 |
| miR-145-3p   | 0.089  | 1.763  | 0.525 | 0.787 |
| miR-182-5p   | 0.085  | 7.556  | 0.525 | 0.787 |
| miR-671-5p   | 0.084  | 4.210  | 0.526 | 0.787 |
| miR-548ax    | -0.065 | 5.062  | 0.530 | 0.791 |
| miR-1233-3p  | -0.379 | -0.544 | 0.533 | 0.792 |
| miR-130b-3p  | -0.041 | 5.063  | 0.534 | 0.792 |
| miR-431-3p   | -0.111 | 0.193  | 0.535 | 0.792 |
| miR-25-3p    | 0.046  | 10.901 | 0.536 | 0.792 |
| miR-548ae    | -0.626 | 3.953  | 0.538 | 0.792 |
| miR-6511b-3p | 0.076  | 2.078  | 0.539 | 0.792 |
| miR-584-5p   | 0.065  | 9.252  | 0.541 | 0.793 |
| miR-20b-5p   | -0.057 | 5.620  | 0.547 | 0.799 |
| miR-548as-5p | -0.162 | 3.448  | 0.551 | 0.801 |
| miR-224-5p   | 0.123  | 7.850  | 0.551 | 0.801 |
| miR-1290     | 0.167  | 4.532  | 0.554 | 0.804 |
| miR-642a-3p  | 0.118  | 0.484  | 0.556 | 0.804 |
| miR-1179     | 0.056  | 1.832  | 0.558 | 0.804 |
| miR-30d-5p   | 0.029  | 11.785 | 0.559 | 0.804 |
| miR-28-5p    | -0.035 | 6.656  | 0.560 | 0.804 |
| miR-324-3p   | -0.039 | 4.372  | 0.561 | 0.804 |
| miR-139-3p   | 0.118  | 4.524  | 0.563 | 0.806 |
| miR-150-3p   | 0.107  | 1.296  | 0.567 | 0.807 |
| miR-181c-3p  | -0.055 | 3.538  | 0.567 | 0.807 |
| miR-423-5p   | 0.126  | 10.597 | 0.572 | 0.811 |
| miR-452-5p   | -0.106 | 2.671  | 0.574 | 0.811 |
| miR-22-5p    | -0.057 | 3.999  | 0.574 | 0.811 |
| miR-4433b-5p | 0.100  | 7.929  | 0.575 | 0.811 |
| miR-485-3p   | -0.133 | 5.831  | 0.585 | 0.821 |
| miR-2110     | 0.100  | 3.338  | 0.589 | 0.821 |
| miR-425-3p   | -0.033 | 6.606  | 0.591 | 0.821 |
| miR-126-3p   | -0.032 | 14.192 | 0.591 | 0.821 |
| miR-190a-5p  | -0.068 | 5.571  | 0.592 | 0.821 |
| miR-6741-3p  | 0.106  | 0.231  | 0.592 | 0.821 |
| miR-431-5p   | -0.086 | 7.576  | 0.593 | 0.821 |
| miR-769-3p   | 0.075  | 0.674  | 0.594 | 0.821 |
| miR-30c-1-3p | 0.036  | 2.582  | 0.597 | 0.824 |
| miR-548w     | -0.140 | 5.896  | 0.601 | 0.827 |
| miR-3158-3p  | -0.118 | 1.499  | 0.609 | 0.836 |
| miR-542-5p   | 0.072  | 1.306  | 0.612 | 0.836 |
| miR-503-5p   | 0.056  | 3.907  | 0.614 | 0.836 |
| miR-2355-3p  | -0.038 | 3.959  | 0.615 | 0.836 |
| miR-195-5p   | -0.053 | 3.376  | 0.616 | 0.836 |
| miR-495-3p   | -0.093 | 3.399  | 0.616 | 0.836 |
| miR-337-3p   | -0.111 | 2.407  | 0.620 | 0.839 |
| miR-29b-2-5p | 0.031  | 1.605  | 0.621 | 0.839 |
| miR-329-3p   | -0.076 | 5.645  | 0.625 | 0.843 |
| miR-17-5p    | -0.053 | 8.427  | 0.629 | 0.844 |
| miR-363-3p   | -0.055 | 6.300  | 0.631 | 0.844 |
| miR-4448     | 0.078  | 4.223  | 0.632 | 0.844 |
| miR-5189-3p  | 0.140  | 0.435  | 0.632 | 0.844 |
| miR-451a     | -0.077 | 11.183 | 0.635 | 0.846 |
| miR-342-5p   | 0.053  | 3.944  | 0.640 | 0.848 |
| miR-139-5p   | -0.070 | 6.068  | 0.640 | 0.848 |
| miR-548at-5p | -0.088 | 4.401  | 0.641 | 0.848 |
| miR-374b-5p  | -0.064 | 6.920  | 0.647 | 0.854 |
| miR-4301     | -0.207 | 2.532  | 0.650 | 0.856 |
| miR-30c-5p   | -0.049 | 11.296 | 0.652 | 0.857 |
| miR-4732-3p  | 0.134  | 3.928  | 0.654 | 0.858 |
| miR-493-5p   | -0.075 | 5.498  | 0.657 | 0.858 |
| miR-548o-3p  | 0.153  | 2.775  | 0.658 | 0.858 |
| miR-1273g-3p | -0.575 | 11.153 | 0.661 | 0.858 |
| miR-190b     | 0.026  | 3.267  | 0.661 | 0.858 |
| miR-421      | 0.021  | 5.199  | 0.663 | 0.858 |
| miR-96-5p    | -0.093 | 3.856  | 0.663 | 0.858 |
| miR-194-5p   | -0.055 | 7.337  | 0.666 | 0.860 |
| miR-485-5p   | -0.101 | 3.492  | 0.674 | 0.860 |
| miR-1302     | -0.295 | 2.800  | 0.674 | 0.860 |
| miR-98-5p    | 0.029  | 8.594  | 0.675 | 0.860 |
| miR-5009-5p  | -0.076 | 0.291  | 0.676 | 0.860 |
| miR-532-5p   | -0.038 | 5.499  | 0.676 | 0.860 |
| miR-26b-3p   | -0.026 | 3.623  | 0.677 | 0.860 |
| miR-3064-5p  | 0.036  | 0.924  | 0.678 | 0.860 |

|               |        |        |       |       |
|---------------|--------|--------|-------|-------|
| miR-5010-5p   | 0.102  | 0.210  | 0.678 | 0.860 |
| miR-203a      | 0.087  | -0.173 | 0.682 | 0.860 |
| miR-6511b-5p  | 0.183  | 1.158  | 0.683 | 0.860 |
| miR-1304-5p   | -0.282 | 0.167  | 0.683 | 0.860 |
| miR-766-3p    | -0.039 | 5.380  | 0.684 | 0.860 |
| miR-494-3p    | -0.073 | 5.857  | 0.686 | 0.861 |
| miR-3180      | -0.174 | 0.868  | 0.692 | 0.865 |
| miR-3180-3p   | -0.174 | 0.868  | 0.692 | 0.865 |
| miR-4732-5p   | 0.115  | 3.999  | 0.701 | 0.875 |
| miR-3187-3p   | 0.060  | 0.369  | 0.705 | 0.875 |
| miR-4435      | 0.064  | 1.570  | 0.705 | 0.875 |
| miR-1273h-5p  | 0.056  | 11.451 | 0.709 | 0.875 |
| miR-483-3p    | 0.132  | 1.205  | 0.709 | 0.875 |
| miR-1285-3p   | -0.041 | 8.508  | 0.710 | 0.875 |
| miR-144-5p    | -0.078 | 7.018  | 0.710 | 0.875 |
| miR-1255a     | 0.075  | 4.833  | 0.714 | 0.878 |
| miR-4785      | -0.038 | 0.526  | 0.716 | 0.878 |
| miR-589-3p    | 0.028  | 1.137  | 0.718 | 0.878 |
| miR-181b-5p   | 0.035  | 8.044  | 0.719 | 0.878 |
| miR-196b-5p   | 0.023  | 5.658  | 0.720 | 0.878 |
| miR-299-5p    | -0.058 | 2.468  | 0.724 | 0.882 |
| miR-223-3p    | 0.025  | 14.649 | 0.727 | 0.882 |
| miR-486-3p    | 0.068  | 5.430  | 0.729 | 0.884 |
| miR-204-5p    | -0.062 | 1.457  | 0.732 | 0.884 |
| miR-181a-2-3p | -0.025 | 5.645  | 0.733 | 0.884 |
| miR-93-5p     | 0.017  | 11.309 | 0.735 | 0.885 |
| miR-1273h-3p  | 0.044  | 7.277  | 0.740 | 0.889 |
| miR-1299      | -0.190 | 4.630  | 0.741 | 0.889 |
| miR-548am-3p  | -0.232 | 2.613  | 0.742 | 0.889 |
| miR-143-5p    | 0.055  | 1.979  | 0.747 | 0.893 |
| let-7f-5p     | 0.022  | 16.225 | 0.751 | 0.895 |
| miR-514a-3p   | -0.097 | 0.606  | 0.755 | 0.897 |
| miR-491-5p    | 0.027  | 3.945  | 0.756 | 0.897 |
| miR-504-5p    | 0.042  | 0.213  | 0.757 | 0.897 |
| miR-1287-5p   | 0.025  | 3.050  | 0.758 | 0.897 |
| miR-185-3p    | 0.034  | 4.607  | 0.762 | 0.898 |
| miR-1292-5p   | -0.057 | 0.211  | 0.764 | 0.898 |
| miR-1468-5p   | -0.027 | 0.552  | 0.767 | 0.898 |
| miR-1180-3p   | 0.077  | 2.024  | 0.767 | 0.898 |
| miR-152-3p    | -0.025 | 7.210  | 0.768 | 0.898 |
| miR-150-5p    | -0.056 | 10.272 | 0.769 | 0.898 |
| miR-652-3p    | -0.020 | 7.109  | 0.773 | 0.898 |
| miR-330-3p    | -0.017 | 3.864  | 0.773 | 0.898 |
| miR-432-5p    | 0.057  | 7.959  | 0.774 | 0.898 |
| miR-4645-3p   | 0.028  | 0.811  | 0.775 | 0.898 |
| miR-15b-5p    | -0.030 | 9.487  | 0.781 | 0.904 |
| miR-26a-5p    | -0.017 | 15.391 | 0.785 | 0.905 |
| miR-6770-3p   | 0.059  | 0.142  | 0.787 | 0.905 |
| miR-486-5p    | 0.061  | 14.249 | 0.787 | 0.905 |
| miR-6516-5p   | 0.030  | 1.586  | 0.788 | 0.905 |
| miR-342-3p    | 0.030  | 10.283 | 0.790 | 0.905 |
| miR-454-3p    | 0.017  | 8.563  | 0.793 | 0.906 |
| miR-1233-5p   | -0.164 | -0.221 | 0.794 | 0.906 |
| miR-146a-5p   | -0.019 | 12.934 | 0.795 | 0.906 |
| miR-484       | 0.039  | 7.854  | 0.800 | 0.909 |
| miR-877-3p    | -0.065 | 2.150  | 0.801 | 0.909 |
| miR-3179      | 0.070  | -0.272 | 0.809 | 0.915 |
| miR-487b-5p   | -0.043 | 0.849  | 0.809 | 0.915 |
| miR-370-3p    | -0.053 | 5.773  | 0.812 | 0.916 |
| miR-1246      | 0.063  | 5.861  | 0.815 | 0.916 |
| miR-3133      | 0.114  | -0.564 | 0.815 | 0.916 |
| miR-148a-3p   | -0.022 | 10.002 | 0.817 | 0.916 |
| miR-26a-2-3p  | 0.037  | -0.153 | 0.818 | 0.916 |
| miR-433-3p    | -0.043 | 1.880  | 0.824 | 0.920 |
| miR-3679-5p   | 0.030  | 2.384  | 0.827 | 0.922 |
| miR-500b-5p   | -0.036 | 2.709  | 0.829 | 0.922 |
| miR-505-3p    | 0.011  | 4.359  | 0.833 | 0.922 |
| miR-7-5p      | -0.021 | 10.227 | 0.834 | 0.922 |
| miR-24-3p     | 0.011  | 12.655 | 0.834 | 0.922 |
| miR-3960      | -0.107 | 3.467  | 0.834 | 0.922 |
| miR-127-3p    | 0.032  | 7.007  | 0.838 | 0.925 |
| miR-181c-5p   | 0.025  | 3.046  | 0.842 | 0.927 |
| miR-128-3p    | -0.012 | 10.346 | 0.846 | 0.927 |
| miR-550a-3p   | 0.032  | 3.973  | 0.849 | 0.927 |
| miR-151a-3p   | 0.017  | 11.573 | 0.849 | 0.927 |
| miR-378f      | 0.021  | 1.820  | 0.850 | 0.927 |
| miR-3065-5p   | 0.022  | 2.573  | 0.850 | 0.927 |
| miR-146b-3p   | -0.016 | 3.582  | 0.851 | 0.927 |
| miR-151b      | 0.017  | 11.596 | 0.853 | 0.927 |
| miR-200a-3p   | 0.016  | 2.514  | 0.855 | 0.927 |
| miR-151a-3p   | -0.009 | 12.424 | 0.863 | 0.927 |
| miR-548i      | -0.068 | 3.203  | 0.866 | 0.927 |
| miR-4454      | 0.028  | 9.159  | 0.866 | 0.927 |
| miR-19b-1-5p  | -0.015 | 0.495  | 0.868 | 0.927 |
| miR-4685-3p   | 0.034  | 0.669  | 0.868 | 0.927 |
| miR-769-5p    | -0.008 | 4.654  | 0.868 | 0.927 |
| miR-6511a-5p  | 0.076  | 1.038  | 0.868 | 0.927 |
| miR-548ai     | 0.104  | 0.527  | 0.870 | 0.927 |
| miR-570-5p    | 0.104  | 0.527  | 0.870 | 0.927 |
| miR-708-5p    | -0.071 | 2.615  | 0.870 | 0.927 |
| miR-329-5p    | -0.031 | 2.442  | 0.874 | 0.929 |
| miR-146a-3p   | 0.109  | 2.291  | 0.877 | 0.929 |
| miR-548aq-5p  | 0.103  | 2.543  | 0.877 | 0.929 |
| miR-4326      | 0.042  | 1.874  | 0.881 | 0.931 |
| miR-345-5p    | -0.012 | 4.607  | 0.884 | 0.931 |
| miR-4662a-5p  | -0.019 | 1.907  | 0.884 | 0.931 |
| miR-532-3p    | -0.018 | 2.783  | 0.887 | 0.931 |

| miR-143-3p          | 0.024           | 9.208                  | 0.887     | 0.931            |
|---------------------|-----------------|------------------------|-----------|------------------|
| miR-6859-3p         | -0.050          | 0.719                  | 0.890     | 0.932            |
| miR-3065-3p         | -0.018          | 0.404                  | 0.892     | 0.932            |
| miR-1271-5p         | -0.013          | 1.919                  | 0.893     | 0.932            |
| miR-5096            | -0.072          | 11.722                 | 0.901     | 0.939            |
| miR-412-5p          | -0.039          | 2.206                  | 0.910     | 0.947            |
| miR-1271-3p         | -0.063          | -0.768                 | 0.914     | 0.948            |
| miR-548b-5p         | -0.016          | 7.793                  | 0.915     | 0.948            |
| miR-132-5p          | 0.010           | 0.644                  | 0.917     | 0.948            |
| miR-543             | -0.015          | 3.379                  | 0.919     | 0.948            |
| miR-3074-5p         | 0.018           | 1.854                  | 0.920     | 0.948            |
| miR-576-3p          | 0.008           | 5.501                  | 0.922     | 0.948            |
| miR-3140-3p         | 0.011           | 0.699                  | 0.923     | 0.948            |
| miR-3180-5p         | 0.037           | -0.295                 | 0.924     | 0.948            |
| miR-323a-3p         | -0.014          | 4.078                  | 0.927     | 0.949            |
| miR-1289            | 0.028           | -0.148                 | 0.932     | 0.953            |
| miR-7976            | -0.008          | 1.801                  | 0.940     | 0.959            |
| miR-877-5p          | -0.005          | 2.378                  | 0.941     | 0.959            |
| miR-107             | -0.004          | 10.028                 | 0.947     | 0.963            |
| miR-7851-3p         | -0.013          | 3.495                  | 0.953     | 0.968            |
| miR-29c-5p          | -0.004          | 4.579                  | 0.955     | 0.968            |
| miR-7-1-3p          | -0.006          | 2.452                  | 0.959     | 0.971            |
| miR-140-3p          | -0.002          | 9.249                  | 0.971     | 0.981            |
| miR-500a-5p         | -0.005          | 3.026                  | 0.975     | 0.981            |
| miR-200b-3p         | -0.003          | 2.188                  | 0.976     | 0.981            |
| miR-26a-1-3p        | 0.002           | 2.985                  | 0.978     | 0.981            |
| miR-1296-5p         | -0.002          | 2.226                  | 0.978     | 0.981            |
| miR-551a            | -0.003          | -0.321                 | 0.988     | 0.989            |
| miR-548c-3p         | 0.000           | 2.905                  | 1.000     | 1.000            |
| miRNA               | log-fold change | log-counts per million | p-value   | adjusted p-value |
| Control vs. Patient |                 |                        |           |                  |
| miR-34a-5p          | -1.239          | 4.676                  | 1.650E-08 | 9.720E-06        |
| miR-345-5p          | -0.540          | 4.607                  | 1.131E-05 | 0.003            |
| miR-200c-3p         | 0.333           | 5.273                  | 3.109E-05 | 0.006            |
| miR-10a-3p          | 0.697           | 1.500                  | 7.141E-05 | 0.011            |
| miR-151a-5p         | 0.411           | 11.573                 | 0.001     | 0.096            |
| miR-151b            | 0.406           | 11.596                 | 0.001     | 0.096            |
| miR-551a            | -1.102          | -0.321                 | 0.001     | 0.096            |
| miR-133a-3p         | -0.949          | 7.345                  | 0.002     | 0.119            |
| miR-206             | -1.883          | 1.104                  | 0.002     | 0.119            |
| miR-133b            | -1.200          | -0.138                 | 0.002     | 0.123            |
| miR-542-5p          | -0.636          | 1.306                  | 0.003     | 0.161            |
| miR-296-5p          | -0.637          | 1.358                  | 0.006     | 0.262            |
| miR-660-5p          | -0.378          | 5.628                  | 0.006     | 0.262            |
| miR-18a-3p          | -0.440          | 2.363                  | 0.007     | 0.262            |
| miR-223-3p          | -0.276          | 14.649                 | 0.007     | 0.262            |
| miR-205-5p          | -1.031          | 2.270                  | 0.008     | 0.262            |
| miR-361-3p          | -0.251          | 6.970                  | 0.008     | 0.262            |
| let-7b-3p           | -0.407          | 1.579                  | 0.008     | 0.262            |
| miR-30a-5p          | -0.334          | 6.368                  | 0.009     | 0.262            |
| miR-93-3p           | -0.315          | 4.195                  | 0.009     | 0.262            |
| let-7f-5p           | 0.246           | 16.225                 | 0.011     | 0.296            |
| miR-532-3p          | -0.480          | 2.783                  | 0.011     | 0.296            |
| miR-144-3p          | -0.677          | 5.293                  | 0.012     | 0.296            |
| miR-425-3p          | -0.215          | 6.606                  | 0.012     | 0.300            |
| miR-550a-3p         | -0.641          | 3.973                  | 0.013     | 0.300            |
| miR-10a-5p          | 0.282           | 7.108                  | 0.013     | 0.300            |
| miR-17-5p           | 0.363           | 8.427                  | 0.014     | 0.314            |
| miR-451a            | -0.569          | 11.183                 | 0.016     | 0.326            |
| miR-7976            | -0.396          | 1.801                  | 0.016     | 0.326            |
| miR-196b-5p         | 0.212           | 5.658                  | 0.017     | 0.326            |
| miR-135a-5p         | -0.682          | 1.965                  | 0.017     | 0.326            |
| miR-106b-3p         | -0.322          | 6.995                  | 0.018     | 0.340            |
| miR-148a-5p         | -0.354          | 0.933                  | 0.021     | 0.375            |
| miR-25-3p           | -0.248          | 10.901                 | 0.022     | 0.377            |
| miR-1289            | -1.046          | -0.148                 | 0.023     | 0.385            |
| miR-324-3p          | -0.214          | 4.372                  | 0.024     | 0.387            |
| miR-5583-3p         | 0.460           | 0.528                  | 0.024     | 0.387            |
| miR-30b-3p          | 0.295           | 0.223                  | 0.026     | 0.391            |
| miR-23b-3p          | 0.194           | 9.599                  | 0.028     | 0.391            |
| miR-326             | -0.326          | 6.590                  | 0.028     | 0.391            |
| miR-3158-3p         | -0.743          | 1.499                  | 0.028     | 0.391            |
| miR-146a-5p         | 0.214           | 12.934                 | 0.029     | 0.391            |
| miR-532-5p          | -0.283          | 5.499                  | 0.029     | 0.391            |
| miR-1303            | -1.127          | 4.458                  | 0.029     | 0.391            |
| miR-378a-5p         | -0.396          | 2.841                  | 0.030     | 0.391            |
| miR-16-5p           | -0.218          | 17.408                 | 0.032     | 0.403            |
| miR-155-5p          | 0.215           | 8.603                  | 0.032     | 0.403            |
| miR-3615            | -0.647          | 5.538                  | 0.033     | 0.403            |
| miR-26b-5p          | 0.235           | 12.787                 | 0.034     | 0.403            |
| miR-140-3p          | -0.168          | 9.249                  | 0.036     | 0.418            |
| miR-331-3p          | 0.268           | 4.398                  | 0.036     | 0.418            |
| miR-484             | -0.463          | 7.854                  | 0.037     | 0.418            |
| miR-4785            | -0.304          | 0.526                  | 0.038     | 0.418            |
| miR-374a-3p         | 0.435           | 2.987                  | 0.040     | 0.432            |
| miR-224-5p          | -0.584          | 7.850                  | 0.040     | 0.432            |
| miR-502-3p          | -0.265          | 3.800                  | 0.042     | 0.440            |
| miR-26b-3p          | -0.179          | 3.623                  | 0.043     | 0.440            |
| miR-769-5p          | -0.130          | 4.654                  | 0.044     | 0.443            |
| miR-412-5p          | 1.005           | 2.206                  | 0.045     | 0.443            |
| miR-4286            | -0.248          | 10.665                 | 0.045     | 0.443            |
| miR-6513-5p         | 0.252           | 0.012                  | 0.047     | 0.443            |
| miR-339-5p          | -0.233          | 11.621                 | 0.047     | 0.443            |
| miR-30e-5p          | -0.151          | 10.655                 | 0.048     | 0.443            |
| miR-28-5p           | 0.161           | 6.656                  | 0.049     | 0.443            |

|                  |        |        |       |       |
|------------------|--------|--------|-------|-------|
| miR-183-5p       | -0.553 | 5.546  | 0.049 | 0.443 |
| miR-664a-3p      | 0.222  | 4.261  | 0.051 | 0.443 |
| miR-339-3p       | -0.196 | 5.037  | 0.051 | 0.443 |
| miR-618          | -0.905 | -0.303 | 0.051 | 0.443 |
| miR-363-3p       | -0.320 | 6.300  | 0.052 | 0.443 |
| miR-5584-5p      | 0.373  | 0.672  | 0.053 | 0.443 |
| miR-130a-3p      | 0.257  | 7.658  | 0.054 | 0.444 |
| miR-192-5p       | -0.286 | 7.507  | 0.055 | 0.444 |
| miR-6513-3p      | 0.167  | 1.835  | 0.055 | 0.444 |
| miR-203a         | -0.524 | -0.173 | 0.056 | 0.445 |
| miR-642a-3p      | -0.565 | 0.484  | 0.057 | 0.448 |
| miR-139-5p       | 0.384  | 6.068  | 0.058 | 0.452 |
| miR-148b-3p      | 0.223  | 9.436  | 0.060 | 0.455 |
| miR-340-3p       | 0.180  | 3.655  | 0.060 | 0.455 |
| miR-96-5p        | -0.563 | 3.856  | 0.062 | 0.455 |
| miR-10b-5p       | -0.515 | 4.540  | 0.062 | 0.455 |
| miR-514a-3p      | 0.836  | 0.606  | 0.065 | 0.456 |
| miR-374a-5p      | 0.353  | 7.594  | 0.066 | 0.456 |
| miR-550a-3-5p    | -0.320 | 2.398  | 0.068 | 0.456 |
| miR-196a-5p      | -0.585 | 2.899  | 0.068 | 0.456 |
| miR-1233-5p      | -1.587 | -0.221 | 0.069 | 0.456 |
| miR-26a-5p       | 0.158  | 15.391 | 0.069 | 0.456 |
| miR-1180-3p      | -0.699 | 2.024  | 0.070 | 0.456 |
| miR-627-5p       | -0.189 | 0.873  | 0.070 | 0.456 |
| miR-486-5p       | -0.615 | 14.249 | 0.071 | 0.456 |
| miR-98-5p        | 0.169  | 8.594  | 0.071 | 0.456 |
| miR-3679-5p      | -0.350 | 2.384  | 0.071 | 0.456 |
| miR-4685-3p      | -0.526 | 0.669  | 0.072 | 0.456 |
| miR-629-5p       | -0.272 | 6.404  | 0.073 | 0.456 |
| miR-365a-3p      | -0.506 | 4.151  | 0.075 | 0.456 |
| miR-365b-3p      | -0.506 | 4.151  | 0.075 | 0.456 |
| miR-370-3p       | -0.548 | 5.773  | 0.075 | 0.456 |
| miR-22-3p        | -0.129 | 8.495  | 0.075 | 0.456 |
| miR-154-3p       | 0.617  | 0.419  | 0.081 | 0.478 |
| miR-4732-3p      | -0.787 | 3.928  | 0.081 | 0.478 |
| miR-3120-3p      | 0.215  | 2.583  | 0.081 | 0.478 |
| miR-26a-1-3p     | 0.163  | 2.985  | 0.084 | 0.485 |
| miR-664b-3p      | 0.243  | 2.162  | 0.084 | 0.485 |
| miR-186-3p       | -0.234 | 0.571  | 0.086 | 0.492 |
| miR-146b-3p      | -0.205 | 3.582  | 0.087 | 0.492 |
| miR-500b-5p      | -0.405 | 2.709  | 0.089 | 0.498 |
| miR-941          | -0.319 | 9.475  | 0.090 | 0.498 |
| miR-500a-5p      | -0.362 | 3.026  | 0.093 | 0.506 |
| miR-29b-2-5p     | 0.145  | 1.605  | 0.093 | 0.506 |
| miR-590-3p       | 0.419  | 6.770  | 0.096 | 0.506 |
| miR-7706         | -0.429 | -0.037 | 0.096 | 0.506 |
| miR-150-5p       | -0.472 | 10.272 | 0.097 | 0.506 |
| miR-454-3p       | 0.150  | 8.563  | 0.097 | 0.506 |
| miR-1277-5p      | 0.339  | 12.138 | 0.098 | 0.506 |
| miR-665          | -0.484 | 0.677  | 0.098 | 0.506 |
| miR-548u         | 0.763  | 1.210  | 0.101 | 0.508 |
| miR-93-5p        | -0.115 | 11.309 | 0.101 | 0.508 |
| miR-628-5p       | 0.195  | 4.677  | 0.102 | 0.508 |
| miR-550a-5p      | -0.314 | 1.899  | 0.103 | 0.508 |
| miR-548j-5p      | 0.202  | 9.735  | 0.103 | 0.508 |
| miR-548ap-5p     | 0.197  | 9.773  | 0.103 | 0.508 |
| miR-204-5p       | 0.418  | 1.457  | 0.105 | 0.513 |
| miR-1296-5p      | -0.158 | 2.226  | 0.107 | 0.516 |
| miR-4677-3p      | 0.267  | 0.746  | 0.109 | 0.518 |
| miR-652-5p       | 0.301  | 1.446  | 0.109 | 0.518 |
| miR-199b-5p      | -0.489 | 4.252  | 0.111 | 0.523 |
| miR-103a-3p      | 0.115  | 15.095 | 0.113 | 0.524 |
| miR-425-5p       | -0.160 | 10.913 | 0.114 | 0.524 |
| miR-486-3p       | -0.452 | 5.430  | 0.115 | 0.524 |
| miR-500a-3p      | -0.183 | 4.766  | 0.117 | 0.524 |
| miR-4645-3p      | 0.212  | 0.811  | 0.117 | 0.524 |
| miR-539-5p       | 0.517  | 0.162  | 0.119 | 0.524 |
| miR-589-5p       | -0.171 | 3.684  | 0.119 | 0.524 |
| miR-769-3p       | -0.317 | 0.674  | 0.119 | 0.524 |
| miR-495-3p       | 0.390  | 3.399  | 0.119 | 0.524 |
| miR-1277-3p      | 0.327  | 1.948  | 0.121 | 0.524 |
| miR-548am-c-o-5p | 0.214  | 14.295 | 0.122 | 0.524 |
| miR-92a-3p       | -0.321 | 13.677 | 0.122 | 0.524 |
| miR-194-5p       | -0.285 | 7.337  | 0.124 | 0.530 |
| miR-21-3p        | -0.308 | 3.394  | 0.126 | 0.534 |
| miR-548au-5p     | 0.205  | 14.473 | 0.127 | 0.535 |
| miR-338-3p       | -0.257 | 5.028  | 0.128 | 0.535 |
| miR-766-5p       | 0.195  | 2.287  | 0.131 | 0.538 |
| miR-335-5p       | 0.248  | 7.461  | 0.134 | 0.538 |
| miR-152-3p       | 0.169  | 7.210  | 0.134 | 0.538 |
| miR-199a-3p      | 0.198  | 15.594 | 0.136 | 0.538 |
| miR-199b-3p      | 0.198  | 15.594 | 0.136 | 0.538 |
| miR-616-3p       | -0.313 | 0.543  | 0.136 | 0.538 |
| miR-26a-2-3p     | 0.331  | -0.153 | 0.136 | 0.538 |
| miR-874-3p       | -0.175 | 1.960  | 0.136 | 0.538 |
| miR-539-3p       | 0.506  | 1.473  | 0.137 | 0.538 |
| miR-150-3p       | -0.405 | 1.296  | 0.141 | 0.546 |
| miR-32-3p        | 0.273  | 0.143  | 0.141 | 0.546 |
| miR-181b-5p      | -0.199 | 8.044  | 0.142 | 0.548 |
| miR-424-5p       | -0.337 | 3.748  | 0.143 | 0.549 |
| miR-491-5p       | -0.180 | 3.945  | 0.147 | 0.554 |
| miR-1292-5p      | -0.399 | 0.211  | 0.147 | 0.554 |
| miR-27a-5p       | 0.329  | 2.220  | 0.148 | 0.554 |
| miR-590-5p       | 0.371  | 0.651  | 0.149 | 0.554 |
| miR-92b-3p       | -0.346 | 3.086  | 0.151 | 0.556 |
| miR-3200-3p      | -0.439 | 0.193  | 0.153 | 0.556 |
| miR-501-3p       | -0.323 | 2.746  | 0.154 | 0.556 |

|              |        |        |       |       |
|--------------|--------|--------|-------|-------|
| miR-1273d    | -1.478 | 4.498  | 0.155 | 0.556 |
| miR-16-2-3p  | -0.272 | 3.631  | 0.156 | 0.556 |
| miR-340-5p   | 0.244  | 6.743  | 0.158 | 0.556 |
| miR-382-3p   | 0.367  | 3.232  | 0.159 | 0.556 |
| let-7f-1-3p  | -0.336 | 0.491  | 0.159 | 0.556 |
| miR-185-3p   | -0.222 | 4.607  | 0.159 | 0.556 |
| let-7i-3p    | -0.254 | 2.370  | 0.160 | 0.556 |
| miR-431-3p   | -0.343 | 0.193  | 0.161 | 0.556 |
| miR-375      | -0.564 | 2.730  | 0.161 | 0.556 |
| miR-3180-5p  | -0.853 | -0.295 | 0.161 | 0.556 |
| miR-545-5p   | 0.338  | 1.482  | 0.165 | 0.564 |
| miR-1273h-3p | -0.261 | 7.277  | 0.166 | 0.564 |
| miR-548ab    | 0.855  | 4.211  | 0.168 | 0.566 |
| miR-30c-1-3p | 0.129  | 2.582  | 0.169 | 0.566 |
| miR-92b-5p   | -0.536 | -0.009 | 0.169 | 0.566 |
| miR-1255a    | 0.392  | 4.833  | 0.171 | 0.570 |
| miR-423-5p   | -0.444 | 10.597 | 0.175 | 0.574 |
| miR-576-5p   | -0.183 | 6.414  | 0.175 | 0.574 |
| miR-126-3p   | 0.109  | 14.192 | 0.176 | 0.574 |
| miR-1307-5p  | -0.161 | 5.708  | 0.177 | 0.576 |
| miR-3180     | -0.899 | 0.868  | 0.180 | 0.578 |
| miR-3180-3p  | -0.899 | 0.868  | 0.180 | 0.578 |
| miR-423-3p   | -0.252 | 8.841  | 0.181 | 0.578 |
| miR-766-3p   | -0.179 | 5.380  | 0.183 | 0.582 |
| miR-378d     | -0.691 | 0.023  | 0.184 | 0.582 |
| miR-7-5p     | 0.181  | 10.227 | 0.190 | 0.598 |
| miR-138-5p   | -0.323 | 0.000  | 0.191 | 0.600 |
| miR-548am-3p | 1.170  | 2.613  | 0.194 | 0.604 |
| miR-106a-5p  | 0.226  | 1.761  | 0.196 | 0.606 |
| miR-548ay-5p | -0.201 | 13.403 | 0.197 | 0.607 |
| miR-378i     | -0.158 | 4.394  | 0.200 | 0.614 |
| miR-582-3p   | -0.385 | 1.716  | 0.201 | 0.614 |
| miR-30d-5p   | -0.090 | 11.785 | 0.203 | 0.614 |
| miR-25-5p    | -0.254 | 2.573  | 0.205 | 0.614 |
| miR-3928-3p  | -0.227 | 0.931  | 0.206 | 0.614 |
| miR-221-5p   | 0.114  | 5.310  | 0.209 | 0.614 |
| let-7b-5p    | -0.226 | 12.514 | 0.213 | 0.614 |
| miR-5193     | 0.191  | 1.173  | 0.214 | 0.614 |
| miR-3688-3p  | -0.227 | 1.689  | 0.214 | 0.614 |
| miR-223-5p   | -0.127 | 7.682  | 0.214 | 0.614 |
| miR-2115-3p  | -0.478 | 0.295  | 0.215 | 0.614 |
| miR-4732-5p  | -0.560 | 3.999  | 0.216 | 0.614 |
| miR-1908-5p  | -0.442 | 2.300  | 0.217 | 0.614 |
| miR-7641     | -0.356 | 5.298  | 0.218 | 0.614 |
| miR-582-5p   | -0.430 | 0.885  | 0.219 | 0.614 |
| miR-641      | 0.128  | 1.385  | 0.219 | 0.614 |
| miR-5009-5p  | -0.330 | 0.291  | 0.220 | 0.614 |
| miR-190b     | -0.101 | 3.267  | 0.221 | 0.614 |
| miR-3617-5p  | 0.260  | 0.442  | 0.221 | 0.614 |
| miR-9-3p     | 0.209  | 3.953  | 0.222 | 0.614 |
| miR-6511a-3p | 0.196  | 4.865  | 0.222 | 0.614 |
| miR-4446-3p  | 0.245  | 3.069  | 0.222 | 0.614 |
| miR-1233-3p  | 1.024  | -0.544 | 0.223 | 0.614 |
| miR-29a-3p   | -0.360 | 9.472  | 0.227 | 0.619 |
| miR-1250-5p  | -0.155 | 0.691  | 0.228 | 0.619 |
| let-7e-5p    | 0.217  | 9.484  | 0.229 | 0.619 |
| miR-548d-5p  | -0.185 | 12.885 | 0.229 | 0.619 |
| miR-487a-3p  | 0.382  | 0.530  | 0.237 | 0.638 |
| miR-193a-5p  | -0.485 | 3.243  | 0.243 | 0.648 |
| miR-548d-3p  | 0.454  | 1.169  | 0.243 | 0.648 |
| miR-130b-5p  | 0.165  | 5.414  | 0.246 | 0.648 |
| miR-497-5p   | -0.196 | 1.523  | 0.248 | 0.648 |
| miR-1972     | 2.620  | 5.510  | 0.249 | 0.648 |
| miR-6873-3p  | -0.289 | 5.014  | 0.249 | 0.648 |
| miR-4448     | -0.265 | 4.223  | 0.249 | 0.648 |
| miR-624-5p   | -0.302 | 0.116  | 0.250 | 0.648 |
| miR-374b-3p  | 0.198  | 1.235  | 0.254 | 0.655 |
| miR-20b-5p   | -0.151 | 5.620  | 0.254 | 0.655 |
| miR-495-5p   | -0.277 | -0.270 | 0.260 | 0.665 |
| miR-301b     | 0.174  | 1.088  | 0.261 | 0.665 |
| miR-24-3p    | -0.078 | 12.655 | 0.264 | 0.665 |
| miR-671-5p   | -0.210 | 4.210  | 0.264 | 0.665 |
| miR-548c-3p  | -0.556 | 2.905  | 0.266 | 0.665 |
| miR-429      | -0.167 | 0.270  | 0.267 | 0.665 |
| miR-2110     | -0.296 | 3.338  | 0.267 | 0.665 |
| miR-7849-3p  | 0.175  | 0.247  | 0.268 | 0.665 |
| miR-19b-3p   | -0.263 | 10.256 | 0.270 | 0.668 |
| miR-330-3p   | 0.090  | 3.864  | 0.272 | 0.670 |
| miR-376a-5p  | -0.350 | 0.104  | 0.274 | 0.672 |
| let-7g-3p    | -0.248 | 0.220  | 0.278 | 0.676 |
| miR-3613-5p  | -0.275 | 9.506  | 0.280 | 0.676 |
| miR-545-3p   | 0.217  | 1.909  | 0.281 | 0.676 |
| let-7g-5p    | 0.080  | 10.980 | 0.283 | 0.676 |
| miR-15a-5p   | -0.157 | 9.211  | 0.283 | 0.676 |
| miR-181d-5p  | 0.136  | 3.947  | 0.285 | 0.676 |
| miR-1307-3p  | -0.265 | 7.329  | 0.286 | 0.676 |
| miR-126-5p   | 0.166  | 11.057 | 0.286 | 0.676 |
| miR-574-3p   | 0.133  | 5.403  | 0.288 | 0.676 |
| miR-221-3p   | 0.102  | 11.513 | 0.288 | 0.676 |
| miR-362-5p   | -0.142 | 2.457  | 0.288 | 0.676 |
| miR-130b-3p  | 0.095  | 5.063  | 0.290 | 0.678 |
| miR-1271-5p  | -0.140 | 1.919  | 0.291 | 0.679 |
| miR-548e-5p  | -0.272 | 1.838  | 0.297 | 0.688 |
| miR-3065-3p  | -0.179 | 0.404  | 0.300 | 0.691 |
| miR-29a-5p   | 0.160  | 0.831  | 0.300 | 0.691 |
| miR-95-3p    | -0.236 | 2.108  | 0.303 | 0.695 |
| miR-30e-3p   | 0.149  | 7.059  | 0.305 | 0.695 |

|               |        |        |       |       |
|---------------|--------|--------|-------|-------|
| miR-31-5p     | -0.387 | 2.641  | 0.305 | 0.695 |
| miR-483-5p    | -0.617 | 1.834  | 0.315 | 0.712 |
| miR-144-5p    | -0.293 | 7.018  | 0.316 | 0.712 |
| miR-5010-5p   | -0.365 | 0.210  | 0.318 | 0.714 |
| miR-320a      | -0.232 | 11.779 | 0.320 | 0.717 |
| miR-1285-3p   | -0.156 | 8.508  | 0.322 | 0.718 |
| miR-5096      | -0.816 | 11.722 | 0.324 | 0.718 |
| miR-378a-3p   | -0.114 | 9.082  | 0.324 | 0.718 |
| miR-1246      | -0.379 | 5.861  | 0.326 | 0.718 |
| miR-320b      | -0.272 | 8.897  | 0.327 | 0.718 |
| miR-5585-3p   | -1.718 | 6.719  | 0.329 | 0.720 |
| miR-548a-5p   | 0.308  | 1.849  | 0.334 | 0.728 |
| miR-6516-5p   | 0.140  | 1.586  | 0.335 | 0.728 |
| miR-1468-5p   | 0.124  | 0.552  | 0.340 | 0.733 |
| miR-320c      | -0.261 | 8.553  | 0.340 | 0.733 |
| miR-3143      | -0.152 | -0.186 | 0.344 | 0.740 |
| miR-378c      | -0.129 | 5.108  | 0.346 | 0.740 |
| miR-18b-5p    | -0.162 | 2.410  | 0.348 | 0.741 |
| miR-191-5p    | 0.079  | 12.565 | 0.351 | 0.741 |
| miR-100-5p    | -0.311 | 2.346  | 0.351 | 0.741 |
| miR-186-5p    | -0.110 | 8.853  | 0.351 | 0.741 |
| miR-432-5p    | -0.256 | 7.959  | 0.352 | 0.741 |
| miR-125b-5p   | 0.136  | 8.080  | 0.356 | 0.742 |
| miR-6852-5p   | -0.223 | 2.746  | 0.357 | 0.742 |
| miR-143-5p    | 0.225  | 1.979  | 0.357 | 0.742 |
| let-7f-2-3p   | -0.257 | 0.250  | 0.358 | 0.742 |
| miR-504-5p    | 0.175  | 0.213  | 0.361 | 0.743 |
| miR-1185-2-3p | 0.249  | 0.123  | 0.361 | 0.743 |
| miR-1271-3p   | 0.667  | -0.768 | 0.367 | 0.749 |
| miR-671-3p    | -0.187 | 3.284  | 0.368 | 0.749 |
| miR-1255b-5p  | -0.217 | 7.593  | 0.368 | 0.749 |
| miR-125a-3p   | -0.189 | 0.692  | 0.369 | 0.749 |
| miR-1294      | -0.198 | 1.946  | 0.378 | 0.760 |
| miR-376a-3p   | 0.259  | 6.560  | 0.378 | 0.760 |
| miR-548f-5p   | -0.617 | 0.762  | 0.378 | 0.760 |
| miR-320d      | -0.202 | 7.345  | 0.381 | 0.761 |
| miR-548y      | -0.913 | -0.318 | 0.382 | 0.761 |
| miR-548e-3p   | 0.154  | 2.682  | 0.383 | 0.761 |
| miR-760       | -0.272 | 1.310  | 0.384 | 0.761 |
| miR-450b-5p   | -0.205 | 2.048  | 0.385 | 0.762 |
| let-7a-3p     | -0.213 | 4.497  | 0.387 | 0.762 |
| miR-376b-3p   | 0.260  | 3.330  | 0.392 | 0.770 |
| miR-431-5p    | -0.187 | 7.576  | 0.394 | 0.771 |
| miR-136-5p    | -0.235 | 2.770  | 0.397 | 0.771 |
| miR-151a-3p   | 0.064  | 12.424 | 0.398 | 0.771 |
| miR-29b-3p    | -0.212 | 9.739  | 0.398 | 0.771 |
| miR-182-5p    | -0.158 | 7.556  | 0.401 | 0.774 |
| miR-15b-3p    | -0.148 | 5.648  | 0.407 | 0.780 |
| miR-548ax     | 0.114  | 5.062  | 0.408 | 0.780 |
| miR-20a-3p    | 0.103  | 1.922  | 0.408 | 0.780 |
| miR-548as-5p  | 0.295  | 3.448  | 0.411 | 0.784 |
| miR-1290      | -0.334 | 4.532  | 0.418 | 0.795 |
| miR-452-5p    | -0.198 | 2.671  | 0.420 | 0.795 |
| miR-1299      | -0.665 | 4.630  | 0.421 | 0.795 |
| miR-374b-5p   | 0.150  | 6.920  | 0.430 | 0.810 |
| miR-4507      | 1.007  | 1.601  | 0.434 | 0.810 |
| miR-30c-5p    | 0.117  | 11.296 | 0.436 | 0.810 |
| miR-376c-3p   | 0.233  | 5.292  | 0.439 | 0.810 |
| miR-454-5p    | -0.061 | 3.780  | 0.440 | 0.810 |
| miR-199a-5p   | -0.111 | 8.817  | 0.442 | 0.810 |
| miR-1304-5p   | 0.685  | 0.167  | 0.444 | 0.810 |
| miR-6772-3p   | 0.171  | 0.690  | 0.445 | 0.810 |
| miR-4772-3p   | -0.276 | 1.699  | 0.445 | 0.810 |
| miR-483-3p    | -0.400 | 1.205  | 0.448 | 0.810 |
| miR-20a-5p    | 0.089  | 9.087  | 0.448 | 0.810 |
| miR-369-3p    | 0.240  | 4.919  | 0.449 | 0.810 |
| miR-411-5p    | 0.183  | 5.491  | 0.449 | 0.810 |
| miR-23a-5p    | -0.189 | 1.003  | 0.449 | 0.810 |
| miR-873-5p    | -0.269 | 1.352  | 0.450 | 0.810 |
| miR-4301      | -0.455 | 2.532  | 0.451 | 0.810 |
| let-7c-5p     | 0.099  | 9.528  | 0.455 | 0.815 |
| miR-29c-3p    | -0.183 | 8.568  | 0.461 | 0.816 |
| miR-329-3p    | -0.157 | 5.645  | 0.463 | 0.816 |
| miR-27a-3p    | -0.152 | 9.739  | 0.466 | 0.816 |
| miR-1229-3p   | 0.163  | 0.765  | 0.466 | 0.816 |
| let-7d-3p     | -0.066 | 6.419  | 0.467 | 0.816 |
| miR-3138      | -0.170 | 2.724  | 0.471 | 0.816 |
| miR-181a-5p   | -0.106 | 10.817 | 0.473 | 0.816 |
| miR-17-3p     | -0.089 | 3.215  | 0.473 | 0.816 |
| miR-548g-3p   | 0.711  | 1.192  | 0.473 | 0.816 |
| miR-153-3p    | 0.182  | 0.310  | 0.474 | 0.816 |
| miR-1306-5p   | -0.256 | 2.765  | 0.479 | 0.816 |
| miR-450a-5p   | -0.216 | 0.853  | 0.480 | 0.816 |
| miR-1273g-3p  | -1.238 | 11.153 | 0.481 | 0.816 |
| miR-548aa     | -0.229 | 10.786 | 0.481 | 0.816 |
| miR-548t-3p   | -0.229 | 10.786 | 0.481 | 0.816 |
| miR-548f-3p   | 0.207  | 5.197  | 0.481 | 0.816 |
| miR-503-5p    | -0.112 | 3.907  | 0.481 | 0.816 |
| miR-548ap-3p  | -0.231 | 10.374 | 0.482 | 0.816 |
| miR-142-5p    | -0.126 | 10.854 | 0.482 | 0.816 |
| miR-1260b     | 0.105  | 3.783  | 0.485 | 0.816 |
| miR-181a-2-3p | 0.073  | 5.645  | 0.486 | 0.816 |
| miR-1268a     | -0.657 | 3.542  | 0.487 | 0.816 |
| miR-4326      | -0.270 | 1.874  | 0.489 | 0.816 |
| miR-154-5p    | -0.214 | 3.881  | 0.490 | 0.816 |
| miR-143-3p    | 0.167  | 9.208  | 0.490 | 0.816 |
| miR-9-5p      | 0.117  | 5.867  | 0.493 | 0.816 |

|               |        |        |       |       |
|---------------|--------|--------|-------|-------|
| miR-342-3p    | -0.109 | 10.283 | 0.493 | 0.816 |
| miR-210-3p    | -0.083 | 2.393  | 0.495 | 0.816 |
| miR-548a-3p   | 0.130  | 5.676  | 0.496 | 0.816 |
| miR-3194-3p   | -0.309 | 0.002  | 0.498 | 0.817 |
| miR-2355-5p   | -0.150 | 0.457  | 0.501 | 0.819 |
| miR-381-3p    | -0.152 | 5.537  | 0.502 | 0.819 |
| miR-548h-3p   | -0.265 | 8.937  | 0.505 | 0.819 |
| miR-548z      | -0.265 | 8.937  | 0.505 | 0.819 |
| miR-1268b     | 0.419  | 0.512  | 0.512 | 0.827 |
| miR-487a-5p   | 0.159  | 0.384  | 0.513 | 0.827 |
| miR-22-5p     | 0.089  | 3.999  | 0.514 | 0.827 |
| miR-191-3p    | -0.065 | 3.805  | 0.522 | 0.837 |
| miR-218-5p    | -0.374 | 1.231  | 0.523 | 0.837 |
| miR-889-3p    | 0.169  | 3.340  | 0.525 | 0.837 |
| miR-1301-3p   | -0.122 | 5.720  | 0.528 | 0.837 |
| miR-619-5p    | 0.709  | 11.202 | 0.529 | 0.837 |
| miR-377-5p    | -0.152 | -0.095 | 0.531 | 0.837 |
| miR-140-5p    | -0.072 | 6.331  | 0.531 | 0.837 |
| miR-3161      | 0.517  | -0.951 | 0.532 | 0.837 |
| miR-09b-3p    | 0.130  | 2.773  | 0.533 | 0.837 |
| miR-548o-3p   | -0.280 | 2.775  | 0.537 | 0.840 |
| miR-548x-3p   | 0.760  | 2.828  | 0.537 | 0.840 |
| miR-299-3p    | 0.190  | 0.096  | 0.539 | 0.840 |
| miR-625-3p    | 0.114  | 6.770  | 0.541 | 0.840 |
| miR-6500-3p   | 0.374  | -0.223 | 0.543 | 0.840 |
| miR-134-5p    | 0.162  | 7.091  | 0.543 | 0.840 |
| miR-29e-5p    | -0.053 | 4.579  | 0.549 | 0.845 |
| miR-3187-3p   | -0.138 | 0.369  | 0.550 | 0.845 |
| miR-485-5p    | -0.194 | 3.492  | 0.551 | 0.845 |
| miR-6859-5p   | -0.135 | 3.735  | 0.554 | 0.847 |
| miR-215-5p    | 0.120  | 2.194  | 0.557 | 0.848 |
| miR-18a-5p    | 0.060  | 7.212  | 0.559 | 0.848 |
| miR-548aq-3p  | 0.109  | 9.450  | 0.560 | 0.848 |
| miR-548q      | 0.122  | 4.336  | 0.561 | 0.848 |
| miR-185-5p    | 0.044  | 9.811  | 0.562 | 0.848 |
| miR-4477b     | 0.180  | 0.399  | 0.564 | 0.848 |
| miR-1302      | 0.605  | 2.800  | 0.567 | 0.848 |
| miR-99a-5p    | -0.097 | 4.162  | 0.568 | 0.848 |
| miR-3605-3p   | -0.128 | 1.394  | 0.572 | 0.848 |
| miR-5095      | 1.128  | 8.523  | 0.573 | 0.848 |
| miR-328-3p    | -0.123 | 5.945  | 0.575 | 0.848 |
| miR-7851-3p   | -0.174 | 3.495  | 0.577 | 0.848 |
| miR-329-5p    | -0.149 | 2.442  | 0.581 | 0.848 |
| miR-6741-3p   | 0.153  | 0.231  | 0.582 | 0.848 |
| miR-125a-5p   | 0.119  | 9.141  | 0.583 | 0.848 |
| miR-548b-5p   | 0.111  | 7.793  | 0.584 | 0.848 |
| miR-99b-5p    | 0.103  | 7.865  | 0.585 | 0.848 |
| miR-324-5p    | -0.048 | 5.454  | 0.588 | 0.848 |
| miR-3198      | -0.168 | 0.544  | 0.589 | 0.848 |
| miR-424-3p    | -0.097 | 0.968  | 0.589 | 0.848 |
| miR-197-3p    | -0.073 | 6.745  | 0.590 | 0.848 |
| miR-299-5p    | 0.123  | 2.468  | 0.590 | 0.848 |
| miR-598-3p    | -0.113 | 4.565  | 0.590 | 0.848 |
| miR-1285-5p   | 0.259  | 8.438  | 0.591 | 0.848 |
| miR-548j-3p   | 0.149  | 0.393  | 0.592 | 0.848 |
| miR-494-3p    | 0.130  | 5.857  | 0.595 | 0.848 |
| miR-548k      | 0.068  | 1.443  | 0.595 | 0.848 |
| miR-3179      | 0.206  | -0.272 | 0.596 | 0.848 |
| miR-1270      | -0.143 | 3.003  | 0.597 | 0.848 |
| miR-379-3p    | 0.129  | 1.468  | 0.597 | 0.848 |
| miR-548t-5p   | -0.150 | 1.936  | 0.602 | 0.848 |
| miR-379-5p    | 0.116  | 7.187  | 0.602 | 0.848 |
| miR-195-5p    | 0.073  | 3.376  | 0.603 | 0.848 |
| miR-3620-5p   | 0.390  | 3.024  | 0.604 | 0.848 |
| miR-33a-5p    | 0.097  | 1.653  | 0.605 | 0.848 |
| miR-142-3p    | 0.070  | 13.185 | 0.608 | 0.849 |
| miR-21-5p     | 0.080  | 12.294 | 0.608 | 0.849 |
| miR-3064-5p   | 0.060  | 0.924  | 0.610 | 0.850 |
| miR-146a-3p   | 0.565  | 2.291  | 0.613 | 0.850 |
| miR-4435      | -0.119 | 1.570  | 0.614 | 0.850 |
| miR-548n      | 0.073  | 4.212  | 0.615 | 0.850 |
| miR-548av-5p  | 0.064  | 1.444  | 0.617 | 0.851 |
| miR-181b-3p   | -0.159 | 0.083  | 0.620 | 0.853 |
| miR-487b-5p   | -0.121 | 0.849  | 0.621 | 0.853 |
| miR-330-5p    | -0.036 | 3.616  | 0.628 | 0.860 |
| miR-32-5p     | 0.084  | 5.289  | 0.631 | 0.860 |
| miR-2355-3p   | -0.050 | 3.959  | 0.632 | 0.860 |
| miR-107       | -0.041 | 10.028 | 0.633 | 0.860 |
| miR-7-1-3p    | 0.078  | 2.452  | 0.634 | 0.860 |
| miR-744-3p    | -0.132 | -0.457 | 0.638 | 0.863 |
| miR-190a-5p   | 0.077  | 5.571  | 0.642 | 0.864 |
| miR-3173-5p   | -0.137 | 1.011  | 0.644 | 0.864 |
| miR-342-5p    | 0.074  | 3.944  | 0.647 | 0.864 |
| miR-6803-3p   | -0.148 | -0.112 | 0.647 | 0.864 |
| miR-1         | -0.163 | 8.318  | 0.647 | 0.864 |
| miR-3960      | -0.367 | 3.467  | 0.648 | 0.864 |
| miR-628-3p    | 0.053  | 5.661  | 0.649 | 0.864 |
| miR-146b-5p   | 0.070  | 9.310  | 0.650 | 0.864 |
| miR-106b-5p   | 0.097  | 4.658  | 0.652 | 0.865 |
| miR-6842-3p   | -0.061 | 1.371  | 0.658 | 0.867 |
| miR-98-3p     | -0.108 | 0.779  | 0.659 | 0.867 |
| miR-625-3p    | -0.098 | 8.394  | 0.660 | 0.867 |
| miR-132-3p    | -0.048 | 3.504  | 0.660 | 0.867 |
| miR-103a-2-5p | 0.126  | -0.340 | 0.661 | 0.867 |
| miR-4742-3p   | 0.068  | 1.378  | 0.662 | 0.867 |
| miR-4433b-3p  | -0.137 | 2.351  | 0.664 | 0.867 |
| miR-885-5p    | -0.203 | 0.498  | 0.670 | 0.874 |



|               |        |        |       |       |
|---------------|--------|--------|-------|-------|
| miR-551b-3p   | 0.079  | 1.815  | 0.674 | 0.875 |
| miR-548i      | -0.250 | 3.203  | 0.675 | 0.875 |
| miR-3133      | -0.280 | -0.564 | 0.688 | 0.880 |
| miR-548aj-5p  | -0.202 | 7.504  | 0.689 | 0.880 |
| miR-548g-5p   | -0.202 | 7.504  | 0.689 | 0.880 |
| miR-548x-5p   | -0.202 | 7.504  | 0.689 | 0.880 |
| miR-543       | 0.081  | 3.379  | 0.689 | 0.880 |
| miR-181c-3p   | -0.053 | 3.538  | 0.689 | 0.880 |
| miR-148b-5p   | -0.035 | 2.775  | 0.690 | 0.880 |
| miR-1179      | -0.051 | 1.832  | 0.693 | 0.880 |
| miR-4662a-5p  | 0.072  | 1.907  | 0.693 | 0.880 |
| miR-181a-3p   | 0.070  | 4.944  | 0.693 | 0.880 |
| let-7i-5p     | 0.033  | 13.259 | 0.701 | 0.886 |
| miR-122-5p    | -0.203 | 11.047 | 0.703 | 0.886 |
| miR-548ar-5p  | -0.201 | 7.739  | 0.706 | 0.886 |
| miR-101-3p    | -0.058 | 11.459 | 0.706 | 0.886 |
| miR-145-5p    | -0.073 | 6.318  | 0.709 | 0.886 |
| miR-487b-3p   | -0.084 | 5.402  | 0.710 | 0.886 |
| miR-377-3p    | 0.093  | 2.438  | 0.712 | 0.886 |
| miR-23b-5p    | -0.071 | 1.691  | 0.713 | 0.886 |
| miR-548ah-3p  | 0.227  | 2.757  | 0.715 | 0.886 |
| miR-19b-1-5p  | 0.046  | 0.495  | 0.716 | 0.886 |
| miR-548p      | 0.203  | 1.823  | 0.717 | 0.886 |
| miR-548ai     | 0.297  | 0.527  | 0.718 | 0.886 |
| miR-570-5p    | 0.297  | 0.527  | 0.718 | 0.886 |
| miR-141-3p    | -0.060 | 3.127  | 0.720 | 0.888 |
| miR-222-3p    | -0.036 | 8.603  | 0.726 | 0.893 |
| miR-548aq-5p  | 0.291  | 2.543  | 0.731 | 0.897 |
| let-7a-5p     | 0.049  | 17.835 | 0.733 | 0.898 |
| miR-1185-1-3p | 0.082  | 3.358  | 0.740 | 0.900 |
| miR-323a-3p   | -0.069 | 4.078  | 0.740 | 0.900 |
| miR-301a-3p   | 0.039  | 5.377  | 0.740 | 0.900 |
| miR-200a-3p   | 0.039  | 2.514  | 0.746 | 0.904 |
| miR-409-3p    | 0.074  | 8.698  | 0.747 | 0.904 |
| miR-27b-5p    | 0.044  | 1.148  | 0.748 | 0.904 |
| miR-181c-5p   | 0.056  | 3.046  | 0.749 | 0.904 |
| miR-496       | 0.086  | 1.970  | 0.756 | 0.910 |
| miR-6511b-3p  | 0.053  | 2.078  | 0.757 | 0.910 |
| miR-1185-5p   | 0.090  | 2.420  | 0.762 | 0.911 |
| miR-421       | 0.021  | 5.199  | 0.764 | 0.911 |
| let-7d-5p     | 0.036  | 10.427 | 0.764 | 0.911 |
| miR-1304-3p   | -0.211 | 3.254  | 0.767 | 0.911 |
| miR-1287-5p   | 0.033  | 3.050  | 0.770 | 0.911 |
| miR-337-5p    | -0.074 | 3.963  | 0.772 | 0.911 |
| miR-200b-3p   | -0.036 | 2.188  | 0.772 | 0.911 |
| miR-29b-1-5p  | -0.050 | 0.138  | 0.773 | 0.911 |
| miR-505-5p    | 0.056  | 3.558  | 0.774 | 0.911 |
| miR-548ag     | -0.063 | 6.333  | 0.775 | 0.911 |
| miR-544a      | -0.137 | 0.669  | 0.776 | 0.911 |
| miR-382-5p    | 0.070  | 8.383  | 0.778 | 0.911 |
| miR-548h-5p   | 0.110  | 6.935  | 0.780 | 0.911 |
| miR-3140-3p   | -0.044 | 0.699  | 0.780 | 0.911 |
| miR-556-3p    | 0.056  | 1.254  | 0.781 | 0.911 |
| miR-4454      | 0.065  | 9.159  | 0.783 | 0.912 |
| miR-574-5p    | -0.198 | 14.568 | 0.786 | 0.913 |
| miR-4659a-3p  | 0.047  | 0.124  | 0.795 | 0.921 |
| miR-4433b-5p  | 0.064  | 7.929  | 0.797 | 0.923 |
| miR-942-5p    | -0.022 | 4.976  | 0.807 | 0.932 |
| miR-509-3p    | -0.079 | 2.288  | 0.808 | 0.932 |
| miR-378f      | -0.037 | 1.820  | 0.811 | 0.933 |
| miR-376b-5p   | 0.094  | 1.487  | 0.812 | 0.933 |
| miR-376c-5p   | 0.091  | 1.518  | 0.816 | 0.933 |
| miR-19a-3p    | 0.044  | 5.810  | 0.817 | 0.933 |
| miR-128-3p    | 0.019  | 10.346 | 0.818 | 0.933 |
| miR-651-5p    | 0.044  | 1.314  | 0.819 | 0.933 |
| miR-576-3p    | 0.024  | 5.501  | 0.821 | 0.933 |
| miR-139-3p    | -0.064 | 4.524  | 0.822 | 0.933 |
| miR-127-3p    | -0.047 | 7.007  | 0.824 | 0.934 |
| miR-589-3p    | 0.024  | 1.137  | 0.827 | 0.935 |
| miR-3913-5p   | 0.029  | 2.448  | 0.834 | 0.940 |
| miR-542-3p    | -0.052 | 2.341  | 0.835 | 0.940 |
| miR-7110-3p   | 0.063  | -0.067 | 0.839 | 0.941 |
| miR-1226-3p   | 0.043  | 1.073  | 0.840 | 0.941 |
| miR-664a-5p   | -0.033 | 5.295  | 0.840 | 0.941 |
| miR-1306-3p   | 0.035  | 2.215  | 0.842 | 0.941 |
| miR-323b-3p   | -0.044 | 4.932  | 0.846 | 0.941 |
| miR-877-5p    | 0.019  | 2.378  | 0.846 | 0.941 |
| miR-548an     | 0.077  | 1.688  | 0.847 | 0.941 |
| miR-335-3p    | -0.030 | 5.333  | 0.858 | 0.951 |
| miR-23c       | 0.021  | 0.292  | 0.859 | 0.951 |
| miR-127-5p    | 0.040  | 1.654  | 0.867 | 0.958 |
| miR-548ak     | 0.119  | 2.923  | 0.881 | 0.967 |
| miR-708-5p    | 0.090  | 2.615  | 0.882 | 0.967 |
| miR-132-5p    | 0.019  | 0.644  | 0.883 | 0.967 |
| miR-136-3p    | 0.052  | 3.534  | 0.886 | 0.967 |
| miR-758-3p    | 0.036  | 1.734  | 0.887 | 0.967 |
| miR-664b-5p   | -0.031 | 1.474  | 0.888 | 0.967 |
| miR-485-3p    | 0.047  | 5.831  | 0.889 | 0.967 |
| miR-584-5p    | -0.020 | 9.252  | 0.889 | 0.967 |
| miR-30b-5p    | 0.040  | 7.651  | 0.892 | 0.967 |
| miR-505-3p    | -0.010 | 4.359  | 0.893 | 0.967 |
| miR-548av-3p  | -0.055 | 3.903  | 0.893 | 0.967 |
| miR-654-3p    | 0.029  | 7.125  | 0.900 | 0.968 |
| miR-4659b-3p  | 0.017  | 0.948  | 0.901 | 0.968 |
| miR-23a-3p    | 0.010  | 11.962 | 0.904 | 0.968 |
| miR-145-3p    | 0.024  | 1.763  | 0.905 | 0.968 |
| miR-548ae     | 0.165  | 3.953  | 0.905 | 0.968 |

|                                   |                        |                               |                |                         |
|-----------------------------------|------------------------|-------------------------------|----------------|-------------------------|
| miR-493-5p                        | 0.027                  | 5.498                         | 0.905          | 0.968                   |
| miR-378g                          | 0.033                  | 0.027                         | 0.905          | 0.968                   |
| miR-5187-5p                       | 0.024                  | 2.108                         | 0.910          | 0.969                   |
| miR-5189-3p                       | 0.046                  | 0.435                         | 0.911          | 0.969                   |
| miR-6859-3p                       | -0.055                 | 0.719                         | 0.912          | 0.969                   |
| miR-584-3p                        | -0.019                 | 0.426                         | 0.913          | 0.969                   |
| miR-877-3p                        | 0.039                  | 2.150                         | 0.916          | 0.970                   |
| miR-1249                          | 0.032                  | 0.351                         | 0.919          | 0.970                   |
| miR-493-3p                        | -0.023                 | 5.508                         | 0.919          | 0.970                   |
| miR-15b-5p                        | 0.013                  | 9.487                         | 0.928          | 0.978                   |
| miR-369-5p                        | 0.018                  | 5.217                         | 0.932          | 0.980                   |
| miR-548al                         | 0.066                  | -0.392                        | 0.936          | 0.983                   |
| miR-301a-5p                       | -0.015                 | 1.602                         | 0.940          | 0.983                   |
| miR-5010-3p                       | -0.008                 | 1.408                         | 0.942          | 0.983                   |
| miR-6734-5p                       | -0.016                 | 0.555                         | 0.946          | 0.983                   |
| miR-2277-5p                       | 0.035                  | 0.413                         | 0.947          | 0.983                   |
| miR-655-3p                        | 0.025                  | -0.112                        | 0.948          | 0.983                   |
| miR-3074-5p                       | -0.017                 | 1.854                         | 0.949          | 0.983                   |
| miR-361-5p                        | -0.004                 | 8.171                         | 0.950          | 0.983                   |
| miR-548az-5p                      | 0.025                  | 5.839                         | 0.951          | 0.983                   |
| miR-28-3p                         | 0.005                  | 10.686                        | 0.954          | 0.983                   |
| miR-744-5p                        | -0.010                 | 7.986                         | 0.956          | 0.983                   |
| miR-219a-5p                       | 0.013                  | 1.164                         | 0.957          | 0.983                   |
| miR-3065-5p                       | -0.008                 | 2.573                         | 0.958          | 0.983                   |
| miR-548l                          | -0.008                 | 1.877                         | 0.959          | 0.983                   |
| miR-548at-5p                      | 0.013                  | 4.401                         | 0.959          | 0.983                   |
| miR-30d-3p                        | 0.005                  | 1.671                         | 0.974          | 0.994                   |
| miR-337-3p                        | 0.009                  | 2.407                         | 0.975          | 0.994                   |
| miR-30a-3p                        | -0.003                 | 3.079                         | 0.976          | 0.994                   |
| miR-6511a-5p                      | -0.016                 | 1.038                         | 0.980          | 0.994                   |
| miR-1273h-5p                      | -0.004                 | 11.451                        | 0.983          | 0.994                   |
| miR-433-3p                        | -0.005                 | 1.880                         | 0.984          | 0.994                   |
| miR-652-3p                        | -0.002                 | 7.109                         | 0.985          | 0.994                   |
| miR-1273c                         | 0.003                  | 1.024                         | 0.986          | 0.994                   |
| miR-148a-3p                       | -0.002                 | 10.002                        | 0.986          | 0.994                   |
| miR-6511b-5p                      | 0.010                  | 1.158                         | 0.987          | 0.994                   |
| miR-409-5p                        | 0.002                  | 3.705                         | 0.990          | 0.996                   |
| miR-6770-3p                       | -0.003                 | 0.142                         | 0.992          | 0.996                   |
| miR-548w                          | 0.003                  | 5.896                         | 0.994          | 0.996                   |
| miR-27b-3p                        | 0.000                  | 10.051                        | 0.998          | 0.998                   |
| <b>miRNA</b>                      | <b>log-fold change</b> | <b>log-counts per million</b> | <b>p-value</b> | <b>adjusted p-value</b> |
| <b>Presymptomatic vs. Patient</b> |                        |                               |                |                         |
| miR-345-5p                        | -0.528                 | 4.607                         | 3.610E-05      | 0.021                   |
| miR-205-5p                        | -1.421                 | 2.270                         | 0.000          | 0.065                   |
| miR-206                           | -2.218                 | 1.104                         | 0.000          | 0.065                   |
| miR-18a-3p                        | -0.586                 | 2.363                         | 0.001          | 0.083                   |
| miR-93-3p                         | -0.426                 | 4.195                         | 0.001          | 0.083                   |
| miR-106b-3p                       | -0.477                 | 6.995                         | 0.001          | 0.083                   |
| miR-548am-c-o-5p                  | 0.497                  | 14.295                        | 0.001          | 0.083                   |
| miR-548au-5p                      | 0.480                  | 14.473                        | 0.001          | 0.083                   |
| miR-551a                          | -1.098                 | -0.321                        | 0.002          | 0.097                   |
| miR-218-5p                        | -1.849                 | 1.231                         | 0.002          | 0.097                   |
| miR-542-5p                        | -0.709                 | 1.306                         | 0.002          | 0.097                   |
| let-7b-3p                         | -0.484                 | 1.579                         | 0.003          | 0.137                   |
| miR-151a-5p                       | 0.394                  | 11.573                        | 0.004          | 0.150                   |
| miR-151b                          | 0.389                  | 11.596                        | 0.004          | 0.150                   |
| miR-223-3p                        | -0.300                 | 14.649                        | 0.005          | 0.190                   |
| miR-374a-3p                       | 0.627                  | 2.987                         | 0.005          | 0.190                   |
| miR-130a-3p                       | 0.399                  | 7.658                         | 0.005          | 0.190                   |
| miR-375                           | -1.131                 | 2.730                         | 0.006          | 0.195                   |
| miR-1303                          | -1.405                 | 4.458                         | 0.007          | 0.224                   |
| miR-148a-5p                       | -0.428                 | 0.933                         | 0.009          | 0.224                   |
| miR-548u                          | 1.339                  | 1.210                         | 0.009          | 0.224                   |
| miR-10b-5p                        | -0.741                 | 4.540                         | 0.009          | 0.224                   |
| miR-17-5p                         | 0.416                  | 8.427                         | 0.009          | 0.224                   |
| miR-618                           | -1.220                 | -0.303                        | 0.010          | 0.224                   |
| miR-25-3p                         | -0.293                 | 10.901                        | 0.010          | 0.224                   |
| miR-3615                          | -0.822                 | 5.538                         | 0.010          | 0.224                   |
| miR-625-3p                        | -0.593                 | 8.394                         | 0.010          | 0.224                   |
| miR-154-3p                        | 0.944                  | 0.419                         | 0.011          | 0.224                   |
| miR-26b-5p                        | 0.296                  | 12.787                        | 0.012          | 0.226                   |
| miR-378a-5p                       | -0.478                 | 2.841                         | 0.012          | 0.226                   |
| miR-550a-3p                       | -0.674                 | 3.973                         | 0.012          | 0.226                   |
| miR-590-5p                        | 0.686                  | 0.651                         | 0.013          | 0.232                   |
| miR-941                           | -0.475                 | 9.475                         | 0.015          | 0.232                   |
| miR-616-3p                        | -0.532                 | 0.543                         | 0.015          | 0.232                   |
| miR-331-3p                        | 0.332                  | 4.398                         | 0.015          | 0.232                   |
| miR-10a-3p                        | 0.428                  | 1.500                         | 0.016          | 0.232                   |
| miR-365a-3p                       | -0.696                 | 4.151                         | 0.016          | 0.232                   |
| miR-365b-3p                       | -0.696                 | 4.151                         | 0.016          | 0.232                   |
| miR-502-3p                        | -0.330                 | 3.800                         | 0.016          | 0.232                   |
| miR-340-5p                        | 0.441                  | 6.743                         | 0.016          | 0.232                   |
| miR-487a-3p                       | 0.824                  | 0.530                         | 0.017          | 0.232                   |
| miR-374a-5p                       | 0.488                  | 7.594                         | 0.017          | 0.232                   |
| miR-224-5p                        | -0.706                 | 7.850                         | 0.017          | 0.232                   |
| miR-148b-3p                       | 0.301                  | 9.436                         | 0.018          | 0.232                   |
| miR-550a-3-5p                     | -0.436                 | 2.398                         | 0.018          | 0.232                   |
| miR-532-3p                        | -0.462                 | 2.783                         | 0.019          | 0.237                   |
| miR-590-3p                        | 0.630                  | 6.770                         | 0.019          | 0.237                   |
| miR-340-3p                        | 0.235                  | 3.655                         | 0.021          | 0.240                   |
| miR-183-5p                        | -0.695                 | 5.546                         | 0.022          | 0.240                   |
| miR-629-5p                        | -0.370                 | 6.404                         | 0.023          | 0.240                   |

|              |        |        |       |       |
|--------------|--------|--------|-------|-------|
| miR-539-3p   | 0.815  | 1.473  | 0.023 | 0.240 |
| miR-7976     | -0.387 | 1.801  | 0.023 | 0.240 |
| miR-1289     | -1.074 | -0.148 | 0.023 | 0.240 |
| miR-642a-3p  | -0.683 | 0.484  | 0.024 | 0.240 |
| miR-628-5p   | 0.286  | 4.677  | 0.024 | 0.240 |
| miR-100-5p   | -0.778 | 2.346  | 0.025 | 0.240 |
| miR-200c-3p  | 0.183  | 5.273  | 0.025 | 0.240 |
| miR-6873-3p  | -0.586 | 5.014  | 0.025 | 0.240 |
| miR-92a-3p   | -0.495 | 13.677 | 0.025 | 0.240 |
| miR-223-5p   | -0.246 | 7.682  | 0.025 | 0.240 |
| miR-203a     | -0.610 | -0.173 | 0.026 | 0.240 |
| miR-146a-5p  | 0.232  | 12.934 | 0.026 | 0.240 |
| miR-28-5p    | 0.196  | 6.656  | 0.026 | 0.240 |
| let-7f-5p    | 0.224  | 16.225 | 0.028 | 0.259 |
| miR-7706     | -0.588 | -0.037 | 0.030 | 0.264 |
| miR-3120-3p  | 0.288  | 2.583  | 0.030 | 0.264 |
| miR-378i     | -0.285 | 4.394  | 0.030 | 0.264 |
| miR-589-5p   | -0.253 | 3.684  | 0.031 | 0.264 |
| miR-484      | -0.502 | 7.854  | 0.031 | 0.264 |
| miR-382-3p   | 0.578  | 3.232  | 0.032 | 0.269 |
| miR-1277-3p  | 0.473  | 1.948  | 0.032 | 0.269 |
| miR-32-3p    | 0.424  | 0.143  | 0.033 | 0.270 |
| miR-1277-5p  | 0.463  | 12.138 | 0.033 | 0.270 |
| miR-376b-3p  | 0.671  | 3.330  | 0.034 | 0.270 |
| miR-133a-3p  | -0.671 | 7.345  | 0.034 | 0.270 |
| miR-4677-3p  | 0.374  | 0.746  | 0.036 | 0.271 |
| miR-9-3p     | 0.380  | 3.953  | 0.037 | 0.271 |
| miR-545-5p   | 0.537  | 1.482  | 0.037 | 0.271 |
| miR-139-5p   | 0.454  | 6.068  | 0.038 | 0.271 |
| miR-92b-5p   | -0.857 | -0.009 | 0.039 | 0.271 |
| miR-369-3p   | 0.685  | 4.919  | 0.039 | 0.271 |
| miR-92b-3p   | -0.530 | 3.086  | 0.040 | 0.271 |
| miR-3928-3p  | -0.393 | 0.931  | 0.040 | 0.271 |
| let-7b-5p    | -0.395 | 12.514 | 0.040 | 0.271 |
| miR-296-5p   | -0.499 | 1.358  | 0.040 | 0.271 |
| miR-514a-3p  | 0.933  | 0.606  | 0.040 | 0.271 |
| miR-25-5p    | -0.435 | 2.573  | 0.041 | 0.271 |
| miR-576-5p   | -0.290 | 6.414  | 0.042 | 0.271 |
| miR-7641     | -0.638 | 5.298  | 0.042 | 0.271 |
| miR-301b     | 0.333  | 1.088  | 0.043 | 0.271 |
| miR-196b-5p  | 0.190  | 5.658  | 0.043 | 0.271 |
| miR-500a-3p  | -0.248 | 4.766  | 0.043 | 0.271 |
| miR-451a     | -0.491 | 11.183 | 0.044 | 0.271 |
| miR-153-3p   | 0.543  | 0.310  | 0.044 | 0.271 |
| miR-652-5p   | 0.405  | 1.446  | 0.044 | 0.271 |
| miR-425-3p   | -0.182 | 6.606  | 0.045 | 0.271 |
| miR-193a-5p  | -0.874 | 3.243  | 0.045 | 0.271 |
| miR-412-5p   | 1.044  | 2.206  | 0.045 | 0.271 |
| miR-374b-3p  | 0.372  | 1.235  | 0.046 | 0.271 |
| miR-539-5p   | 0.706  | 0.162  | 0.046 | 0.271 |
| miR-199a-3p  | 0.283  | 15.594 | 0.047 | 0.271 |
| miR-199b-3p  | 0.283  | 15.594 | 0.047 | 0.271 |
| miR-550a-5p  | -0.401 | 1.899  | 0.048 | 0.274 |
| miR-142-3p   | 0.288  | 13.185 | 0.048 | 0.274 |
| miR-140-3p   | -0.166 | 9.249  | 0.050 | 0.278 |
| miR-425-5p   | -0.210 | 10.913 | 0.050 | 0.278 |
| miR-32-5p    | 0.365  | 5.289  | 0.051 | 0.278 |
| miR-501-3p   | -0.470 | 2.746  | 0.051 | 0.278 |
| miR-125a-3p  | -0.437 | 0.692  | 0.052 | 0.279 |
| miR-362-5p   | -0.275 | 2.457  | 0.053 | 0.283 |
| miR-4732-3p  | -0.921 | 3.928  | 0.053 | 0.283 |
| miR-197-3p   | -0.280 | 6.745  | 0.054 | 0.284 |
| miR-23b-5p   | -0.398 | 1.691  | 0.054 | 0.284 |
| miR-335-5p   | 0.338  | 7.461  | 0.055 | 0.284 |
| miR-1180-3p  | -0.775 | 2.024  | 0.056 | 0.287 |
| miR-26a-5p   | 0.175  | 15.391 | 0.057 | 0.291 |
| miR-641      | 0.209  | 1.385  | 0.058 | 0.291 |
| miR-423-3p   | -0.376 | 8.841  | 0.059 | 0.293 |
| miR-548aq-3p | 0.374  | 9.450  | 0.059 | 0.293 |
| miR-5010-3p  | -0.214 | 1.408  | 0.060 | 0.293 |
| miR-486-5p   | -0.676 | 14.249 | 0.060 | 0.293 |
| let-7d-3p    | -0.182 | 6.419  | 0.061 | 0.293 |
| miR-495-3p   | 0.483  | 3.399  | 0.064 | 0.307 |
| miR-3679-5p  | -0.380 | 2.384  | 0.069 | 0.318 |
| miR-769-3p   | -0.392 | 0.674  | 0.070 | 0.318 |
| miR-3613-5p  | -0.498 | 9.506  | 0.070 | 0.318 |
| miR-320c     | -0.521 | 8.553  | 0.070 | 0.318 |
| miR-301a-3p  | 0.225  | 5.377  | 0.070 | 0.318 |
| miR-4685-3p  | -0.560 | 0.669  | 0.072 | 0.318 |
| miR-532-5p   | -0.246 | 5.499  | 0.072 | 0.318 |
| miR-2115-3p  | -0.721 | 0.295  | 0.072 | 0.318 |
| miR-320b     | -0.524 | 8.897  | 0.073 | 0.318 |
| miR-769-5p   | -0.123 | 4.654  | 0.073 | 0.318 |
| miR-150-3p   | -0.511 | 1.296  | 0.073 | 0.318 |
| miR-548h-5p  | 0.779  | 6.935  | 0.074 | 0.318 |
| miR-545-3p   | 0.383  | 1.909  | 0.074 | 0.318 |
| miR-18a-5p   | 0.197  | 7.212  | 0.075 | 0.318 |
| miR-33a-5p   | 0.358  | 1.653  | 0.075 | 0.318 |
| miR-548ab    | 1.175  | 4.211  | 0.076 | 0.318 |
| miR-361-3p   | -0.176 | 6.970  | 0.076 | 0.318 |
| miR-324-3p   | -0.176 | 4.372  | 0.077 | 0.319 |

|               |        |        |       |       |
|---------------|--------|--------|-------|-------|
| miR-889-3p    | 0.491  | 3.340  | 0.077 | 0.319 |
| miR-93-5p     | -0.132 | 11.309 | 0.078 | 0.319 |
| miR-133b      | -0.707 | -0.138 | 0.078 | 0.319 |
| miR-3158-3p   | -0.626 | 1.499  | 0.079 | 0.321 |
| miR-204-5p    | 0.480  | 1.457  | 0.082 | 0.327 |
| miR-6852-5p   | -0.445 | 2.746  | 0.083 | 0.327 |
| miR-106a-5p   | 0.324  | 1.761  | 0.084 | 0.327 |
| miR-486-3p    | -0.521 | 5.430  | 0.084 | 0.327 |
| miR-4785      | -0.266 | 0.526  | 0.084 | 0.327 |
| miR-320d      | -0.422 | 7.345  | 0.084 | 0.327 |
| miR-548d-3p   | 0.731  | 1.169  | 0.084 | 0.327 |
| miR-361-5p    | -0.128 | 8.171  | 0.085 | 0.328 |
| miR-378a-3p   | -0.212 | 9.082  | 0.086 | 0.328 |
| miR-548j-3p   | 0.504  | 0.393  | 0.087 | 0.332 |
| miR-29a-5p    | 0.275  | 0.831  | 0.091 | 0.345 |
| miR-551b-3p   | 0.337  | 1.815  | 0.092 | 0.345 |
| let-7g-5p     | 0.133  | 10.980 | 0.093 | 0.347 |
| miR-30e-3p    | 0.260  | 7.059  | 0.094 | 0.348 |
| miR-942-5p    | -0.162 | 4.976  | 0.097 | 0.356 |
| miR-423-5p    | -0.571 | 10.597 | 0.098 | 0.357 |
| miR-126-3p    | 0.141  | 14.192 | 0.100 | 0.357 |
| miR-26b-3p    | -0.152 | 3.623  | 0.100 | 0.357 |
| miR-370-3p    | -0.494 | 5.773  | 0.101 | 0.357 |
| miR-30b-3p    | 0.226  | 0.223  | 0.101 | 0.357 |
| miR-181b-5p   | -0.234 | 8.044  | 0.101 | 0.357 |
| miR-1908-5p   | -0.625 | 2.300  | 0.102 | 0.357 |
| miR-411-5p    | 0.408  | 5.491  | 0.102 | 0.357 |
| miR-376a-3p   | 0.498  | 6.560  | 0.104 | 0.357 |
| miR-424-3p    | -0.315 | 0.968  | 0.104 | 0.357 |
| miR-660-5p    | -0.229 | 5.628  | 0.104 | 0.357 |
| miR-19a-3p    | 0.330  | 5.810  | 0.105 | 0.357 |
| miR-126-5p    | 0.269  | 11.057 | 0.105 | 0.357 |
| miR-509-3p    | -0.548 | 2.288  | 0.106 | 0.357 |
| miR-26a-1-3p  | 0.161  | 2.985  | 0.107 | 0.357 |
| miR-760       | -0.534 | 1.310  | 0.108 | 0.357 |
| miR-152-3p    | 0.194  | 7.210  | 0.109 | 0.357 |
| miR-1233-3p   | 1.403  | -0.544 | 0.109 | 0.357 |
| miR-1185-2-3p | 0.452  | 0.123  | 0.109 | 0.357 |
| miR-30a-5p    | -0.208 | 6.368  | 0.110 | 0.357 |
| miR-376c-3p   | 0.501  | 5.292  | 0.110 | 0.357 |
| miR-30d-5p    | -0.119 | 11.785 | 0.111 | 0.357 |
| miR-106b-5p   | 0.368  | 4.658  | 0.112 | 0.357 |
| miR-16-5p     | -0.169 | 17.408 | 0.112 | 0.357 |
| miR-491-5p    | -0.207 | 3.945  | 0.112 | 0.357 |
| miR-487a-5p   | 0.397  | 0.384  | 0.113 | 0.359 |
| miR-548f-3p   | 0.497  | 5.197  | 0.115 | 0.361 |
| miR-9-5p      | 0.285  | 5.867  | 0.115 | 0.361 |
| miR-299-3p    | 0.512  | 0.096  | 0.116 | 0.361 |
| miR-500a-5p   | -0.358 | 3.026  | 0.117 | 0.361 |
| miR-548p      | 0.989  | 1.823  | 0.118 | 0.361 |
| miR-671-3p    | -0.345 | 3.284  | 0.118 | 0.361 |
| miR-3138      | -0.395 | 2.724  | 0.119 | 0.363 |
| miR-1307-3p   | -0.407 | 7.329  | 0.120 | 0.366 |
| miR-363-3p    | -0.265 | 6.300  | 0.122 | 0.367 |
| miR-377-3p    | 0.400  | 2.438  | 0.122 | 0.367 |
| miR-185-3p    | -0.256 | 4.607  | 0.123 | 0.368 |
| miR-320a      | -0.378 | 11.779 | 0.125 | 0.368 |
| miR-146b-3p   | -0.190 | 3.582  | 0.125 | 0.368 |
| miR-1233-5p   | -1.423 | -0.221 | 0.125 | 0.368 |
| miR-548e-3p   | 0.286  | 2.682  | 0.125 | 0.368 |
| miR-1273h-3p  | -0.305 | 7.277  | 0.127 | 0.370 |
| miR-99a-5p    | -0.266 | 4.162  | 0.132 | 0.380 |
| miR-1296-5p   | -0.156 | 2.226  | 0.132 | 0.380 |
| miR-21-5p     | 0.252  | 12.294 | 0.132 | 0.380 |
| miR-548a-5p   | 0.521  | 1.849  | 0.135 | 0.385 |
| miR-671-5p    | -0.294 | 4.210  | 0.139 | 0.395 |
| miR-548am-3p  | 1.402  | 2.613  | 0.140 | 0.396 |
| miR-20a-5p    | 0.186  | 9.087  | 0.141 | 0.397 |
| miR-500b-5p   | -0.369 | 2.709  | 0.142 | 0.398 |
| miR-3180-5p   | -0.890 | -0.295 | 0.144 | 0.401 |
| miR-190b      | -0.127 | 3.267  | 0.145 | 0.401 |
| miR-496       | 0.423  | 1.970  | 0.145 | 0.401 |
| miR-96-5p     | -0.469 | 3.856  | 0.146 | 0.401 |
| miR-3198      | -0.481 | 0.544  | 0.151 | 0.414 |
| miR-548ah-3p  | 1.009  | 2.757  | 0.152 | 0.414 |
| miR-454-5p    | -0.120 | 3.780  | 0.154 | 0.415 |
| miR-150-5p    | -0.416 | 10.272 | 0.155 | 0.415 |
| miR-23a-5p    | -0.375 | 1.003  | 0.155 | 0.415 |
| miR-98-5p     | 0.141  | 8.594  | 0.156 | 0.415 |
| miR-130b-3p   | 0.136  | 5.063  | 0.156 | 0.415 |
| miR-20a-3p    | 0.186  | 1.922  | 0.159 | 0.418 |
| miR-4732-5p   | -0.674 | 3.999  | 0.159 | 0.418 |
| miR-3605-3p   | -0.338 | 1.394  | 0.159 | 0.418 |
| miR-2110      | -0.396 | 3.338  | 0.161 | 0.420 |
| miR-144-3p    | -0.394 | 5.293  | 0.162 | 0.420 |
| miR-4448      | -0.343 | 4.223  | 0.162 | 0.420 |
| miR-454-3p    | 0.132  | 8.563  | 0.168 | 0.432 |
| miR-222-3p    | -0.152 | 8.603  | 0.169 | 0.432 |
| miR-6859-5p   | -0.327 | 3.735  | 0.170 | 0.432 |
| miR-1268b     | 0.974  | 0.512  | 0.170 | 0.432 |
| miR-7-5p      | 0.203  | 10.227 | 0.170 | 0.432 |

|               |        |        |       |       |
|---------------|--------|--------|-------|-------|
| miR-1294      | -0.324 | 1.946  | 0.171 | 0.433 |
| miR-1285-5p   | 0.731  | 8.438  | 0.174 | 0.438 |
| miR-483-5p    | -0.869 | 1.834  | 0.176 | 0.440 |
| miR-181a-5p   | -0.208 | 10.817 | 0.179 | 0.447 |
| miR-6513-5p   | 0.178  | 0.012  | 0.181 | 0.449 |
| miR-30d-3p    | 0.218  | 1.671  | 0.181 | 0.449 |
| miR-1255b-5p  | -0.338 | 7.593  | 0.187 | 0.459 |
| miR-548a-3p   | 0.272  | 5.676  | 0.187 | 0.459 |
| miR-5095      | 2.977  | 8.523  | 0.189 | 0.463 |
| miR-146b-5p   | 0.212  | 9.310  | 0.194 | 0.471 |
| miR-4645-3p   | 0.185  | 0.811  | 0.195 | 0.471 |
| miR-1972      | 3.618  | 5.510  | 0.196 | 0.471 |
| miR-155-5p    | 0.135  | 8.603  | 0.196 | 0.471 |
| miR-1270      | -0.368 | 3.003  | 0.198 | 0.472 |
| miR-103a-2-5p | 0.391  | -0.340 | 0.198 | 0.472 |
| miR-1306-5p   | -0.496 | 2.765  | 0.199 | 0.472 |
| miR-196a-5p   | -0.436 | 2.899  | 0.199 | 0.472 |
| miR-192-5p    | -0.197 | 7.507  | 0.200 | 0.472 |
| miR-134-5p    | 0.349  | 7.091  | 0.203 | 0.477 |
| miR-26a-2-3p  | 0.293  | -0.153 | 0.208 | 0.486 |
| miR-29b-2-5p  | 0.114  | 1.605  | 0.211 | 0.492 |
| miR-651-5p    | 0.255  | 1.314  | 0.214 | 0.497 |
| miR-1301-3p   | -0.252 | 5.720  | 0.220 | 0.507 |
| miR-330-3p    | 0.107  | 3.864  | 0.220 | 0.507 |
| miR-5010-5p   | -0.466 | 0.210  | 0.224 | 0.510 |
| miR-132-3p    | -0.139 | 3.504  | 0.224 | 0.510 |
| miR-4477b     | 0.403  | 0.399  | 0.224 | 0.510 |
| miR-136-3p    | 0.450  | 3.534  | 0.225 | 0.510 |
| miR-548ax     | 0.179  | 5.062  | 0.226 | 0.510 |
| miR-194-5p    | -0.230 | 7.337  | 0.229 | 0.510 |
| miR-122-5p    | -0.655 | 11.047 | 0.231 | 0.510 |
| miR-145-5p    | -0.245 | 6.318  | 0.231 | 0.510 |
| miR-24-3p     | -0.088 | 12.655 | 0.232 | 0.510 |
| miR-556-3p    | 0.258  | 1.254  | 0.232 | 0.510 |
| miR-182-5p    | -0.243 | 7.556  | 0.232 | 0.510 |
| miR-1292-5p   | -0.342 | 0.211  | 0.233 | 0.510 |
| miR-665       | -0.345 | 0.677  | 0.233 | 0.510 |
| miR-3173-5p   | -0.371 | 1.011  | 0.238 | 0.519 |
| miR-548as-5p  | 0.457  | 3.448  | 0.241 | 0.522 |
| miR-379-5p    | 0.269  | 7.187  | 0.241 | 0.522 |
| miR-1304-3p   | -0.927 | 3.254  | 0.248 | 0.533 |
| miR-3913-5p   | 0.168  | 2.448  | 0.248 | 0.533 |
| miR-885-5p    | -0.573 | 0.498  | 0.249 | 0.533 |
| miR-369-5p    | 0.247  | 5.217  | 0.254 | 0.540 |
| miR-376c-5p   | 0.470  | 1.518  | 0.256 | 0.540 |
| miR-432-5p    | -0.313 | 7.959  | 0.257 | 0.540 |
| miR-6842-3p   | -0.164 | 1.371  | 0.258 | 0.540 |
| miR-1290      | -0.501 | 4.532  | 0.258 | 0.540 |
| miR-17-3p     | 0.149  | 3.215  | 0.258 | 0.540 |
| miR-219a-5p   | 0.291  | 1.164  | 0.259 | 0.541 |
| miR-1250-5p   | 0.155  | 0.691  | 0.261 | 0.542 |
| miR-191-3p    | -0.122 | 3.805  | 0.261 | 0.542 |
| miR-382-5p    | 0.282  | 8.383  | 0.263 | 0.544 |
| miR-29b-1-5p  | -0.204 | 0.138  | 0.264 | 0.544 |
| miR-376b-5p   | 0.464  | 1.487  | 0.266 | 0.545 |
| miR-5583-3p   | 0.235  | 0.528  | 0.267 | 0.545 |
| miR-30b-5p    | 0.352  | 7.651  | 0.268 | 0.545 |
| miR-548k      | 0.150  | 1.443  | 0.268 | 0.545 |
| miR-1468-5p   | 0.150  | 0.552  | 0.274 | 0.555 |
| miR-548av-5p  | 0.146  | 1.444  | 0.282 | 0.568 |
| miR-548g-3p   | 1.256  | 1.192  | 0.286 | 0.574 |
| miR-1246      | -0.442 | 5.861  | 0.287 | 0.574 |
| miR-374b-5p   | 0.214  | 6.920  | 0.288 | 0.574 |
| miR-1255a     | 0.317  | 4.833  | 0.288 | 0.574 |
| miR-6500-3p   | 0.674  | -0.223 | 0.290 | 0.574 |
| miR-548x-3p   | 1.500  | 2.828  | 0.292 | 0.574 |
| miR-185-5p    | 0.085  | 9.811  | 0.292 | 0.574 |
| miR-548al     | 0.909  | -0.392 | 0.295 | 0.577 |
| miR-655-3p    | 0.417  | -0.112 | 0.295 | 0.577 |
| miR-30c-5p    | 0.166  | 11.296 | 0.298 | 0.581 |
| miR-627-5p    | -0.113 | 0.873  | 0.300 | 0.581 |
| miR-101-3p    | 0.168  | 11.459 | 0.302 | 0.581 |
| miR-664b-5p   | -0.242 | 1.474  | 0.304 | 0.581 |
| miR-3180      | -0.726 | 0.868  | 0.304 | 0.581 |
| miR-3180-3p   | -0.726 | 0.868  | 0.304 | 0.581 |
| miR-548c-3p   | -0.556 | 2.905  | 0.304 | 0.581 |
| miR-4742-3p   | -0.167 | 1.378  | 0.309 | 0.589 |
| miR-328-3p    | -0.238 | 5.945  | 0.311 | 0.592 |
| miR-664a-5p   | -0.176 | 5.295  | 0.313 | 0.592 |
| miR-379-3p    | 0.253  | 1.468  | 0.315 | 0.595 |
| miR-548ag     | 0.236  | 6.333  | 0.320 | 0.601 |
| miR-22-5p     | 0.146  | 3.999  | 0.320 | 0.601 |
| miR-503-5p    | -0.168 | 3.907  | 0.327 | 0.609 |
| miR-766-3p    | -0.140 | 5.380  | 0.327 | 0.609 |
| miR-1249      | -0.314 | 0.351  | 0.329 | 0.611 |
| miR-199a-5p   | 0.149  | 8.817  | 0.330 | 0.611 |
| miR-330-5p    | 0.075  | 3.616  | 0.337 | 0.622 |
| miR-1304-5p   | 0.967  | 0.167  | 0.338 | 0.622 |
| miR-548n      | 0.144  | 4.212  | 0.343 | 0.628 |
| miR-1306-3p   | -0.175 | 2.215  | 0.343 | 0.628 |
| miR-431-3p    | -0.232 | 0.193  | 0.346 | 0.631 |

|               |        |        |       |       |
|---------------|--------|--------|-------|-------|
| miR-30c-1-3p  | 0.093  | 2.582  | 0.350 | 0.637 |
| miR-483-3p    | -0.532 | 1.205  | 0.352 | 0.637 |
| miR-1271-3p   | 0.730  | -0.768 | 0.353 | 0.637 |
| miR-337-5p    | 0.237  | 3.963  | 0.359 | 0.644 |
| miR-7110-3p   | -0.303 | -0.067 | 0.360 | 0.644 |
| miR-301a-5p   | 0.192  | 1.602  | 0.361 | 0.644 |
| miR-1271-5p   | -0.127 | 1.919  | 0.362 | 0.644 |
| miR-151a-3p   | 0.074  | 12.424 | 0.362 | 0.644 |
| miR-1185-1-3p | 0.232  | 3.358  | 0.364 | 0.646 |
| miR-664a-3p   | 0.108  | 4.261  | 0.367 | 0.649 |
| miR-5009-5p   | -0.255 | 0.291  | 0.370 | 0.651 |
| miR-4286      | -0.116 | 10.665 | 0.370 | 0.651 |
| miR-181a-2-3p | 0.098  | 5.645  | 0.372 | 0.651 |
| miR-34a-5p    | 0.194  | 4.676  | 0.373 | 0.651 |
| miR-548o-3p   | -0.433 | 2.775  | 0.374 | 0.651 |
| miR-5096      | -0.744 | 11.722 | 0.375 | 0.651 |
| miR-10a-5p    | 0.103  | 7.108  | 0.376 | 0.651 |
| miR-6803-3p   | -0.300 | -0.112 | 0.379 | 0.655 |
| miR-3065-3p   | -0.161 | 0.404  | 0.384 | 0.661 |
| miR-195-5p    | 0.126  | 3.376  | 0.387 | 0.665 |
| miR-186-3p    | -0.123 | 0.571  | 0.395 | 0.674 |
| miR-181a-3p   | 0.160  | 4.944  | 0.395 | 0.674 |
| miR-409-3p    | 0.197  | 8.698  | 0.400 | 0.675 |
| miR-3200-3p   | -0.268 | 0.193  | 0.400 | 0.675 |
| miR-625-5p    | -0.164 | 6.770  | 0.402 | 0.675 |
| miR-326       | -0.129 | 6.590  | 0.403 | 0.675 |
| miR-342-3p    | -0.139 | 10.283 | 0.404 | 0.675 |
| miR-548an     | 0.340  | 1.688  | 0.404 | 0.675 |
| miR-758-3p    | 0.222  | 1.734  | 0.405 | 0.675 |
| miR-548t-5p   | 0.257  | 1.936  | 0.406 | 0.675 |
| miR-103a-3p   | 0.064  | 15.095 | 0.406 | 0.675 |
| miR-148b-5p   | 0.077  | 2.775  | 0.407 | 0.675 |
| miR-378d      | -0.451 | 0.023  | 0.410 | 0.678 |
| miR-1302      | 0.901  | 2.800  | 0.411 | 0.679 |
| miR-339-3p    | -0.086 | 5.037  | 0.414 | 0.679 |
| miR-190a-5p   | 0.144  | 5.571  | 0.415 | 0.679 |
| miR-135a-5p   | -0.243 | 1.965  | 0.417 | 0.679 |
| miR-29b-3p    | 0.211  | 9.739  | 0.417 | 0.679 |
| miR-3187-3p   | -0.198 | 0.369  | 0.418 | 0.679 |
| miR-744-5p    | -0.159 | 7.986  | 0.420 | 0.681 |
| miR-1185-5p   | 0.246  | 2.420  | 0.425 | 0.684 |
| miR-424-5p    | -0.195 | 3.748  | 0.425 | 0.684 |
| miR-494-3p    | 0.203  | 5.857  | 0.425 | 0.684 |
| miR-377-5p    | 0.198  | -0.095 | 0.427 | 0.685 |
| miR-409-5p    | 0.168  | 3.705  | 0.431 | 0.691 |
| miR-1179      | -0.107 | 1.832  | 0.433 | 0.692 |
| miR-16-2-3p   | -0.157 | 3.631  | 0.436 | 0.694 |
| miR-299-5p    | 0.181  | 2.468  | 0.437 | 0.694 |
| miR-6513-3p   | 0.070  | 1.835  | 0.441 | 0.696 |
| miR-335-3p    | -0.137 | 5.333  | 0.443 | 0.696 |
| miR-215-5p    | -0.157 | 2.194  | 0.444 | 0.696 |
| miR-127-5p    | 0.187  | 1.654  | 0.445 | 0.696 |
| miR-2277-5p   | -0.095 | 0.413  | 0.445 | 0.696 |
| miR-339-5p    | -0.093 | 11.621 | 0.446 | 0.696 |
| miR-664b-3p   | 0.111  | 2.162  | 0.453 | 0.705 |
| miR-574-5p    | -0.605 | 14.568 | 0.454 | 0.705 |
| miR-548ak     | 0.655  | 2.923  | 0.456 | 0.705 |
| miR-378g      | -0.219 | 0.027  | 0.456 | 0.705 |
| miR-4326      | -0.312 | 1.874  | 0.459 | 0.708 |
| miR-23c       | -0.091 | 0.292  | 0.469 | 0.722 |
| miR-125b-5p   | -0.109 | 8.080  | 0.472 | 0.723 |
| miR-181b-3p   | 0.238  | 0.083  | 0.473 | 0.723 |
| miR-4435      | -0.183 | 1.570  | 0.475 | 0.725 |
| miR-6734-5p   | -0.182 | 0.555  | 0.479 | 0.729 |
| miR-6516-5p   | 0.110  | 1.586  | 0.481 | 0.731 |
| miR-144-5p    | -0.214 | 7.018  | 0.489 | 0.740 |
| miR-27a-3p    | 0.154  | 9.739  | 0.491 | 0.740 |
| miR-323b-3p   | 0.158  | 4.932  | 0.491 | 0.740 |
| miR-1285-3p   | -0.115 | 8.508  | 0.494 | 0.743 |
| miR-199b-5p   | -0.212 | 4.252  | 0.500 | 0.748 |
| miR-27a-5p    | 0.160  | 2.220  | 0.500 | 0.748 |
| miR-20b-5p    | -0.094 | 5.620  | 0.504 | 0.752 |
| miR-143-5p    | 0.171  | 1.979  | 0.506 | 0.752 |
| miR-504-5p    | 0.133  | 0.213  | 0.508 | 0.754 |
| miR-5187-5p   | -0.146 | 2.108  | 0.514 | 0.761 |
| miR-598-3p    | 0.143  | 4.565  | 0.518 | 0.764 |
| miR-1307-5p   | 0.080  | 5.708  | 0.523 | 0.770 |
| miR-542-3p    | 0.169  | 2.341  | 0.531 | 0.780 |
| miR-548ap-5p  | 0.079  | 9.773  | 0.536 | 0.785 |
| miR-3617-5p   | 0.136  | 0.442  | 0.538 | 0.785 |
| miR-766-5p    | 0.084  | 2.287  | 0.539 | 0.785 |
| miR-154-5p    | 0.196  | 3.881  | 0.539 | 0.785 |
| miR-27b-3p    | 0.088  | 10.051 | 0.543 | 0.788 |
| miR-654-3p    | 0.143  | 7.125  | 0.547 | 0.790 |
| miR-139-3p    | -0.182 | 4.524  | 0.548 | 0.790 |
| miR-27b-5p    | -0.088 | 1.148  | 0.550 | 0.790 |
| miR-29c-3p    | 0.155  | 8.568  | 0.550 | 0.790 |
| miR-548b-5p   | 0.127  | 7.793  | 0.552 | 0.790 |
| miR-548az-5p  | 0.256  | 5.839  | 0.553 | 0.790 |
| miR-23b-3p    | 0.054  | 9.599  | 0.557 | 0.792 |
| miR-324-5p    | 0.055  | 5.454  | 0.559 | 0.792 |

|              |        |        |       |       |
|--------------|--------|--------|-------|-------|
| miR-22-3p    | -0.045 | 8.495  | 0.559 | 0.792 |
| miR-3194-3p  | 0.272  | 0.002  | 0.560 | 0.792 |
| miR-4446-3p  | 0.125  | 3.069  | 0.563 | 0.795 |
| miR-142-5p   | 0.109  | 10.854 | 0.567 | 0.797 |
| miR-136-5p   | 0.160  | 2.770  | 0.568 | 0.797 |
| let-7c-5p    | -0.079 | 9.528  | 0.568 | 0.797 |
| miR-143-3p   | 0.144  | 9.208  | 0.571 | 0.797 |
| miR-28-3p    | -0.054 | 10.686 | 0.571 | 0.797 |
| miR-4659b-3p | 0.080  | 0.948  | 0.573 | 0.798 |
| miR-30a-3p   | 0.058  | 3.079  | 0.575 | 0.798 |
| miR-548l     | -0.098 | 1.877  | 0.575 | 0.798 |
| miR-1299     | -0.475 | 4.630  | 0.577 | 0.798 |
| miR-584-5p   | -0.085 | 9.252  | 0.579 | 0.798 |
| miR-23a-3p   | -0.051 | 11.962 | 0.581 | 0.798 |
| miR-493-3p   | 0.126  | 5.508  | 0.581 | 0.798 |
| let-7a-5p    | -0.082 | 17.835 | 0.585 | 0.802 |
| miR-1273c    | -0.103 | 1.024  | 0.588 | 0.802 |
| miR-1260b    | -0.086 | 3.783  | 0.589 | 0.802 |
| miR-5193     | 0.087  | 1.173  | 0.589 | 0.802 |
| miR-29c-5p   | -0.049 | 4.579  | 0.594 | 0.806 |
| miR-3133     | -0.394 | -0.564 | 0.596 | 0.806 |
| miR-505-5p   | -0.109 | 3.558  | 0.597 | 0.806 |
| miR-485-3p   | 0.180  | 5.831  | 0.601 | 0.810 |
| miR-7849-3p  | 0.085  | 0.247  | 0.609 | 0.819 |
| miR-5585-3p  | -0.858 | 6.719  | 0.618 | 0.830 |
| miR-7851-3p  | -0.161 | 3.495  | 0.627 | 0.835 |
| miR-548ae    | 0.791  | 3.953  | 0.627 | 0.835 |
| miR-7-1-3p   | 0.084  | 2.452  | 0.627 | 0.835 |
| miR-548j-5p  | 0.063  | 9.735  | 0.628 | 0.835 |
| miR-4662a-5p | 0.091  | 1.907  | 0.632 | 0.837 |
| miR-429      | -0.075 | 0.270  | 0.632 | 0.837 |
| let-7g-3p    | 0.112  | 0.220  | 0.638 | 0.842 |
| miR-338-3p   | -0.082 | 5.028  | 0.641 | 0.844 |
| miR-19b-1-5p | 0.061  | 0.495  | 0.645 | 0.846 |
| miR-221-5p   | 0.044  | 5.310  | 0.645 | 0.846 |
| miR-544a     | 0.230  | 0.669  | 0.646 | 0.846 |
| miR-543      | 0.096  | 3.379  | 0.648 | 0.846 |
| miR-431-5p   | -0.101 | 7.576  | 0.650 | 0.847 |
| miR-378c     | -0.065 | 5.108  | 0.655 | 0.852 |
| miR-493-5p   | 0.103  | 5.498  | 0.660 | 0.855 |
| miR-5584-5p  | 0.087  | 0.672  | 0.662 | 0.855 |
| let-7f-1-3p  | -0.111 | 0.491  | 0.663 | 0.855 |
| miR-329-5p   | -0.118 | 2.442  | 0.663 | 0.855 |
| miR-146a-3p  | 0.456  | 2.291  | 0.669 | 0.860 |
| let-7d-5p    | -0.054 | 10.427 | 0.672 | 0.862 |
| miR-548q     | -0.092 | 4.336  | 0.677 | 0.867 |
| miR-191-5p   | -0.037 | 12.565 | 0.681 | 0.870 |
| miR-107      | -0.037 | 10.028 | 0.682 | 0.870 |
| miR-4301     | -0.249 | 2.532  | 0.685 | 0.872 |
| miR-873-5p   | 0.149  | 1.352  | 0.692 | 0.878 |
| miR-1268a    | 0.398  | 3.542  | 0.698 | 0.884 |
| miR-337-3p   | 0.121  | 2.407  | 0.706 | 0.892 |
| miR-329-3p   | -0.081 | 5.645  | 0.711 | 0.896 |
| miR-1273g-3p | -0.663 | 11.153 | 0.712 | 0.896 |
| miR-548w     | 0.143  | 5.896  | 0.716 | 0.897 |
| miR-3620-5p  | -0.312 | 3.024  | 0.717 | 0.897 |
| miR-127-3p   | -0.079 | 7.007  | 0.717 | 0.897 |
| miR-548at-5p | 0.101  | 4.401  | 0.719 | 0.897 |
| miR-452-5p   | -0.092 | 2.671  | 0.721 | 0.897 |
| miR-381-3p   | 0.081  | 5.537  | 0.725 | 0.898 |
| miR-378f     | -0.058 | 1.820  | 0.726 | 0.898 |
| miR-128-3p   | 0.031  | 10.346 | 0.727 | 0.898 |
| miR-125a-5p  | -0.079 | 9.141  | 0.727 | 0.898 |
| miR-1226-3p  | -0.076 | 1.073  | 0.735 | 0.903 |
| miR-584-3p   | 0.064  | 0.426  | 0.735 | 0.903 |
| miR-548av-3p | 0.152  | 3.903  | 0.736 | 0.903 |
| miR-3179     | 0.136  | -0.272 | 0.739 | 0.904 |
| miR-548y     | 0.353  | -0.318 | 0.742 | 0.904 |
| miR-548f-5p  | -0.235 | 0.762  | 0.742 | 0.904 |
| miR-98-3p    | 0.084  | 0.779  | 0.744 | 0.904 |
| miR-3143     | -0.055 | -0.186 | 0.745 | 0.904 |
| miR-3140-3p  | -0.055 | 0.699  | 0.746 | 0.904 |
| miR-3960     | -0.260 | 3.467  | 0.752 | 0.907 |
| miR-487b-5p  | -0.078 | 0.849  | 0.754 | 0.907 |
| miR-495-5p   | -0.079 | -0.270 | 0.755 | 0.907 |
| miR-145-3p   | -0.065 | 1.763  | 0.755 | 0.907 |
| miR-15b-3p   | -0.056 | 5.648  | 0.765 | 0.918 |
| miR-548i     | -0.182 | 3.203  | 0.776 | 0.927 |
| miR-485-5p   | -0.093 | 3.492  | 0.776 | 0.927 |
| miR-4659a-3p | -0.054 | 0.124  | 0.780 | 0.929 |
| miR-140-5p   | 0.034  | 6.331  | 0.782 | 0.929 |
| miR-15b-5p   | 0.043  | 9.487  | 0.783 | 0.929 |
| miR-582-3p   | -0.088 | 1.716  | 0.784 | 0.929 |
| miR-3161     | -0.240 | -0.951 | 0.786 | 0.929 |
| miR-1273h-5p | -0.060 | 11.451 | 0.788 | 0.929 |
| miR-505-3p   | -0.022 | 4.359  | 0.789 | 0.929 |
| miR-181d-5p  | -0.035 | 3.947  | 0.792 | 0.930 |
| miR-877-3p   | 0.105  | 2.150  | 0.793 | 0.930 |
| miR-323a-3p  | -0.055 | 4.078  | 0.794 | 0.930 |
| miR-6511b-5p | -0.173 | 1.158  | 0.798 | 0.932 |
| miR-200b-3p  | -0.033 | 2.188  | 0.799 | 0.932 |

|              |        |        |       |       |
|--------------|--------|--------|-------|-------|
| miR-141-3p   | 0.044  | 3.127  | 0.802 | 0.933 |
| miR-708-5p   | 0.161  | 2.615  | 0.807 | 0.937 |
| miR-19b-3p   | 0.060  | 10.256 | 0.809 | 0.938 |
| miR-18b-5p   | 0.043  | 2.410  | 0.812 | 0.940 |
| miR-6772-3p  | 0.055  | 0.690  | 0.816 | 0.941 |
| miR-877-5p   | 0.024  | 2.378  | 0.817 | 0.941 |
| let-7a-3p    | -0.058 | 4.497  | 0.823 | 0.946 |
| miR-31-5p    | 0.085  | 2.641  | 0.826 | 0.947 |
| miR-548aq-5p | 0.187  | 2.543  | 0.827 | 0.947 |
| miR-5189-3p  | -0.093 | 0.435  | 0.831 | 0.947 |
| miR-548ai    | 0.194  | 0.527  | 0.832 | 0.947 |
| miR-570-5p   | 0.194  | 0.527  | 0.832 | 0.947 |
| miR-450b-5p  | -0.053 | 2.048  | 0.834 | 0.947 |
| miR-487b-3p  | 0.048  | 5.402  | 0.835 | 0.947 |
| miR-548ap-3p | -0.072 | 10.374 | 0.837 | 0.947 |
| miR-1        | 0.078  | 8.318  | 0.838 | 0.947 |
| miR-1229-3p  | 0.048  | 0.765  | 0.840 | 0.948 |
| miR-6770-3p  | -0.062 | 0.142  | 0.844 | 0.950 |
| miR-3064-5p  | 0.024  | 0.924  | 0.846 | 0.951 |
| miR-186-5p   | -0.024 | 8.853  | 0.848 | 0.951 |
| miR-582-5p   | 0.068  | 0.885  | 0.853 | 0.954 |
| miR-3065-5p  | -0.030 | 2.573  | 0.854 | 0.954 |
| miR-200a-3p  | 0.023  | 2.514  | 0.855 | 0.954 |
| miR-652-3p   | 0.018  | 7.109  | 0.857 | 0.954 |
| miR-181c-5p  | 0.031  | 3.046  | 0.866 | 0.962 |
| miR-548ar-5p | 0.098  | 7.739  | 0.868 | 0.962 |
| miR-6741-3p  | 0.046  | 0.231  | 0.875 | 0.962 |
| miR-628-3p   | -0.019 | 5.661  | 0.877 | 0.962 |
| miR-548d-5p  | 0.025  | 12.885 | 0.878 | 0.962 |
| miR-4454     | 0.037  | 9.159  | 0.881 | 0.962 |
| miR-576-3p   | 0.017  | 5.501  | 0.882 | 0.962 |
| miR-433-3p   | 0.038  | 1.880  | 0.885 | 0.962 |
| miR-148a-3p  | 0.020  | 10.002 | 0.889 | 0.962 |
| miR-574-3p   | -0.018 | 5.403  | 0.890 | 0.962 |
| miR-29a-3p   | 0.041  | 9.472  | 0.894 | 0.962 |
| miR-4433b-5p | -0.036 | 7.929  | 0.895 | 0.962 |
| miR-6511a-5p | -0.091 | 1.038  | 0.895 | 0.962 |
| miR-3074-5p  | -0.035 | 1.854  | 0.897 | 0.962 |
| miR-6511b-3p | -0.023 | 2.078  | 0.898 | 0.962 |
| miR-497-5p   | -0.022 | 1.523  | 0.900 | 0.962 |
| miR-548aa    | 0.043  | 10.786 | 0.900 | 0.962 |
| miR-548t-3p  | 0.043  | 10.786 | 0.900 | 0.962 |
| let-7i-3p    | -0.024 | 2.370  | 0.901 | 0.962 |
| miR-450a-5p  | -0.040 | 0.853  | 0.901 | 0.962 |
| miR-619-5p   | -0.136 | 11.202 | 0.902 | 0.962 |
| miR-874-3p   | -0.015 | 1.960  | 0.903 | 0.962 |
| miR-342-5p   | 0.021  | 3.944  | 0.903 | 0.962 |
| miR-548aj-5p | 0.066  | 7.504  | 0.907 | 0.962 |
| miR-548g-5p  | 0.066  | 7.504  | 0.907 | 0.962 |
| miR-548x-5p  | 0.066  | 7.504  | 0.907 | 0.962 |
| miR-624-5p   | -0.031 | 0.116  | 0.908 | 0.962 |
| miR-2355-3p  | -0.012 | 3.959  | 0.913 | 0.965 |
| miR-4433b-3p | 0.037  | 2.351  | 0.914 | 0.965 |
| miR-2355-5p  | 0.025  | 0.457  | 0.916 | 0.965 |
| miR-210-3p   | -0.013 | 2.393  | 0.918 | 0.965 |
| miR-99b-3p   | -0.021 | 2.773  | 0.922 | 0.968 |
| miR-3688-3p  | -0.018 | 1.689  | 0.926 | 0.971 |
| let-7i-5p    | -0.008 | 13.259 | 0.930 | 0.973 |
| miR-4507     | -0.108 | 1.601  | 0.938 | 0.978 |
| miR-744-3p   | 0.023  | -0.457 | 0.938 | 0.978 |
| miR-548ay-5p | 0.012  | 13.403 | 0.942 | 0.979 |
| miR-99b-5p   | -0.014 | 7.865  | 0.943 | 0.979 |
| miR-15a-5p   | -0.011 | 9.211  | 0.944 | 0.979 |
| miR-132-5p   | 0.009  | 0.644  | 0.945 | 0.979 |
| miR-1287-5p  | 0.008  | 3.050  | 0.950 | 0.980 |
| miR-221-3p   | 0.006  | 11.513 | 0.950 | 0.980 |
| miR-376a-5p  | -0.019 | 0.104  | 0.955 | 0.983 |
| miR-548e-5p  | -0.015 | 1.838  | 0.958 | 0.985 |
| miR-95-3p    | 0.011  | 2.108  | 0.963 | 0.988 |
| miR-21-3p    | 0.009  | 3.394  | 0.967 | 0.991 |
| miR-589-3p   | -0.004 | 1.137  | 0.971 | 0.992 |
| miR-4772-3p  | 0.013  | 1.699  | 0.971 | 0.992 |
| miR-30e-5p   | 0.003  | 10.655 | 0.974 | 0.993 |
| miR-138-5p   | -0.007 | 0.000  | 0.980 | 0.993 |
| let-7e-5p    | 0.005  | 9.484  | 0.980 | 0.993 |
| miR-548h-3p  | 0.009  | 8.937  | 0.983 | 0.993 |
| miR-548z     | 0.009  | 8.937  | 0.983 | 0.993 |
| miR-1273d    | -0.027 | 4.498  | 0.983 | 0.993 |
| miR-181c-3p  | 0.002  | 3.538  | 0.987 | 0.994 |
| miR-130b-5p  | -0.002 | 5.414  | 0.987 | 0.994 |
| miR-421      | -0.001 | 5.199  | 0.991 | 0.995 |
| miR-6859-3p  | -0.005 | 0.719  | 0.992 | 0.995 |
| miR-6511a-3p | -0.001 | 4.865  | 0.993 | 0.995 |
| let-7f-2-3p  | -0.001 | 0.250  | 0.998 | 0.998 |



## Table A3. List of the putative target genes

Table A3. List of the putative target genes for each miRNA from our signature (miR-34a-5p, miR-345-5p, miR-200c-3p, miR-10a-3p), as indicated by DIANA-miRPath v.3 using TarBase (experimentally supported approach).

| miR-34a-5p    |             |              |               |                   |            |               |                |                    |
|---------------|-------------|--------------|---------------|-------------------|------------|---------------|----------------|--------------------|
| ARHGAP1       | TMEM33      | HUWE1        | HNRNPU        | KIAA1897(hsa)     | MMP9       | SLC36A1       | KIAA0899(hsa)  | PCYOX1             |
| BMI1          | POLI        | MAP4         | TAB2          | MOCS2             | MRPS2      | RDRC(hsa)     | SLC30A3        | SCML2              |
| TMSB10        | LRSAM1      | ETFDH        | ANO9          | RAD2(hsa)         | PTGER2     | A2RP(hsa)     | LRRC46         | RAD17              |
| KDRF(hsa)     | ZNF76       | FRS2         | FXN           | ZFPL1             | LZTFL1     | PRSS1         | SGPP1          | IL6                |
| RGP1          | SLC37A3     | BIN1         | TCF19         | MED16             | ABCD1      | STAR          | HDAC8          | CMPK(hsa)          |
| TGDS          | REEP6       | TRIM7        | SAPL(hsa)     | GDA               | POLR1B     | KIF11         | FAM111A        | PPF1A1             |
| NA            | MTERFD2     | LMNTD2       | APOO          | NCEH1             | AF131216.5 | ELMOD1        | ATP1A1         | RNF141             |
| CDC46(hsa)    | VPS37D      | KLHL17       | PPP1R18       | TPM4              | BCL7B      | CITED2        | KIAA0004(hsa)  | OK/SW-cl.29(hsa)   |
| ALR(hsa)      | H2AFM(hsa)  | AP5Z1        | COQ9          | BRCA1             | DIAPH1     | NLGN2         | H4/K(hsa)      | TRIB1              |
| GOLPH3L       | D3S48E(hsa) | SPTB2(hsa)   | C17orf99      | AGBL5             | CHST6      | KDELRL1       | SNF8           | CTSH               |
| VPS4A         | ETV6        | CAPZA2       | PNPLA8        | THEM4             | MLST8      | NUDT22        | ST20           | hCG_2005629(hsa)   |
| NOTUM         | ADCY7       | DPYSL4       | H4FI(hsa)     | GOLGA7            | PTP4A2     | NPIP4         | NUCKS(hsa)     | H1F4(hsa)          |
| ZDHHC18       | BCAT2       | GOLGA8B      | GLI4          | GPC3              | FGD3       | P1725(hsa)    | CNOT6L         | MAPK1              |
| RTN4          | MMGT1       | KLF12        | UBE2I         | LAD1              | COG5       | SURF4         | TACSTD2        | ADTB2(hsa)         |
| SEMA3G        | LIMD2       | UTS2         | MAGED1        | LYPD8             | PPP1R14C   | N4BP4(hsa)    | AS3MT          | CLTB               |
| C17orf85      | FGFR3       | MRPS12       | SLC16A4       | FAF2              | CHERP      | PSMD9         | SNX5           | IMP3               |
| ARPC5         | H2AFC(hsa)  | RAD54B       | VEPH1         | GGA3              | TK1        | MPI           | EHD1           | AMER1              |
| ERLIN1        | STX5        | DMBT1        | GXYLT1        | LPCAT4            | ZDHHC4     | WIPF3         | KNSL1(hsa)     | FNDC3A             |
| EPB41L4A      | H2AFX       | STXBP5       | C6orf141      | MCM2              | RNASEK     | ANX4(hsa)     | FLOT2          | SDCBP              |
| NEK3          | LTN1        | KIF2A        | WIZ           | 452K12.5-012(hsa) | ORMDL2     | SKA1          | SLC2A12        | SLAIN2             |
| COPS7A        | FAM86C1     | TPCN2        | SNX15         | EHBP1             | MECP2      | RAD1          | CLSTN1         | PLOD1              |
| PPP1CA        | ARF5        | H2AFG(hsa)   | EZH2          | SMG6              | MAPRE3     | PPP6R2        | SSBP3          | PAX9               |
| E2F7          | C19orf66    | TIAF1        | CDK6          | SYNC              | ZFP36L1    | WBSCR20(hsa)  | USP3           | ANO7               |
| TRIB3         | LPHN2       | LOXL2        | HRG           | POU6F1            | ARV1       | KIAA1914(hsa) | CHKA           | KANK3              |
| DHRS4-AS1     | PTPRN2      | SPDEF        | SORBS1        | NUP214            | H3FB(hsa)  | PUS7          | RSBN1          | LRRC41             |
| H3FI(hsa)     | SLC25A15    | GTF3C1       | USP30         | ANK3              | CORIN      | ST7           | KCNK6          | SUCLG1             |
| TMSA(hsa)     | REPS1       | BTBD19       | RHEB          | CROT              | PDGFRL     | SHARPIN       | PICH(hsa)      | RNF168             |
| SLC44A2       | C16orf58    | GDF15        | TFAP2A        | PSD3              | ARID1A     | HNGS1(hsa)    | ITPR3          | TLN1               |
| SLC2A14       | KCNE3       | CLAPM1(hsa)  | ACAA2         | LARP1             | UBA1       | PYGO2         | KIAA0731(hsa)  | PRO1777(hsa)       |
| FBXO5         | SCAF4       | PLEKHH3      | DCAF10        | C15orf65          | PANK2      | PLXNB1        | MPP2           | C1QL1              |
| SYNGR4        | IP6K1       | TBC1D17      | SPTAN1        | FH                | STRAP      | SLC12A9       | SERF1A         | RAD51AP1           |
| PFN1          | CRKL        | LTBP2        | VPS37B        | HRIHFB2091(hsa)   | FAM49B     | EEF1G         | TRIM21         | HIST1H2AC          |
| SCLT1         | HIST1H1C    | H2BFQ(hsa)   | SLC25A29      | RSRC1             | CCDC82     | IGF2BP3       | FAM198A        | KNSTRN             |
| KIAA0765(hsa) | PTPN23      | DRAM1        | ZDHHC19       | PRDX4             | PRDX1      | G3(hsa)       | VWA1           | DYRK1B             |
| KRT32         | ATXN2L      | CDC48        | SP1507(hsa)   | MLLT1             | TMEM86B    | NFRKB         | ZNF573         | ERCC6L             |
| RNF114        | AK4         | MCM4         | FOXN2         | STK17B            | SLC7A8     | ELAVL1        | H4FG(hsa)      | RRAGC              |
| C12orf73      | NAT8L       | AC013268.5.1 | FYN           | HNRNPUL2          | FAM126A    | FAM178B       | PXT1           | UACA               |
| RBM14         | C6orf136    | HIST2H3D     | TMEM104       | NCAM2             | CCDC116    | PHKA1         | EMILIN2        | TRIT1              |
| NSL1          | HP1BP3      | RBM23        | NQO1          | ITFG2             | F8         | ZBTB21        | ZER1           | C22orf29           |
| SLC25A44      | HN1         | SLC26A1      | UREB1(hsa)    | ZNF697            | AP2A2      | SNCG          | ALDH9A1        | TMPRSS4            |
| NA            | GPRC5C      | KNS1(hsa)    | KIAA1307(hsa) | LYPD6             | BEND4      | CCDC88A       | EFTUD1         | L3MBTL3            |
| HSPA13        | WHSC1L1     | SETD3        | HACE1         | RNASEH1           | SMARCA1    | CDC20         | CTTNBP2NL      | NFATC1             |
| FCHO1         | ANKRD13D    | NTN1         | PDIA6         | DMWD              | DOK7       | EMP2          | H4FC(hsa)      | RNASEH2B           |
| KLHL28        | ARHGAP33    | DNAJC10      | PUS10         | TRIM59            | MYPOP      | AP2A1         | APOL2          | DKFZp686N2176(hsa) |
| NDUFC1        | UVSSA       | ORMDL3       | IGF2BP1       | GNPI(hsa)         | KXD1       | CCDC50        | hCG_17321(hsa) | FGF7               |

|                            |               |               |           |               |                  |                          |                |                  |
|----------------------------|---------------|---------------|-----------|---------------|------------------|--------------------------|----------------|------------------|
| OAZ3                       | CNOT4         | AREG          | MDH2      | H4/N(hsa)     | MYL9             | RP5-824I19__A.1-002(hsa) | hCG_33495(hsa) | RFC3             |
| FAM155B                    | STK4          | C7orf50       | BCAS4     | PGM2L1        | CENPO            | ARSG                     | UBR7           | PRO0992(hsa)     |
| RNF11                      | ARTN          | GOT1          | RSRP1     | CCAR1         | CTBS             | DKFZp686L08115(hsa)      | TPP1           | TMPPE            |
| BRAF                       | VTA1          | LACS2(hsa)    | USP54     | WDHD1         | MTPN             | PPP1R12C                 | ACSM3          | SPT5(hsa)        |
| FHL2                       | DNASE1L1      | FAM69A        | SLC35A4   | CENPK         | STX17            | PM227(hsa)               | ZHX2           | FHIT             |
| HGSNAT                     | RP11-835E18.2 | STK11         | SNAPC2    | MAL2          | SOCS5            | CALD1                    | ZO2(hsa)       | RPL27A           |
| POU2F1                     | MAP2K2        | PAPOLG        | S100A11   | DDX24         | TFRC             | ADNP                     | RLF            | AIP              |
| SFT2D1                     | c-met(hsa)    | PPP3R1        | WDR62     | CSRP1         | CABLES1          | LCLAT1                   | FUT10          | RANBP9           |
| UBASH3B                    | SLC25A46      | RDX           | TGFB1     | EBF3          | PFDN1            | NF1                      | SEC22C         | DHCR7            |
| FASN                       | RASA2         | IFT122        | SERINC1   | GSN           | VIM              | PI2(hsa)                 | IGSF3          | SYNGR1           |
| CDH26                      | PPP2R3A       | HIST1H4C      | LIPT1     | DMD           | DSN1             | JPH1                     | XPO4           | DIAPH2           |
| CDC6                       | ZNF775        | HERC6         | ZNF789    | CRTC2         | BMP2K            | TMEM219                  | ZNRF2          | HIST1H2AB        |
| HIST1H1A                   | MAP7D3        | TOB1          | DNAJC9    | CSEIL         | ABHD4            | NAA11                    | WBSCR20A(hsa)  | SERPINE1         |
| ACTB                       | RBM45         | ZFP36         | NDFIP1    | CNIH1         | RNF34            | IGBP1                    | SLC29A4        | HMMR             |
| 1144G6.4-006(hsa)          | POLDIP2       | INPP5F        | MARK3     | KANSL1        | CNRIP1           | ERCC4                    | ZNF311         | ZNF33A           |
| BLZF1                      | UFC1          | ADAT2         | RPIA      | KIAA0010(hsa) | CXCL11           | SERPINB1                 | ZNF585A        | NKIRAS2          |
| DCLRE1A                    | REXO1         | SYNJ2BP       | CASP2     | RNF145        | MAPKAPK3         | FZD1                     | QDPR           | VPS35            |
| EAF1                       | PIGX          | CRYA1(hsa)    | GDIL(hsa) | POP7          | TMED10           | KDSR                     | KIAA0922       | SCARB2           |
| ACAS2L(hsa)                | FEN1          | XB130(hsa)    | BLOC1S3   | USP2          | STIL             | STK25                    | DHX9           | FAM73B           |
| TTC7B                      | SNP70(hsa)    | KRT15         | CREB3     | KBTBD4        | FOXA1            | MYT1                     | CPLX1          | GAS1             |
| SNAP23                     | COA1          | WAC           | SHMT2     | TSKU          | CBLC             | FAM45A                   | ANKRD28        | KIF4(hsa)        |
| DUSP4                      | MORC2         | MIEN1         | GBF1      | CERS2         | WDR73            | CDM(hsa)                 | PCYOX1L        | AGTRAP           |
| PHLPP2                     | FYCO1         | IQGAP1        | COX16     | ANP32A        | DLL1             | MED28                    | TCEA2          | PLAU             |
| MTO1                       | CDC8(hsa)     | UBTD1         | ZNF189    | MAP3K14       | HIST1H3C         | UBAP2                    | DERL1          | ASB9             |
| PRLR                       | BID           | NRBP2         | ZC3H3     | SYNGR2        | SNCA             | EMR2                     | LMNA           | SMYD5            |
| MPHOSPH8                   | CLIC4         | GAN           | CORO1C    | SLC9A1        | HRIHFB2157(hsa)  | ZNF398                   | NDC1           | CIRBP            |
| FOXJ2                      | BTRC          | PSME1         | RDH5      | SP4           | KPNA1            | TMEM106C                 | SLC7A2         | A2D(hsa)         |
| BSCL2                      | NPRL3         | TRIP11        | MAP3K11   | CDH1          | RCN(hsa)         | PQLC3                    | CANT1          | CDK16            |
| C15orf13(hsa)              | C1orf74       | ARHGAP32      | MCM7      | PARP6         | CORO1B           | YAF2                     | AUH            | MTFR2            |
| DDAH2                      | PRR3          | ASXL1         | HIP1R     | RAB11FIP2     | SLC25A39         | RNASEH2C                 | CCDC74A        | LPCAT3           |
| LIG1                       | CYR61         | WNK1          | FBL       | LHPP          | PIM1             | DTNA                     | TULP4          | CYBRD1           |
| HLN(hsa)                   | CHD1          | MNT           | TCP1      | CENPA         | TPA1(hsa)        | SLCO4A1                  | FN1            | MGAT4A           |
| ZSCAN5A                    | FAM195B       | RUFY3         | AP1M1     | PITPNM3       | IL17RB           | ABCC3                    | ACSL1          | CYB5R3           |
| SEC16A                     | HIST1H2AE     | PEX16         | FKBP1A    | TGFB1I1       | SRPR             | PTK6                     | ARHGEF9        | SCN1B            |
| MSAP(hsa)                  | SIRT6         | NRTN          | CHD4      | C9orf72       | ZNF692           | HIBADH                   | AMACR          | CCNG2            |
| PPP1R37                    | LYRM5         | GSE1          | CXCL2     | CHKB          | KIAA1462         | GTF2IRD2                 | IFFO1          | HELLS            |
| RAB3GAP1                   | ACER3         | FTSJ1         | DENND1A   | RNF106(hsa)   | CALML4           | YY1                      | SEPT2          | SNX17            |
| H3FJ(hsa)                  | TMEM39A       | GPATCH2       | SMARCD1   | ZC4H2         | PRRT1            | KIAA1228(hsa)            | UBN2           | ABTB2            |
| ACKR3                      | HIST2H4(hsa)  | PMF1          | ARHGDI1   | LIME1         | ARNTL2           | DAMA-236L13.16-003(hsa)  | H4F2(hsa)      | GTSE1            |
| ZEB2                       | RCAN1         | CDC5L         | C11orf57  | FECH          | ZC3H12C          | HSD11B2                  | IPO8           | BTG1             |
| MLK4                       | ATE1          | VPS29         | MBD1      | PITPNM2       | COL1A1           | C10orf88                 | GATAD2B        | C11orf80         |
| UNRIP(hsa)                 | FAIM3         | PBX1          | SIRPA     | SMC4          | DNM1             | CDC21(hsa)               | SGTA           | PIDD1            |
| AFAP1L2                    | CCNL2         | C16orf46      | TYRO3     | SLC30A8       | PRKACA           | KIAA1491(hsa)            | ANXA11         | SPIRE2           |
| KIAA0164(hsa)              | NTE(hsa)      | EXD2          | ZNF707    | SFXN1         | ZNF496           | ARID5B                   | SPTA2(hsa)     | ITSN1            |
| STAG3L3                    | CCNA2         | CRTC1         | PPIA      | MYH14         | VCP              | B4GALT3                  | SNAI3          | USP22            |
| NETO2                      | HIST3H3       | NBR1          | MTMR12    | RAP1GAP       | DNAJC15          | TESK1                    | EPS15L1        | A2LG(hsa)        |
| TROAP                      | CLEC2D        | RPL37         | ZNF304    | UBL7          | MEI              | DUSP7                    | RRP12          | SIX2             |
| TCF3                       | FBP11(hsa)    | OPA3          | FOXRED2   | PIKFYVE       | CACNB1           | VSNL1                    | RAB22A         | ZSCAN9           |
| XXbac-BPG296P20.4-014(hsa) | SEL1L3        | SEMA4F        | ERP44     | PPP1R12A      | HCN3             | H3FD(hsa)                | RAD54L2        | RNF26            |
| H4FN(hsa)                  | RMI1          | ARID1B        | MSN       | C5orf55       | hCG_2023614(hsa) | PIGB                     | PKN2           | hCG_1685949(hsa) |
| CASP8AP2                   | RSP1(hsa)     | KIAA0432(hsa) | ASF1B     | AFAR(hsa)     | SUPT5H           | KLHDC8B                  | AKTIP          | UGT8             |
| FAM195A                    | FAM111B       | IRGQ          | PACS2     | DPPA4         | LGALS3           | PLD2                     | SEMA4D         | VAT1             |
| HIST1H3B                   | HNRNPD        | SRCAP         | SNIP1     | TH1(hsa)      | SYT1             | JAG1                     | GRAP2          | GCFC2            |
| SNRPD3                     | SPC25         | H4/A(hsa)     | ITGB5     | CMIP          | NYMEL3(hsa)      | DUSP3                    | GSTT2B         | HSPC225(hsa)     |
| DPP3                       | NT5C2         | CANPL1(hsa)   | PIP5K1B   | NAV1          | C10orf69(hsa)    | KIAA1846(hsa)            | TNC            | MPP3             |
| HIPK2                      | CHST11        | SLC17A5       | MORF4L2   | FOXL2         | PARD3B           | C11orf54                 | C2orf27A       | H3.3B(hsa)       |
| TMEM63B                    | PITPNC1       | TRPS1         | MAPK13    | RER(hsa)      | IRF3             | KPNA3                    | CRIP1          | TLDC1            |
| CNOT6                      | SH3BP5        | RAF1          | TRAM2     | MB            | DUT              | JADE2                    | C21orf59       | TSPYL2           |

|               |               |             |                |                       |                    |                              |               |                       |
|---------------|---------------|-------------|----------------|-----------------------|--------------------|------------------------------|---------------|-----------------------|
| TMED8         | NXPH4         | GPSM1       | DNF15S2(hsa)   | C3orf33               | C6orf106           | C3orf58                      | RNF182        | FKBP1B                |
| SMAP2         | LZIC          | ADO         | ZNF107         | RIF1                  | CDC42EP4           | MDM4                         | AP3S2         | HSPB11                |
| HSD17B6       | STXBP6        | WNK2        | ACTA2          | SF3B3                 | FNBP3(hsa)         | LARS                         | EIF4G3        | NUCB1                 |
| LACS(hsa)     | UCK2          | FNBP1L      | EPC1           | CDKN1C                | MOGS               | SLC2A4RG                     | TMEM30A       | CAPN5                 |
| DHRS7B        | CDC47(hsa)    | CDCA4       | RHPN1          | TYMS                  | LYSMD2             | RTCA                         | ASTN2         | PATL1                 |
| MPC1          | APLNR         | PRKRIR      | PAX8           | TMED1                 | XRCC3              | KIAA0661(hsa)                | BAG6          | ZCCHC17               |
| CRTC3         | EROL1         | C19orf60    | RAB17          | ICA1                  | ZMYM2              | SEMA4B                       | CDKN1A        | MRNP41(hsa)           |
| MEN1          | DCTN5         | FRK         | RAP6(hsa)      | ANAPC4                | APLP2              | OGFRL1                       | NAGPA         | TMUB1                 |
| SCYL3         | PLC1(hsa)     | REM2        | H2AFD(hsa)     | KCTD21                | C19orf48           | MYO7B                        | SGPP2         | LRRC40                |
| RNF44         | MSJ1(hsa)     | MRPL2       | CASKIN2        | AGO1                  | DNAJA3             | SSR3                         | BCLAF1        | FACL4(hsa)            |
| CTDSP1        | SFMBT2        | MST1R       | MTMR10         | HCST                  | FAM20B             | DKFZp434G1035(hsa)           | SWT1          | FAM129A               |
| MOV10         | TCF4          | FES         | PP6R3(hsa)     | NECAP1                | CD86               | CSNK1G1                      | MAP2K1        | ENTPD4                |
| DSCR4         | NUP153        | ATP7A       | CDABP0131(hsa) | TRERF1                | NDUFV3             | ADI1                         | PCIF1         | TRIM32                |
| DHHDH         | MIER2         | GYLTL1B     | PDS5B          | SLN                   | WASF2              | GOT2                         | STMN1         | DNMBP                 |
| GPR63         | TLR1          | GIN3        | DBF4B          | FBXL6                 | PIG4(hsa)          | SWS1(hsa)                    | UHMK1         | VP572                 |
| SOX4          | MAP3K3        | EXOSC10     | CAPG           | HOTAIR                | CARF(hsa)          | FNIP1                        | DCAF15        | MTCL1                 |
| HID1          | ZNFX1         | MMS19L(hsa) | UMK(hsa)       | GGA2                  | GDE1               | SLC39A6                      | RHOF          | LMF1                  |
| H3FC(hsa)     | SRL300(hsa)   | KDELRL3     | FGFBP1         | RP11-664D7.4          | TBC1D31            | SYNJ2                        | TYW5          | ALG3                  |
| CDIP1         | AP1G2         | PLIC2(hsa)  | RSPH3          | NAV2                  | NFKBIA             | BTF3L4                       | RALB          | RTN4IP1               |
| FBXL3         | TSPAN18       | TCIRG1      | ALKBH5         | CLAPB1(hsa)           | FBXO10             | FUT11                        | POFUT1        | TAF3                  |
| AFAR3(hsa)    | FUT3          | ZNF764      | ZNF337         | DLG4                  | MYO5A              | SMIM13                       | NAPEPLD       | TMEM79                |
| FBXO11        | SOCS2         | NBN         | TMEM256-PLSCR3 | PKP4                  | NENF               | PROSC                        | WTAP          | WDR83OS               |
| PYCR1         | XTP3TPA(hsa)  | LIMCH1      | EPAS1          | CYB5M(hsa)            | MYCBP              | PRKCB                        | PIG30(hsa)    | ZNRF3                 |
| PKIA          | MICAL1        | TIAM2       | LACS1(hsa)     | GBX1                  | PEREC1(hsa)        | KLC1                         | IRAK2         | CRISPLD2              |
| PRO2286(hsa)  | FACL1(hsa)    | RANBP10     | NAP1L5         | BBIP1                 | BEGAIN             | CDC73                        | SYNE2         | TAX1BP3               |
| PHKA2         | GTF2H1        | CIT         | LBR            | SMG9                  | AK3                | MRPL24                       | SLC25A19      | TRIM13                |
| CHST12        | INHBB         | FBXO4       | CKAP5          | RFXAP                 | RNF19A             | RBPMS                        | ATP8B2        | TMUB2                 |
| ESYT1         | NME4          | B3GALT4     | ADAM19         | H3FA(hsa)             | CENPB              | PPA2                         | C3orf38       | ZNF623                |
| OAS3          | GNAS          | C7orf43     | hCG_41078(hsa) | H2BFR(hsa)            | FAHD1              | UNQ2441/PRO5003/PRO9924(hsa) | ZNF354A       | RP11-51112.1-003(hsa) |
| DTL           | PCLO          | TRIM62      | TBC1D30        | HIST2H2A A4           | H3F2(hsa)          | SPRY1                        | C13orf10(hsa) | H3FT(hsa)             |
| SDCCAG16(hsa) | IP6K2         | ZNF664      | NREP           | CLIP1                 | NME7               | TNRC18                       | CLSPN         | KIAA1279              |
| FARP1         | C1QTNF6       | ARFGAP3     | KCNE2          | NOTCH1                | EIF4G1             | HPRT(hsa)                    | JRK           | MYBL2                 |
| DDAH(hsa)     | KIAA0784(hsa) | GMNN        | SLC35A2        | GPR143                | MIA3               | CDC23                        | CHTF8         | RUFY1                 |
| GMIP          | CORO6         | MAPK8IP1    | HIST1H2BD      | SELM                  | H3FK(hsa)          | TRPC4AP                      | TNFRSF12A     | TMEM143               |
| TNK1          | GOSR1         | ATPAF1      | SH3BGRL3       | RP4-697E16.3-004(hsa) | RBBP5              | MARK1                        | C20orf27      | KIAA0224(hsa)         |
| NFIX          | CIB2          | ATG4D       | TFPI           | RSU1                  | NIPA2              | MTERFD3                      | DOCK9         | ROR2                  |
| KEL           | MKL1          | FBR3        | KIAA1612(hsa)  | CAPN12                | 236L13.16-004(hsa) | CXorf3(hsa)                  | AAK1          | ARHGEF26              |
| RNF183        | WARS          | PIGM        | ERGIC2         | FMNL2                 | CEMIP              | SERF2                        | TNRC6A        | AKNA                  |
| CDKN2C        | SIX3          | ECH1        | IKZF1          | GANAB                 | H4/E(hsa)          | ECD                          | BCAN          | SCAMP4                |
| CRLF1         | LAMA5         | VWCE        | C4orf46        | PLCG1                 | MED31              | PEAR1                        | TRAPPC1       | GMEB1                 |
| SLC48A1       | OBFC1         | SLC25A51    | DST            | FAM89B                | CITED1             | ARHGAP29                     | TP53INP2      | TNPO3                 |
| PHF19         | BRPF3         | BCL11A      | HIST1H2BA      | POLR2A                | DENND6A            | YBX1                         | FBXO18        | PDK2                  |
| SCAMP2        | ZNF10         | NT5(hsa)    | SSX3           | TMEFF1                | KIT                | FYB                          | ULBP2         | ANKRD10               |
| ARG2          | THAP9         | ZNF501      | ABHD2          | BTG2                  | LY6E               | STK16                        | SLC2A1        | KCNQ1                 |
| MYBL1         | LEKR1         | CGI-82(hsa) | EFNA5          | POLR2M                | FCER1G             | REPS2                        | HMCES         | ZBTB25                |
| CWF19L1       | TMOD2         | TSGA10      | KIAA0101       | DNAL1                 | HIRA               | PSMC3IP                      | ARF6          | DKFZp586K2.222(hsa)   |
| RHEBL1        | RGS4          | CIDEC       | HES1           | PDLIM1                | RBL1               | NMT1                         | NA            | SLC4A11               |
| TRIM11        | PPME1         | NT5E        | PLAGL1         | ZNF395                | HIST1H2BG          | ILF2                         | KHDC1         | DADB-70P7.10-002(hsa) |
| TXNL1         | SLC25A3       | ERLIN2      | BMP8B          | C1RL                  | ACSF2              | NSMCE4A                      | AKR7A2        | DNAJC2                |
| ATG7          | TAF9B         | ZSCAN22     | VASN           | ENO1                  | XYLT2              | GGT1                         | C1orf109      | HSPC075(hsa)          |
| H3FM(hsa)     | CRK           | ZNF507      | CENPL          | NCOR2                 | SCNM1              | MELK                         | SAMD5         | C14orf159             |
| A2LP(hsa)     | SRP54         | ANAPC8(hsa) | KBTBD6         | SLC16A14              | JMJD1C             | LAMC1                        | IRX3          | NEIL3                 |
| SIN3B         | RED(hsa)      | ZNF706      | PPM1M          | TSC2                  | VEGFC              | FOXF1                        | MBNL1         | ATF7                  |
| C18orf21      | OTX2          | LIN9        | FAM204A        | ARL15                 | PLIN3              | RAI14                        | PRC1          | PCBP4                 |
| TBCD          | GUCY1A3       | BCL2        | ZNF746         | DGKZ                  | HNRNPM             | RAB40C                       | WDR4          | H2BFH(hsa)            |
| DTYMK         | ALDH9(hsa)    | CAT         | OSGEPL1        | B4GALT1               | RBM26              | SFR1                         | C14orf182     | GPR161                |
| ARL6IP5       | SSH1          | CPSF6       | PDS5A          | H3.3A(hsa)            | ZBED3              | RPS6KA3                      | AZIN2         | HBP(hsa)              |
| HMG20B        | GATA3         | DAGLB       | ALDH6A1        | HPS1                  | KCTD7              | FAM124A                      | TMEM201       | STK40                 |

|              |                |            |            |               |           |                        |                        |                       |
|--------------|----------------|------------|------------|---------------|-----------|------------------------|------------------------|-----------------------|
| TUBGCP3      | TRIM37         | PDXK       | TSH2B(hsa) | PABPC1L       | KE04(hsa) | FBXW4                  | NANP                   | MBD5                  |
| FKBP3        | CFL1           | CD151      | ZNF575     | PAQR7         | ABHD14A   | NFE2L1                 | NFIA                   | KPNB1                 |
| PSD4         | COL12A1        | UBA52      | ADIPOR2    | AK6           | PDE12     | NEDD4                  | KLRD1                  | RBAF600(hsa)          |
| SPARC        | IQGAP3         | LRP11      | PAST(hsa)  | JUN           | TTK       | NDUFB2                 | NP95(hsa)              | MYRF                  |
| PHF7         | FKSG27(hsa)    | ARSB       | FAM60A     | MCM3AP        | AAMP      | CNPPD1                 | SRSF11                 | BRWD1                 |
| UGCG         | ARF3           | SLC1A1     | CAPRIN1    | KIAA1521(hsa) | ERCC1     | FOXJ3                  | HIST2H2A               | CBX5                  |
| LPPR2        | CC2D1A         | NRSN2      | MTRF1L     | ZDHHC2        | SAMD14    | ZNF414                 | ABHD12                 | KLF4                  |
| SAR1A        | POLR3F         | HIST2H4    | SLC3A2     | RPS12         | DIS3L2    | SFI1                   | COBLL1                 | STARD4                |
| GUCD1        | TS(hsa)        | SPT5H(hsa) | IER5       | FAM3A         | SUOX      | MKI67                  | ATP2B4                 | TTPAL                 |
| STAT3        | EMILIN3        | PTPRM      | ARAF       | GPR19         | NCAPG     | TSPAN14                | OGFOD1                 | NLRP11                |
| TAGLN        | RNF123         | M7V1(hsa)  | LYPLAL1    | CRTAP         | UBE2Q1    | POC5                   | NOL10                  | RAD9A                 |
| HYPJ(hsa)    | NDUFAF6        | MAP2K3     | EMS1(hsa)  | PPP1R15B      | C1orf213  | AMHR2                  | ANKHD1-EIF4EBP3        | PODXL                 |
| TRIM68       | ZNF114         | HSD17B10   | DDX10      | RBMS2         | TRIM33    | TAF1A                  | MAMLD1                 | HMGCL                 |
| PDE4B        | ARMC8          | PHB        | MTFR1L     | PDLIM2        | CREBZF    | IGF1                   | TEAD2                  | DMKN                  |
| MAN2A2       | ARRDC4         | CD40       | SPIN4      | WDR33         | TGOLN2    | RRP1B                  | GNNG4                  | MXRA7                 |
| E2EPF(hsa)   | ELANH2(hsa)    | SLC45A3    | KIAA1109   | HIST2H2A      | A3        | IL1RN                  | LMAN1                  | PDZK1IP1              |
| HPCAL1       | SIRT1          | MYH9       | ZBTB20     | IL9R          | SLC39A9   | KAT2B                  | BHLHB9                 | FANCB                 |
| NUFIP1       | HOXB8          | HBP1       | CCDC64     | CDK3          | CMTM4     | PAXBP1                 | TNFAIP1                | HIST1H3J              |
| PDGFRA       | SLC35G1        | FAM20A     | MYSM1      | AMZ2          | CPT2      | KLC2                   | DISP1                  | SMOX                  |
| TPPRK        | MED14          | TPBG       | DCTN2      | C19orf54      | GTF3A     | LRRC8E                 | ZWILCH                 | NAA60                 |
| TSPAN1       | THBS1          | RFX1       | ABI2       | TMEM173       | WDR45B    | APEX2                  | ATG9A                  | DYNC1I2               |
| EFCAB14      | STOM           | CD3D       | NFX1       | DSCR3         | MAPT      | ACD                    | RPMS13(hsa)            | ATP6V0A2              |
| HS1BP3       | TBC1D23        | IMMT       | SHISA4     | BABAM1        | MUC1      | PRKAR1A                | HSD17B12               | ATRN                  |
| ARGLU1       | RUNX1          | BIRC5      | DPM2       | FAM209B       | DAG1      | PEF1                   | LINC00337              | FABP3                 |
| DIP2A        | LACS4(hsa)     | TUBB       | KRTAP2-3   | NCAPD2        | RNGTT     | VMA21                  | EIF2S2                 | HIST2H3A              |
| PRKCQ        | IPO9           | SLC31A1    | IFNAR2     | FAM208B       | ASNA1     | KIAA0109(hsa)          | ALG13                  | DAN26(hsa)            |
| SSX1         | EIF4A3         | KIAA0430   | SP2        | TOP2A         | SF3A2     | MYADM                  | PRKCH                  | H4FM(hsa)             |
| FERMT2       | ZNF521         | BCAM       | CREM       | CCND1         | HIST1H4H  | PROSER1                | HHLA3                  | ASXL2                 |
| ENPP3        | EIF3H          | SNX9       | CRAT       | IMPAD1        | SMKR1     | SAP30L                 | DADB-333F21.4-002(hsa) | GPS1                  |
| TOX4         | HIST3H2A       | MACF1      | GPR183     | MAN2B1        | INTS9     | PIG28(hsa)             | MON1B                  | SECISBP2L             |
| RNF144A      | KLRC3          | PTPN21     | C12orf10   | GPC1          | ZNF263    | CSNK1E                 | EIF4EBP2               | LYPLA1                |
| POMZP3       | USP6NL         | CCNF       | KIF12      | JAK2          | ARL6IP6   | SLC39A13               | LSM12                  | ESAM                  |
| CSNK2A2      | MTMR6          | TAF9       | PREB       | GRPEL2        | PAFAH1B3  | RP11-452K12.5-010(hsa) | INA                    | KLHL18                |
| NBL1         | PTRF           | H4/G(hsa)  | NCL        | ILF3          | MSANTD2   | DES11                  | MLXIP                  | TGFBR2                |
| CACNA1A      | SPATA33        | SNTB2      | POC1A      | ZNF133        | SAP130    | SA2(hsa)               | HIGD2A                 | SLC1A5                |
| ELL2         | GTF3C4         | TMTC3      | NAPG       | TNFAIP2       | TLL1      | CYB561A3               | R3HDM4                 | COLGALT1              |
| MIER1        | TMPK(hsa)      | WIPF1      | NAB1       | HIST1H3I      | PABPC1    | EP300                  | ZNF524                 | PCBD1                 |
| EEF2K        | ANXA3          | EME1       | RPLP1      | PFN2          | TBC1D25   | POM121                 | IFI35                  | DADB-70P7.10-003(hsa) |
| BAF155(hsa)  | HDAC7          | NUP98      | FAM222B    | TSR2          | MR1       | MIDN                   | RRM2                   | SLC39A1               |
| TOB2         | ZMYND11        | PHACTR4    | NOGO(hsa)  | WBSCR27       | CDYL      | SUN1                   | VGLL4                  | PTCD3                 |
| CDH2         | HIST1H2AM      | CDA03(hsa) | MT1F       | SRK(hsa)      | MCMBP     | AMOTL2                 | CAD                    | FERMT1                |
| C3orf80      | LGR4           | CEP83      | CMTR2      | SMAD4         | CFL2      | BRE                    | NOH61(hsa)             | RAB14                 |
| G3BP1        | C21orf58       | ANKIB1     | C7orf49    | SLC16A5       | ACADVL    | SRM300(hsa)            | SLC35G2                | TFG                   |
| E2F1         | PTCH1          | MAGEB2     | UNG        | ST6GAL1       | RBM47     | HDLBP                  | SLC39A10               | MAML1                 |
| HSPA1A       | GS3786(hsa)    | SH3GL1     | RBM38      | SLC35D1       | RPS18     | DDAH1                  | CKAP2                  | ZNF641                |
| RAB3GAP2     | ECK(hsa)       | M11S1(hsa) | SPEG       | FNDC3B        | CDCA7     | SLC10A7                | CG1(hsa)               | TMEM200A              |
| RPS23        | AGO3           | NRGN       | KLF10      | SEPHS1        | RBBP4     | ANKMY1                 | C21orf2                | PON2                  |
| PDCD4        | DBN1           | CHRNB4     | SNPH       | C2CD5         | KLHDC3    | GAB1                   | TGIF2                  | ZFAND3                |
| ARHGEF5      | MMP15          | C22orf23   | SLC25A1    | ICMT          | ID1       | ZNF35                  | BCX40G17.4-002(hsa)    | MGAT4B                |
| MASTL        | CABLES2        | DCBLD2     | SFXN2      | RLTPR         | GPR3      | PPARG                  | HIST1H2BB              | MED22                 |
| PCDC5RP(hsa) | RAD51          | APH1A      | RASSF7     | CTNBN1        | APBA2     | TMEM245                | RABEPK                 | PVRL1                 |
| MMS19        | PIP5K1C        | PPP6C      | MPP5       | PLA2G12A      | MRPL10    | ZBTB3                  | LDLR                   | STRADA                |
| ZNF318       | RAB25          | NR4A2      | NT5CP(hsa) | DLGAP3        | NOL11     | ARL5B                  | SLX4                   | RPL15                 |
| TUFT1        | Nbla10545(hsa) | UBL3       | SLC35B3    | RHNO1         | MCPH1     | PRIMA1                 | PDAP1                  | AMN1                  |
| COMMD1       | H1F1(hsa)      | CCDC14     | CCDC85B    | BAF170(hsa)   | PANX1     | KCNAB2                 | SLC29A3                | ATP2C2                |
| TBC1D13      | ABCB9          | ATP6V1D    | TMEM181    | KIAA0153(hsa) | TERT      | PIGT                   | TMEM25                 | PLA2G15               |

|                                   |                                      |                                     |                                        |                                   |                                      |                                             |                                          |                                       |
|-----------------------------------|--------------------------------------|-------------------------------------|----------------------------------------|-----------------------------------|--------------------------------------|---------------------------------------------|------------------------------------------|---------------------------------------|
| ASB1                              | SAC3D1                               | AAGAB                               | G6PD                                   | RP4-657E11.7-008(hsa)             | NYAPI                                | CNTNAP3B                                    | IL17RC                                   | PRMT3                                 |
| PRSS3                             | KIAA1522                             | GYG(hsa)                            | RP11-244N20.4-002(hsa)                 | SLC10A1                           | HIST2H2AA(hsa)                       | TFCP2                                       | DONSON                                   | PTGES3                                |
| FAM167A<br>NPDC1                  | DHCR24<br>CEP57L1                    | FAM127B<br>FZR1                     | NECAP2<br>USP12                        | THOC6<br>VTI1B                    | ZNF426<br>KLHL7                      | NANOS1<br>NOTCH3                            | GDPD5<br>TXNL4B                          | ZBTB47<br>MARCH3                      |
| PRR22                             | PRRG4                                | FAM86B1                             | INSIG1                                 | NTMOD(hsa)                        | NEO1                                 | SLC44A1                                     | RPRD1A                                   | TTC6                                  |
| RTTN<br>MORF4L1                   | NINJ1<br>ZNF681                      | KIFC2<br>DNAJB6                     | H2AFP(hsa)<br>FAM104A                  | RAE1<br>CRY2                      | ARMCX3<br>IPO12(hsa)                 | CCDC169<br>DNAJC21                          | PER2<br>TFE3                             | ATP5SL<br>SNRNP70                     |
| CDON                              | 49N14.8-004(hsa)                     | RAVER2                              | MARC2                                  | MSH6                              | QRSL1                                | SAMD10                                      | MYL6                                     | RAPH1                                 |
| LDHD<br>CRYAA<br>ADAM10<br>NAT6   | IMPDH1<br>TTLL12<br>CLCN3<br>LENG8   | AGO2<br>MCM5<br>LIN28B<br>IL21R     | DFFA<br>TBC1D10A<br>CBR3<br>PAQR4      | C6orf1<br>TUBB3<br>RNF25<br>ASNS  | AFAR1(hsa)<br>TEAD1<br>PKX<br>LRRC8C | NCAPH<br>TAX1BP1<br>GNAQ<br>BCCIP           | H2BFF(hsa)<br>SH2D2A<br>DCAF4<br>CHRNA10 | UBE2C<br>PTPRH<br>HSPB4(hsa)<br>FADS3 |
| CAPN2                             | PRSS8                                | IMP4                                | CBFB                                   | SNRPA                             | hCG_2018597(hsa)                     | FAM73A                                      | NUP155                                   | GCNT2                                 |
| CXCL16                            | ATMIN                                | PKLR                                | PRADC1                                 | RRP8                              | BAZ2A                                | PPP2CB                                      | MOB3C                                    | XXbac-BPG296P20.4-010(hsa)            |
| EMP1<br>HIST1H3A                  | CDKAL1<br>AMPD3                      | AFF4<br>FBXO6                       | GCH1<br>SIDT2                          | RHBDF1<br>NEDD8                   | CHIC1<br>SMARCC1                     | RPUSD3<br>H1F5(hsa)                         | HK1<br>PP781(hsa)                        | BAD<br>RPI(hsa)                       |
| VASH2                             | RPSA                                 | ANKRD17                             | TP53                                   | WDR76                             | STRN3                                | CDK17                                       | ASCT2(hsa)                               | RPA2                                  |
| FBXO32                            | ATAD2                                | STAG2                               | BMP1                                   | RNF208                            | HIST1H2AA                            | ZNF780A                                     | PARD3                                    | PPP1R3E                               |
| HIST1H2AJ                         | PWP2                                 | TIMM8A                              | RP1-71L16.2.1                          | MAPRE2                            | SKI                                  | TRMT10B                                     | HEATR5A                                  | DEF8                                  |
| ATP5D<br>UROS<br>OSGIN1<br>ZNF222 | ZNRF1<br>EIF4E3<br>TINF2<br>C11orf30 | ATPIF1<br>NTNG1<br>FAM203A<br>STT3A | RNF187<br>EPB41L1<br>VGL(hsa)<br>EXOC4 | CCNE2<br>DSCC1<br>AXIN2<br>TMEM56 | NADK<br>ANKRD27<br>NT5M<br>CSNK2A1   | SNF2B(hsa)<br>SELPLG<br>CFL(hsa)<br>TWISTNB | SPC24<br>DKK1<br>LRP3<br>ADARB1          | MAF1<br>USH2A<br>BRE1B(hsa)<br>MTHFSD |
| ST6GALNAC4                        | EDEM2                                | HNRNPA0                             | NLE1                                   | DAAP-21F2.8-002(hsa)              | MOB4                                 | KNSL6(hsa)                                  | ZBTB4                                    | ELK1                                  |
| EPHB2                             | C10orf54                             | C1orf86                             | RBPM52                                 | ATP1B3                            | CFLAR                                | DKFZp434N101(hsa)                           | TRIM2                                    | COQ2                                  |
| FAM53B                            | AKIRIN2                              | GRHL2                               | PLEKHA5                                | GFPT1                             | KIAA0839(hsa)                        | CHML                                        | FIP1L1                                   | CMPK1                                 |
| FBXO46                            | TPR                                  | PLA2G6                              | TMEM140                                | INPP4A                            | GLUT3(hsa)                           | PSMD7                                       | IFI27L1                                  | SLC30A6                               |
| CEP152                            | ANKRD52                              | DOLPP1                              | ACS4(hsa)                              | FASTK                             | IFT5                                 | CELSR3                                      | GORASP2                                  | ARHGAP22                              |
| NFKB1                             | MAP2K7                               | IRF2BP2                             | FGFRL1                                 | SLC25A13                          | FKBP8                                | RP11-16N10.1-004(hsa)                       | HMGCS1                                   | MTDH                                  |
| SAFB2                             | NSUN5                                | KEO4(hsa)                           | PLA2G10                                | SMARCC2                           | GGCX                                 | GLTSCR1                                     | PTPN12                                   | GPR137C                               |
| IRF4<br>EXT1                      | PVRL2<br>MOB3A                       | NA<br>DGCR2                         | B3GALNT1<br>TARS2                      | CCDC163P<br>TAPBP                 | CDKN2AIP<br>DHX38                    | ABCA7<br>SEPT3                              | H4/D(hsa)<br>OPN1SW                      | LPGAT1<br>PRR11                       |
| DHPR(hsa)                         | H4FK(hsa)                            | RASIP1                              | UBAC1                                  | RFTN1                             | AKR7A4(hsa)                          | CLN6                                        | EXOSC6                                   | ENO2                                  |
| PCOLCE2                           | H1F2(hsa)                            | FBXL2                               | C10orf11                               | E2F5                              | WDTC1                                | ADTAA(hsa)                                  | BARD1                                    | ZNF428                                |
| MANEA                             | TNXB                                 | GCOM1                               | AGFG2                                  | TYRP1                             | TFCP2L1                              | POLD(hsa)                                   | SMPD1                                    | TNRC6C                                |
| PTPRU                             | SPATA2                               | SLC38A7                             | MOCS3                                  | SSF42                             | JAK3                                 | ALAD                                        | GAREML                                   | ST6GALNAC1                            |
| S100A16                           | ELK3                                 | HIST2H3C                            | C11orf23(hsa)                          | ST3GAL2                           | SLC13A3                              | MRE11A                                      | LIMA1                                    | N4BP1                                 |
| NTNG2                             | TMEM184B                             | MCFD2                               | LITAF                                  | HECTD3                            | NAMPT                                | RHBDF2                                      | LMF2                                     | ZNF282                                |
| TOP3A                             | PPP2CA                               | FAM103A1                            | KNS(hsa)                               | PIGC                              | XAP4(hsa)                            | JDP2                                        | SHANK2                                   | FANCI                                 |
| MET                               | SPATA31A7                            | MYO1C                               | PPP1R11                                | C17orf53                          | RPL5                                 | ARHGAP42                                    | MTAP                                     | MCM10                                 |
| ATP6V0E1                          | PITHD1                               | PRDM11                              | DDX21                                  | SAP30BP                           | PRPF38B                              | TRPM4                                       | WAVE2(hsa)                               | RNF216                                |
| SLC6A6                            | SLC22A18                             | TM9SF4                              | PHF6                                   | STRBP                             | MTSS1                                | ATF7IP                                      | PIGF                                     | WDR96                                 |
| UTP14A                            | H4/J(hsa)                            | C9orf16                             | FAM178A                                | LARP(hsa)                         | PLEKHG5                              | IGFBP2                                      | SGSM2                                    | SYVN1                                 |
| FSTL3                             | XK                                   | RP11-265M18.2                       | PRRC2C                                 | SLC8B1                            | CPEB2                                | BRD3                                        | ZFP41                                    | RHBG                                  |
| TROVE2                            | INPP5J                               | BHLHE41                             | CLEC4M                                 | MRPS30                            | CNKSR3                               | ACRBP                                       | RP11-197M22.1-003(hsa)                   | KIAA1715                              |
| SLC10A3                           | SMIM20                               | MEF2D                               | MCTS1                                  | AK9                               | TMCC1                                | GPIAP1(hsa)                                 | EIF5A2                                   | ORAI3                                 |
| SLC39A8                           | H3F3(hsa)                            | CDKN2B                              | CDC42EP1                               | TIGD6                             | CAND2                                | C18orf54                                    | CCNI                                     | MYLK                                  |
| FGD1<br>SPRYD4<br>CBFA2T3         | SCPEP1<br>GABRG3<br>FLOT1            | MTMR9<br>SRM<br>INTS8               | MTURN<br>SEMA3F<br>SEC61A2             | C1orf85<br>TSEN15<br>GIGYF2       | CYSRT1<br>COMTD1<br>CDK18            | KIAA0030(hsa)<br>TGM2<br>WDR3               | TMEM263<br>PRODH2<br>HMGN4               | GTF2F1<br>VPS54<br>ACCS               |
| FEZ1                              | SMARCA4                              | MOB1B                               | ANXA5                                  | KIAA1207(hsa)                     | FGF9                                 | S100A3                                      | HNRNPL                                   | D3F15S2(hsa)                          |
| hCG_39482(hsa)                    | GTF3C3                               | SLC25A20                            | C9orf69                                | PIGL                              | PTPN11                               | TMEM92                                      | RUFY2                                    | WRN                                   |
| FANCD2                            | KIAA0312(hsa)                        | C20orf193(hsa)                      | DCTN4                                  | MPHOSPH6                          | POM121C                              | GRK6                                        | ERGIC1                                   | SUV39H1                               |
| GTF2E2                            | PLCD3                                | STAG1                               | ASHIL                                  | C1orf61                           | HGS                                  | ANKLE1                                      | PPIG                                     | BAZ1B                                 |
| H4/C(hsa)                         | SSX5                                 | MFAP2                               | MBD3                                   | QARS                              | TMEM246                              | GJC1                                        | MAP1A                                    | MCM3                                  |
| ZNF273                            | GNPDA1                               | PTPRN                               | ADAMTS2                                | H3F3AP6                           | MAD2L2                               | NLRC5                                       | NAV3                                     | PID(hsa)                              |

|                               |                   |                   |                         |                                |                        |                             |                    |                    |
|-------------------------------|-------------------|-------------------|-------------------------|--------------------------------|------------------------|-----------------------------|--------------------|--------------------|
| SSH2                          | BCL2L13           | URI1              | S100A2                  | MRPS25                         | GCF2(hsa)              | RP11-108M9.3                | CCNJL              | PNISR              |
| UBP1                          | FAM218<br>A       | SRGAP2C           | SSX2                    | DDX11                          | CDC42SE2               | SDHA                        | CCNK               | TMBIM6             |
| HFE2                          | FGFR4             | GPATCH<br>2L      | MND1                    | ALAS2                          | C2orf49                | SEZ6L2                      | HAUS5              | KDM4C              |
| ADCY1                         | CPEB4             | PRP16(hsa<br>)    | PCSK7                   | MAOA                           | KLK1                   | MAGI1                       | ID3                | CCNL1              |
| SLC44A5                       | L3HYPD<br>H       | CDCA5             | METTTL23                | C1orf210                       | FARP2                  | CNOT1                       | STAT1              | RCH2(hsa)          |
| RRAGD                         | CALB2             | TIP47(hsa<br>)    | HLA-DMA                 | CDV3                           | RNF181                 | ZNF281                      | HIPK1              | GINM1              |
| MYB                           | SP140L            | DHX37             | SRSF1                   | PIG1(hsa)                      | XXyac-<br>R12DG2.2     | EFNB1                       | ENY2               | H1FX               |
| CALCOCO<br>2                  | NOL3              | DAP               | MYNN                    | INPP5K                         | GPS2                   | PTP4A3                      | AHNAK              | NNT                |
| IGSF9                         | GAPDH             | TRMT61<br>A       | PURB                    | KLHL32                         | NPNT                   | RP11-269F19.1-<br>004(hsa)  | SEPT6              | ZNF703             |
| TOM1L2                        | INTS3             | CTAG2             | CSMD2                   | HYAL3                          | PHC2                   | ADCK4                       | RIMS3              | RHOG               |
| HNF4A                         | HDAC1             | CTSD              | CCDC97                  | FAM92A1                        | COX4I1                 | UBE2D3                      | HIST2H2B<br>E      | ECE1               |
| NDST1                         | UBIAD1            | ARID4A            | ACSS2                   | Z82214.4-<br>003(hsa)          | GAS8                   | CASP6                       | TRPM7              | CCND3              |
| CDT1                          | ING3              | POLD1             | HUS1B                   | ARL3                           | YWHAZ                  | FNDC4                       | LUZP1              | MED8               |
| RP4-<br>695O20_B<br>.10       | GALT              | STRIP2            | LRPPRC                  | MXI1                           | CDAN1                  | DAMA-236L13.16-<br>002(hsa) | PRKDC              | SYT16              |
| BBS2                          | NA                | SPHAR             | EVL                     | C1orf131                       | YKT6                   | WHSC1                       | TMEM206            | TBRG1              |
| ANO6                          | MIR1199           | FAM86A            | LCP1                    | AXL                            | DKFZp781H1<br>755(hsa) | COX15                       | RP11-<br>20123.8   | NR2F2              |
| ZDHHC21                       | AFF1              | TJP2              | CXCL3                   | WWC3                           | EIF4ENIF1              | ZNF319                      | KCTD15             | ZMYM3              |
| ARMCX5                        | COPS7B            | TNFSF15           | ZNF467                  | SAMD4A                         | ERAL1                  | LOXL1                       | APIG1              | RRAS               |
| SDR39U1                       | MCM6              | KIAA033<br>2(hsa) | ZNF548                  | KNS2(hsa)                      | FBXL19                 | PHF12                       | SMAD7              | CARHSP1            |
| CCNB1                         | MED21             | FAM83A            | SREBF2                  | NUFIP2                         | CRELD1                 | DNAL4                       | ORC6               | KIF5B              |
| TOR1A                         | DCAKD             | TNFAIP3           | ZNF358                  | ADNP1(hsa<br>)                 | C1orf159               | TOM1                        | PRKAR2B            | NCOA1              |
| ATP2C1                        | PLAGL2            | KIAA006<br>1(hsa) | ENKD1                   | POGK                           | PRKX                   | EIF4E2                      | SURF2              | LIN37              |
| TTL                           | TFEB              | ELP5              | FAM188B                 | RUNX3                          | CLAPA2(hsa)            | CHMP3                       | CDC42GAP<br>(hsa)  | ST3GAL4            |
| VPS45                         | PME1(hsa<br>)     | DTNB              | ZDHHC12                 | TP73                           | SLC25A36               | HNRNPH2                     | CIZ1               | ACOT8              |
| PINK1                         | C19orf84          | PLEKHH2           | TAF12                   | RAPGEF2                        | CUL7                   | TMED6                       | BVES               | SLC27A4            |
| UCK(hsa)                      | LFXN              | THRA              | HIF1AN<br>XXbac-        | UCP2                           | TIGAR(hsa)             | DMPK                        | CYCS               | HIST2H2AB          |
| UMPK(hsa)                     | MTX3              | CCSER2            | BPG254B15<br>2-002(hsa) | RAB1B                          | NTPCR                  | CREB3L2                     | MEF2C              | SOBP               |
| RIN1                          | NE2               | PI4KB             | BTF(hsa)                | NFATC2IP                       | RFX3                   | ATXN7                       | GLRX5              | GPATCH4            |
| GDAP1                         | ZNF33B            | RAB21             | RHOC                    | MSL1                           | ZNF708                 | EPS8R2(hsa)                 | CEP55              | H2AFQ(hsa)         |
| HOXC9                         | USP1              | SIRT5             | SENP6                   | H4FH(hsa)                      | CPT1(hsa)              | TSPYL1                      | UBE2W              | DAXX               |
| NUP62                         | ACVR1B            | IMPD1(hs<br>a)    | IL22RA1                 | MARCH2                         | REXO2                  | TFB1M                       | RBP5               | HSJ2(hsa)          |
| UBR1                          | KIF15             | LETM2             | SIRT2                   | TMEM243                        | SPFH2(hsa)             | DHRS13                      | C8orf2(hsa)        | ABCF1              |
| SOCS4                         | KIF2C             | CDK1              | ZMIZ2                   | TRAK1                          | MBD6                   | CYB561                      | TMEM127            | PDGFRB             |
| MED13L                        | LRRC8A            | GON4L             | ZNF385C                 | C1orf198                       | GDI1                   | EPM2AIP1                    | hCG_41525<br>(hsa) | PIN4               |
| IL18BP                        | TNS4              | AIM1              | ECM1                    | DYNC1L12                       | MFSD3                  | GINS2                       | MKNK2              | ARHGEF3            |
| MRPS26                        | p16lnk4a(<br>hsa) | MLLT3             | HPSE                    | ZNF503-<br>AS1                 | ZNF592                 | SIX5                        | PSRC1              | ZNF689             |
| BCL9                          | DDX56             | SFT2D2            | RECK                    | CISH                           | VPS45B(hsa)            | CNTNAP3                     | FANCA              | PTPN18             |
| TENC1                         | UBQLN1            | GPR158            | CTTN                    | FABP5                          | CYP51(hsa)             | TCTA                        | SIGIRR             | PHLDA1             |
| NOGOC(hs<br>a)                | TMEM16<br>1A      | TBC1D2            | GABPB1                  | PRO0750(h<br>sa)               | PSMB2                  | PARP1                       | ZIC5               | HOXA13             |
| LPPR4                         | NR6A1             | LAMP3             | UBA2                    | IFRD2                          | STIM1                  | GK5                         | DCLRE1B            | WBP11              |
| SRR                           | CDKN3             | TMBIM1            | EEF1D                   | PTPLA                          | MTA2                   | SLC9A3R2                    | HERPUD2            | RP11-<br>65F13.2.1 |
| FIGF                          | TGFA              | JOSD2             | OSR2                    | CNNM3                          | SEMA4C                 | CTSB                        | PDE7A              | C19orf1(hsa)       |
| CYFIP2                        | C10orf10          | NUP160            | CCDC150                 | OMB5(hsa)                      | TAF4B                  | H3F3B                       | PLK1               | ARRB1              |
| RPF1                          | AP2B1             | SLC37A4           | VICKZ3(hs<br>a)         | PALM3                          | FAM81A                 | FOXP2                       | ZNF367             | C21orf33           |
| FGD6                          | DLG1              | SHCBP1            | ICAM1                   | HIF1A                          | hCG_15646(h<br>sa)     | RPL37A                      | RP11-6D1.6         | CYB5R2             |
| CIC                           | SORT1             | SPCS2             | NLRX1                   | PPP1R10                        | TRIP5(hsa)             | WWOX                        | TSN                | ADAM15             |
| COMMD9                        | HIST1H2<br>BO     | TEAD3             | RNF40                   | CLN3                           | H4/O(hsa)              | HNRPUL1(hsa)                | GYS1               | CD44               |
| RP11-<br>569G9.2-<br>002(hsa) | PHGDH             | TMEM10<br>9       | ZNF207                  | TREX1                          | TMPO                   | SEC24B                      | ARPC4              | AP2M1              |
| C15orf26                      | DDX38(h<br>sa)    | MTFMT             | H4/M(hsa)               | E2F3                           | TNK2                   | SERPINB5                    | ZFP36L2            | TFAM               |
| PAQR5                         | RSF1              | EPN2              | ITSN2                   | POGZ                           | SRRM2                  | CLPTM1                      | RWDD2B             | PRKACB             |
| GNA12                         | TBCK              | MSL2              | HNRNPK                  | ARFRP1                         | RNFT1                  | MPHOSPH9                    | SUFU               | ARHGEF28           |
| PSMD5                         | RTFDC1            | EIF4EBP1          | TNRC15(hs<br>a)         | SUSD2                          | CAPN10                 | CAPN1                       | H4/B(hsa)          | SERPINA1           |
| HES2                          | NEURL1<br>B       | GSTM1             | GRN                     | DAMC-<br>157M7.11-<br>002(hsa) | PTPRG                  | SLC22A17                    | VEGFB              | MAP1B              |
| NUMBL                         | XRCC1             | IFT57             | SIPA1L1                 | CYB5D1                         | CCDC167                | F12                         | C16orf13           | CD47               |
| SNRPD2                        | E2F8              | SLC26A6           | PP2593(hsa)             | APITD1                         | H2AFR(hsa)             | STAMBIP                     | AURKB              | H2AFA(hsa)         |



|                       |                   |                       |                  |                       |               |               |            |                       |
|-----------------------|-------------------|-----------------------|------------------|-----------------------|---------------|---------------|------------|-----------------------|
| NUCB2                 | FACL2(hsa)        | LONRF1                | STC1             | RP11-176F3.6-007(hsa) | TEX261        | DLD           | ZNF3       | C14orf154(hsa)        |
| EV15L                 | CHD8              | MINK1                 | MIS18BP1         | RGMB                  | GEMIN5        | SLC5A2        | UPP1       | SWI5                  |
| RP11-321N4.1-004(hsa) | NRDE2             | LLPH                  | AZIN1            | H4FB(hsa)             | RPAP1         | CERS6         | MBLAC1     | SOX5                  |
| SR140(hsa)            | USP20             | C15orf38              | RIMS4            | NRIP3                 | H4FO(hsa)     | TMEM150C      | USP11      | MIER3                 |
| TPD52                 | SMIM1             | CENPQ                 | GLTP             | MCTP2                 | KLHL15        | NA            | HIST1H1B   | VAMP2                 |
| VPS45A(hsa)           | APEH              | TIFA                  | RALGPS2          | C2CD2                 | PRIM1         | GAPVD1        | TMEM5      | ADH5                  |
| EIF2AK1               | TIMMDC1           | MFN2                  | GAPEX5(hsa)      | VPS37A                | FXR1          | DDX39B        | NASP       | MPV17L2               |
| UBE2E3                | CYP51A1           | DDX17                 | VAV2             | KRI1                  | CDCL1(hsa)    | G3BP2         | CMK(hsa)   | CAMTA2                |
| ZNF621                | 157M7.11-003(hsa) | RAB12                 | C19orf82         | HJURP                 | MBLAC2        | RBBP7         | ADK        | XYLT1                 |
| RFX2                  | DBNDD1            | RFNG                  | TXNDC16          | TMEM97                | MTA1L1(hsa)   | SEC22A        | KHNYN      | C17orf80              |
| ST3GAL3               | IST1              | DCTPP1                | H2AFV            | GIN51                 | TSPAN4        | C7orf55       | NFYC       | teag7.648(hsa)        |
| AREL1                 | MBOAT7            | DHFR                  | ZNF317           | FUT2                  | RASA4         | SPATA20       | UBE2S      | ALDH7(hsa)            |
| SH3BGR1               | SEPT1             | EGFR                  | DCAF7            | OPHN2(hsa)            | CDH24         | FBXO27        | PLEKHG6    | ATG4B                 |
| C1orf43               | OGT               | SSR2                  | PP13181(hsa)     | GDAP2                 | SENP1         | CYTH1         | ULK1       | FAM134B               |
| PACS1                 | BTD               | AFG3L2                | SBF1             | CEP41                 | SLC26A2       | PPP2R3B       | MAGT1      | SLAH2                 |
| NELFD(hsa)            | C2CD2L            | SMTNL2                | ZNF253           | HIST1H2AG             | NXPE1         | TRAPP6B       | CWC15      | DGKH                  |
| CD200                 | RPS15A            | KIAA0391              | RAB43            | ATRIP                 | HIST1H2AL     | FAM214B       | C5orf63    | NUDT19                |
| ZUBR1(hsa)            | OAF               | ASPHD2                | APOL4            | NICN1                 | H3F3A         | ANO10         | SRSF3      | LHX2                  |
| SFN                   | ZNF804A           | SLC2A11               | CREB1            | MAPK8                 | H1F3(hsa)     | FAM149B1      | ARGHEF17   | TRIM26                |
| TOMM40                | CDC37             | DNAJC4                | GYG1             | ZAP70                 | LYST          | MF            | FOSL1      | UBR4                  |
| TRIP(hsa)             | HIST1H1E          | TYMK(hsa)             | ETV5             | MPEG1                 | EPHA2         | ADTAB(hsa)    | FUT8       | NLGN3                 |
| CDS2                  | PRPF40A           | PPP3CC                | CDH10            | TMLHE                 | DNM1L         | TP53I11       | SNX25      | NA                    |
| ANGEL2                | SIAE              | P4HB                  | E1BAP5(hsa)      | MIF4GD                | My043(hsa)    | LRRRC23       | MOAP1      | SENP5                 |
| NUDT12                | ALDR1(hsa)        | RP11-511I2.1-004(hsa) | ZNF436           | TMEM116               | CERS5         | ZFR           | WIPI2      | XPO5                  |
| RNF38                 | AKR7(hsa)         | KIAA0097(hsa)         | SORBS3           | ATL2                  | LARP4         | NUTF2         | TRAPP13    | NA                    |
| KIN                   | ALDH3A2           | PRAF2                 | PKP2             | RP11-517O1.1-006(hsa) | CUX1          | VPS33A        | H3FH(hsa)  | HYP(A)(hsa)           |
| KIAA0060(hsa)         | TTC38             | CSTB                  | FBRSL1           | RQCD1                 | RIMKLB        | DNAH14        | AIMP2      | CDC25A                |
| FER1L3(hsa)           | ARHGAP24          | RDH13                 | COL6A1           | ZC3H7B                | SEC31A        | HNRNP1        | ALDOA      | IRF2BP1               |
| MICALL1               | NAP1L1            | KPNA2                 | KIAA1558(hsa)    | C8orf37               | BACE2         | PYGB          | FAM65A     | FNIP2                 |
| MRS2                  | BLOC1S1           | ZYX                   | SEC63            | KTN1                  | TIGD7         | PELL3         | PTHLH      | EREG                  |
| RPS28                 | LTBR              | IER5L                 | OK/SW-cl.35(hsa) | POLR2F                | FAM219A       | GSTK1         | BCAR3      | ENTPD3-AS1            |
| ZBTB38                | STX1A             | KLF7                  | MED4             | MRJ(hsa)              | PSMG1         | CD22          | LERK2(hsa) | RP3-467K16.3-002(hsa) |
| ZNF93                 | GPIP137(hsa)      | EVI5                  | SURF-4(hsa)      | PKMYT1                | ZC3H14        | OAZ2          | NR1D2      | ICBP90(hsa)           |
| CAMKMT                | PVR               | TPX2                  | HSPA1A           | DNAJB9                | RAB40A        | RABGDIA(hsa)  | SUSD3      | C2orf43               |
| NAT16                 | PIK3R2            | GGH                   | SEMA4G           | HERC2                 | RNASE4        | FANCG         | LAMP1      | RP11-1149O23.3        |
| RIPK2                 | PLEKHF1           | FAM174A               | FAM76B           | PAG1                  | LDHA          | DCP1B         | NIPSNAP1   | TGFB3                 |
| MED25                 | ARL2BP            | TMOD3                 | HEATR3           | CSNK1A1               | CTNNB(hsa)    | RDR(hsa)      | HOXC4      | TIMP1                 |
| GLIS2                 | SH3RF2            | ELOVL3                | FRG1             | CREBRF                | LZTS2         | FAM210A       | NT5B(hsa)  | TRIM28                |
| AIM1L                 | ARHGEF12          | KRTDAP                | SZT2             | CGGBP1                | GLCE          | IRGQ1(hsa)    | FGFR2      | MSX2                  |
| PKN3                  | SGPL1             | TRAPP4                | TRIM41           | HME1(hsa)             | FAM3C         | EPHB6         | METTL3     | YY1AP1                |
| C1orf27               | REEP3             | KIAA1578(hsa)         | BM28(hsa)        | CEP68                 | FBXO9         | DGAT1         | UBXN2B     | RXRA                  |
| PEX19                 | SLAMF1            | RPUSD1                | EZH1             | hCG_2040048(hsa)      | KIAA0642(hsa) | AKAP13        | THBD       | WHAMM                 |
| KSR1                  | IL2RB             | NACC1                 | FAM122B          | CAPN3                 | RGCC          | ESYT2         | AK1        | ZNF213                |
| FUS                   | TP53I13           | FAM64A                | C7orf73          | NKD2                  | CRYL1         | GNAI2         | HSPA1B     | SPRY2                 |
| THEM6                 | FBXO42            | SERPINH1              | RGMA             | CYP4F3                | PDRG1         | CPA4          | PRR19      | RPL7                  |
| FITM2                 | ALG1              | ZNF226                | APOA1BP          | RNASEK-C17orf49       | GRINA         | IGFBP3        | STEAP3     | MEX3C                 |
| KIAA0886(hsa)         | SZRD1             | ZNF580                | ARHGEF10L        | RNF24                 | TMEM59L       | PIK3CA        | TRIM58     | CACNB3                |
| ANXA4                 | B9D1              | NOTCH2                | ATG14            | MRE11(hsa)            | PIP5K1A       | H2AFI(hsa)    | IQSEC2     | ZNF581                |
| NELFCD                | TRAF7             | ZNF519                | AGPAT2           | SLC29A1               | FAM120C       | SLMO1         | CDC42SE1   | YTHDC1                |
| ITGB8                 | LMBR1L            | GABARA                | ZNF576           | YPEL3                 | TNFRSF25      | GNB2L1        | SERF1B     | SCMH1                 |
| PGR                   | YWHAG             | CHPT1                 | ASAP1            | RAB1F                 | CHRAC1        | SLC1A4        | C11orf68   | USH1C                 |
| CADM2                 | NPW               | HEATR1                | GOSR2            | CHCHD10               | C6orf62       | KIAA1011(hsa) | MGAT5B     | R3HDM1                |
| FXYD1                 | PORCN             | CARS                  | ZDHHC16          | LNPEP                 | SRC           | NEU1          | ATO8H      | H4FA(hsa)             |

|                       |                       |                       |                  |                        |                  |                       |                         |            |
|-----------------------|-----------------------|-----------------------|------------------|------------------------|------------------|-----------------------|-------------------------|------------|
| FAM126B               | H4/I(hsa)             | PTMS                  | ZBTB46           | AFF3                   | TCOF1            | RALGDS                | SLC27A2                 | DSP        |
| PWWP2A                | C12orf5               | HIST1H3E              | RNF10            | CXorf38                | KLHL23           | FASTKD5               | ITGA6                   | NPWBP(hsa) |
| RHOBTB3               | PPPICC                | TSPAN12               | KIAA1524         | DLC1                   | DNER             | RP11-30H12.3-002(hsa) | IGDCC4                  | SCRIB      |
| WDR7                  | MCL1                  | CHMP2A                | MAPK11P1L        | TIRAP                  | DUSP8            | ZNF211                | hCG_2017814(hsa)        | RPL10      |
| RTN4R                 | PTPN4                 | TMEM132E              | GREB1L           | POLD3                  | STC2             | LGALS8                | NUA(hsa)                | RIN3       |
| ASIC1                 | KIAA1398(hsa)         | GLS                   | EFHD2            | RABGGTA                | PPAPDC1B         | ZNF81                 | CEP290                  | H2BFN(hsa) |
| CDK4                  | POMT2                 | PLOD3                 | EDEM3            | CLEC11A                | PLAUR            | FBXO44                | TMEM200B                | MECR       |
| PROM2                 | TMEM37                | ID4                   | cyclinE2(hsa)    | LINC00472              | SOX6             | GRIN2D                | CLAPA1(hsa)             | ZFAT       |
| JMJD4                 | SAZD(hsa)             | VCL                   | STK32C           | SUPT16H                | ICAM3            | LSM2                  | NAPA                    | IL6R       |
| EPB41L2               | BBS1                  | DHX40                 | CHP1             | DAQB-147D11.2-002(hsa) | CYBB             | KIAA0355              | ZNF618                  | ABRACL     |
| COG2                  | TBL3                  | ARHGAP26              | PPP3CA           | FOXN3                  | hCG_29955(hsa)   | LONRF2                | TANC2                   | UBOX5      |
| GPHN                  | METTL1                | USP47                 | ZBED1            | FAM120AOS              | ANKFY1           | SHMT1                 | METTL7B                 | C9orf142   |
| BSDC1                 | NFKBID                | MAG                   | MLL14            | SNAPC5                 | DDOST            | TAF1C                 | SERINC2                 | CYB561D2   |
| CXCL8                 | PTPRR                 | TLE2                  | AKT2             | MYC                    | CORO2B           | KRT222                | EG5(hsa)                | COA7       |
| RAC2                  | FBXL12                | IMPDH2                | GLUT14(hsa)      | PPP6R3                 | ATF1             | GPSM2                 | EPHA4                   | KCND3      |
| ZNF879                | MRPL34                | CTSC                  | TRIM14           | ADAR2(hsa)             | PTP4A1           | PLXNC1                | RRBP1                   | EFNA1      |
| NUCKS1                | H3FL(hsa)             | AMOT                  | CDA              | DEDD                   | SDAD1            | C5orf24               | DECR2                   | ELF1       |
| BAIAP3                | FAM35A                | VAPA                  | RANBP3           | ZDHHC6                 | PAK4             | VPS39                 | DIXDC1                  | PRR25      |
| BLM                   | ZNF639                | RHOU                  | CD320            | SMU1                   | LRRRC28          | DDA1                  | FAM171A1                | ZCCHC3     |
| METAP1                | RP11-321N4.1-003(hsa) | H4FD(hsa)             | AGPAT1           | MRPL16                 | H3FF(hsa)        | SPINT1                | PDLIM7                  | RBM15B     |
| RDH11                 | TAOK2                 | PLEKHG4B              | ATP6V1B2         | ACAP3                  | FGFR1OP2         | ASS1                  | SCNN1A                  | TXNIP      |
| RAPGEFL1              | ZDHHC8                | DPAGT1                | PCGF5            | TATDN2                 | MESDC2           | IL17RE                | ST5                     | LUC7L2     |
| SCD5                  | UHRF2                 | C9orf117              | UBQLN2           | UBE3C                  | SHOC2            | NCN                   | VEGFA                   | HIST1H4J   |
| HIST1H1D              | ACTG1                 | GM2A                  | RBM8A            | KIF4A                  | DNMT3A           | FAM24B                | TBX18                   | KMT2B      |
| TPM1                  | PCK2                  | RPP25                 | SLC7A1           | PARVA                  | TOLLIP           | CYP1B1                | DAMA-236L13.16-005(hsa) | HIST1H2BO  |
| LSR                   | TSPAN3                | NHLRC2                | FOXP4            | CENPF                  | KMT2D            | SCD                   | SYT15                   | HIST1H4E   |
| RP3-339A18.4-002(hsa) | FOXMI                 | IKZF4                 | D7SR(hsa)        | IKZF5                  | SEPN1            | HOMER1                | PTEN                    | NEFL       |
| KCTD12                | FOXH1                 | ACTR8                 | MAWD(hsa)        | SON                    | VPS26B           | ACSL4                 | KIAA0660(hsa)           | GGNBP2     |
| PREX1                 | DISP2                 | RP3-511B24.2-013(hsa) | MYO1D            | HCFC1                  | LY6G5C           | KLHL9                 | AP2S1                   | HIST1H4B   |
| ATN1                  | SMARCA2               | ARFGEF2               | ARHGAP35         | GFAT(hsa)              | FSCN1            | GRHPR                 | NUB1                    | ZNF785     |
| UBAC2                 | ETS2                  | KCTD5                 | SLC2A3           | HIST1H2AK              | SNF2L4(hsa)      | MVD                   | NFATC3                  | SOCS7      |
| NOTCH2NL              | RR2(hsa)              | XBP1                  | FBXO34           | TRIM3                  | GPALPP1          | SGT1(hsa)             | APBB2                   | F8A1       |
| CCDC92                | KIAA0324(hsa)         | PPP2R5C               | ASAP3            | EPLG2(hsa)             | KIAA0226         | CYB5B                 | PSDR1(hsa)              | C2ORF15    |
| WIP1                  | RABGAP1               | ITM2B                 | TTC28            | KOC1(hsa)              | SLC25A22         | TFIP11                | ZC3H4                   | CT45A1     |
| CTNND1                | WDR70                 | hCG_39606(hsa)        | SLC9A3R1         | CD46                   | C1orf56          | LGALS1                | TTC19                   | CYFIP1     |
| FAR2                  | SATB2                 | NDRG1                 | C8orf58          | NOS3                   | MPZL2            | CHAF1A                | CDPF1                   | ZNF230     |
| LMAN2L                | HNRNPD                | HSBP1                 | PTPN13           | CTDSPL                 | LDLRAD3          | C14orf28              | FGFR1                   | ZNF2       |
| RP11-51701.1-002(hsa) | PXN                   | SNAI1                 | IDI1             | MYO18B                 | POP1             | DNA2                  | SUPT7L                  | CFHR2      |
| KIAA1324              | TM9SF3                | B3GALNT2              | FOXP1            | FBXL17                 | KDM6A            | EDC3                  | SCARB1                  | NUDT3      |
| NXPE3                 | GSPT2                 | SPATS2L               | hCG_2031635(hsa) | FBXO3                  | NMRAL1           | TNFRSF1A              | DUSP16                  | C5orf22    |
| HSPC130(hsa)          | DBT                   | POLR1D                | ATM              | CD68                   | EPS8L2           | KIF18B                | MARCH6                  | HIST1H2BM  |
| RAD23B                | RC3H2                 | ZNF768                | SOGA1            | RHOGAP1(hsa)           | UBE2K            | SREK1IP1              | PALLD                   | S1PR2      |
| SH3PXD2A              | SLC2A13               | ATAD5                 | RABGGTB          | B3GNT4                 | H2AFO(hsa)       | GUF1                  | ARC                     | HIST1H4K   |
| HIST1H2AI             | ORC1                  | SEC61A1               | ZSWIM1           | MISP                   | CAMK1            | AURKA                 | RP11-90D4.2             | NR4A1      |
| ADCK2                 | EFL3(hsa)             | SPTBN2                | CAPZB            | MARCH8                 | KIAA0462(hsa)    | ESPN                  | SIX4                    | SNX12      |
| H4/H(hsa)             | KIAA1321(hsa)         | FUT1                  | LAMC3            | MKLN1                  | hCG_1992160(hsa) | ZNF644                | SNED1                   | CT45A2     |
| ZNF513                | NUP210                | MGLL                  | SHKBP1           | SEC14L2                | NUP50            | TATDN3                | SGK3                    | PCGF2      |
| hCG_1994842(hsa)      | ZZZ3                  | CDKN2A                | DUSP10           | SMIM15                 | THAP2            | KIF2(hsa)             | TEX264                  | CISD3      |



|             |            |                  |            |                |                     |                   |                   |                |
|-------------|------------|------------------|------------|----------------|---------------------|-------------------|-------------------|----------------|
| FRS3        | TUBB1      | RTKN2            | TAGLN2     | TCTN1          | BCORL1              | ZNF512B           | SPTBN1            | C17orf100      |
| USP25       | RNF39      | MIEF1            | DYX1C1     | TXNRD1         | MMAB                | DKFZp666B209(hsa) | HNRNPUL1          | SERPINA3       |
| ZGRF1       | ZNF16      | KIAA0513         | MINOS1     | LCN2           | H4FE(hsa)           | PCDHGA4           | CHD6              | KLRK1          |
| H2AFJ       | MAPKAP1    | FAM175B          | RFXANK     | BCKDK          | H4FJ(hsa)           | LEPREL2           | EIF3G             | GTF2I          |
| ACSS1       | X104(hsa)  | PPP1R12B         | TIMM10     | NIPSNAP3A      | PEA15               | DNAJB12           | CCDC85C           | RASL10B        |
| TKT         | ACOX3      | RPP30            | FURIN      | PPM1A          | IPO5                | KDM7A             | HSPA1(hsa)        | MYO19          |
| BRD2        | TRIM35     | H6PD             | FLAF1(hsa) | PARP16         | CACNA2D4            | THOC2             | TMEM55A           | CXorf65        |
| USP36       | PERP       | TJP1             | ACP6       | RAB36          | AIF1L               | GNP2              | LATS1             | VAMP3          |
| USP38       | GMFB       | LOXL3            | TES        | TOM40(hsa)     | RARA                | NUP43             | HOXB13            | TSACC          |
| PXDC1       | PMEP1A     | KDM2A            | HECTD2     | ABHD16A        | SNAPC1              | PLEKHA1           | PPP1R1C           | TMEM189-UBE2V1 |
| RNASEL      | SLC35E4    | PGM3             | CECR2      | HSPA14         | CASP9               | D4S234E           | SLC35F6           | SYNRG          |
| ELAVL2      | MYOF       | CDK5R1           | ANKS1A     | COPS3          | CTC-281B15.1        | FAM102A           | CENPU             | FCGBP          |
| FEM1A       | TCF7L1     | C1QBP            | CEBPB      | PRELID1        | SH3RF1              | LEF1              | STYXL1            | HIST1H4D       |
| M6PR        | PAST1(hsa) | PLGLB2           | PERQ2(hsa) | PIGQ           | CPLX2               | OCLL              | AP1B1             | HIST2H2AA3     |
| HNRNPA1     | SMC6       | UBE2J1           | TICRR      | hCG_23463(hsa) | ETHE1               | PVT1              | DMRT1             | ACACA          |
| DICER1      | ARPP19     | UBC              | STK38L     | RAD23A         | RYR3                | MRPL28            | KIAA1841          | NATD1          |
| TMEM205     | WDR27      | RRP36            | IDH3A      | CRBN           | STX18               | LIN7A             | IRAK1             | TAF15          |
| FRMD4A      | GDF11      | NAAA             | GNA11      | PLEKHO2        | SESN2               | KMT2A             | C17orf97          | TFDP2          |
| ACOX1       | NABP1      | H2AFE(hsa)       | ISOC1      | DOK3           | NARF                | ROGDI             | UBALD2            | TPTE           |
| TMEM141     | SERGEF     | ZEB1             | LLGL2      | DEPDC1         | RTP(hsa)            | FAM222A           | IRAK4             | NPHP3          |
| ARSDR1(hsa) | TESK2      | S100L(hsa)       | STRIP1     | SFXN5          | VPS52               | RARG              | NFIC              | MLLT6          |
| CAP43(hsa)  | NKTR       | H2AFN(hsa)       | LYPD3      | SPFH1(hsa)     | CDC7                | LRRFIP1           | DAAM1             | CTDSP2         |
| DRG1        | NPTXR      | TMC8             | GTF3C2     | SFXN3          | RNMTL1              | KIAA0368          | SPSB3             | CWC25          |
| DNM2        | FAM127A    | ZNF280C          | SOSTDC1    | RPGRIP1L       | MNEI(hsa)           | CHCHD6            | PLK4              | IKBKE          |
| SDC1        | CMAS       | TMEM164          | PNT5(hsa)  | CNFN           | RAP1GDS1            | CDK20             | CAP1              | ORAI1          |
| E2F2        | ETS1       | MORN4            | ETNK1      | KHK            | FUK                 | AKR1A1            | H2AFL(hsa)        | WBP1           |
| MLF2        | RILP       | NARS             | PEG10      | USP46          | PPDPF               | HSPC272(hsa)      | BMP7              | ZNF280B        |
| CASP7       | BRIP1      | PPP5K1           | MOB3B      | SCAF6(hsa)     | C6orf89             | ALDH4(hsa)        | 316M21.1-003(hsa) | HIST1H4A       |
| ATXN7L2     | SH3BP2     | HEBP1            | FAH        | TP53INP1       | FGF18               | C8orf22           | ABCA3             | BRD4           |
| TPD52L1     | PTPN14     | OK/SW-cl.73(hsa) | SRRD       | LRP8           | HIST1H3H            | GOLGB1            | EMC1              |                |
| RCN1        | EIF2AK4    | HMP(hsa)         | GHDC       | ELMSAN1        | FAM76A              | PPP1R21           | LRRC49            |                |
| RBM12       | HS2ST1     | TMEM179B         | CUEDC1     | HIST1H3D       | 824I19_A.1-011(hsa) | PDE5A             | BBX               |                |
| SCAI        | POLM       | BRG1(hsa)        | LCORL      | MRPS15         | RP11-874J12.2       | RHBDD2            | INF2              |                |
| ZBTB10      | SYPL1      | MTMR2            | AKT1S1     | ARL17A         | CPCP1               | UBAP2L            | BBS4              |                |
| MAST4       | PSME3      | GAS2L3           | ZNF397     | EQTN           | AUNIP               | MED19             | DCAF16            |                |
| FAM32A      | LRRC8D     | OSBPL7           | GFPT(hsa)  | SLC4A2         | KCNC4               | ZBTB48            | GRHL1             |                |
| CAMK4       | LINS       | QSER1            | WSB2       | C12orf29       | TMED4               | NAGS              | TAF5              |                |

**miR-345-5p**

|          |           |          |          |           |           |                 |        |        |
|----------|-----------|----------|----------|-----------|-----------|-----------------|--------|--------|
| TERF2    | CPSF7     | ZNF664   | LSM5     | SPEN      | FIGL1     | RSBNIL          | DGKD   | DVL2   |
| C17orf85 | PTRF      | NT5E     | DHODH    | GFPT1     | SRRM2     | STARD9          | ZNF106 | PSMG4  |
| AK2      | CDC25B    | BCL2     | LIMS1    | MYLIP     | METTL21A  | DMPK            | NCKAP1 | ZBTB25 |
| NEK7     | DHCR24    | RNF111   | TOP2B    | GCN1L1    | SEC31A    | G3BP2           | PSMA4  | RNF139 |
| ZEB2     | LENG8     | BOD1L1   | PANK3    | CLTA      | AQR       | FASTKD5         | MAN1A1 | EIF1   |
| TMED8    | PRRC2B    | ALDH1L2  | EEF1D    | SLC19A2   | SHOC2     | RWDD2A          | ACIN1  | MGAT4B |
| DAZAP2   | SRP19     | DAP      | GPR35    | RYR2      | KMT2D     | SCD             | XRCC5  | AMN1   |
| GUCD1    | DLG1      | AIM1     | MIS18BP1 | PPP1R10   | IPO4      | DNAJB12         | RND3   | RBM15  |
| LARS2    | SKIV2L2   | IGF1R    | EDEM3    | ARFRP1    | SESN2     | SCAF1           | TCF7   | AUP1   |
| S100A16  | IDS       | FMR1     | AKT2     | F2R       | TNFRSF10B | NDC1            | PHIP   | RTN3   |
| SEN3     | NELL2     | PPM1E    | PCGF5    | PPP6R3    | CYSLTR1   | CTCF            | FBXO33 | TMBIM6 |
| ADCY1    | HTT       | GGH      | SLC7A1   | SON       | C16orf72  | PKN2            | ZNF652 | OR51E2 |
| TTC39C   | CCND2     | PTGR2    | RABGGTB  | STRN4     | DYNLL2    | CDKN1A          | TTC19  | EIF4G2 |
| DNAJC6   | TAOK2     | GNB1     | RPLP2    | TIAL1     | NF1       | UHMK1           | FGFR1  | AP3M2  |
| ATN1     | MOCOS     | BMP6     | ZBTB37   | ZC3H12C   | FAIM      | ANKHD1-EIF4EBP3 | MARCH6 | MIER3  |
| GARS     | DBT       | RHOA     | MLEC     | ECT2      | MALSU1    | CNEPIR1         | SPTBN1 | VAMP2  |
| FAM32A   | BACH1     | EIF1AX   | LARP1    | PSMD14    | KIAA0100  | KIAA0930        | MUM1   | UBR4   |
| MTHFD2   | KIAA0319L | ATP6V1G1 | ZC4H2    | HIC1      | MED28     | DONSON          | MAPK1  | INO80D |
| STK4     | E4F1      | GBF1     | HDGF     | ZC3H13    | EIF2S1    | VPS28           | MTMR3  | TXNIP  |
| MMS22L   | GSE1      | GSTO1    | KLHDC10  | RAB18     | JADE2     | TNPO2           | FBXW11 | GREM1  |
| KIF1B    | NFIL3     | CHD4     | AGO1     | GSTP1     | GSK3A     | BTBD7           | RPL27A | SYS1   |
| UBQLN4   | GPSM1     | SMARCD1  | BTG2     | PPM1L     | SLC39A6   | CKS2            | TET2   | MARCKS |
| ZNFX1    | PERM1     | SLC03A1  | FBN2     | EIF4ENIF1 | LMAN1     | MPPED2          | SYNGR1 | PCGF2  |
| BRD8     | NHLRC3    | CHMP4B   | TOP2A    | NRP1      | PRDM2     | CNBP            | SART3  | MAGIX  |
| UBR5     | FBXO4     | TMEM145  | LPAR1    | IPMK      | ZNF35     | SASH1           | RAD9B  | MYO18A |

**miR-200c-3p**

|          |           |          |          |           |                 |           |          |           |
|----------|-----------|----------|----------|-----------|-----------------|-----------|----------|-----------|
| TERF2    | COP8      | ORMDL3   | QSER1    | EDEM3     | MCTP2           | KBTBD11   | FBXO22   | LATS1     |
| RTN4     | MSMO1     | LMO7     | HNRNPU   | FAM46A    | GDAP2           | EIF3J     | FN1      | THNSL1    |
| RPRD2    | ZNF605    | FZD6     | HSDL1    | PPP3CA    | ANP32B          | C6orf62   | MYCN     | ALDH1A1   |
| SLC9A2   | CCNL2     | SOAT1    | PPP1R18  | DPY19L4   | CEP41           | MAPRE1    | UBN2     | CAB39     |
| HSPA13   | MCM8      | RDX      | SPRED2   | UBA6      | YEATS4          | PTP4A1    | C22orf39 | ATP13A3   |
| ANP32E   | GNS       | TOB1     | VLDLR    | CHURC1    | DNAJB9          | SHOC2     | SPTSSA   | PHOSPHO2  |
| ADAM9    | HNRNPD    | INPP5F   | UBE2I    | PTK2      | PPP2R2A         | DNMT3A    | RAB22A   | NUPL1     |
| CCNG1    | VAT1L     | CTBP2    | VEPH1    | C9orf41   | RNF24           | SESN1     | LRIF1    | RNF168    |
| DUSP4    | DENND4B   | TMEM167B | KRAS     | TTC8      | KIDINS220       | SIAH1     | BAG6     | AMOTL1    |
| RAB4A    | FBXO30    | GAN      | EPDR1    | NLK       | LNPEP           | ANKRD46   | RBM12B   | LATS2     |
| C22orf46 | TCF4      | WNK1     | HEG1     | CEBPB     | GPR98           | PPP1R9B   | ZNF92    | FBXW11    |
| NEK7     | TMED7     | GSE1     | IP07     | MGAT3     | QK1             | SDE2      | UHMK1    | PPP2R1B   |
| ZEB2     | APC       | HOXB5    | SEPT7    | SEPSECS   | ASXL3           | SCO1      | LHFP     | GREB1     |
| MLK4     | CRK       | PBX1     | SETD2    | ISOC1     | SON             | KIF11     | BIRC3    | ABL2      |
| ZMAT3    | FBXW7     | B4GALT6  | SLC35A4  | ARHGAP18  | LPL             | TNFRSF10B | ATG12    | KDR       |
| JARID2   | DHX29     | NBR1     | SERINC1  | TUBB4A    | DOCK5           | SURF4     | BDP1     | USP33     |
| CASP8A2  | UHRF1BP1L | TRPS1    | FSTL1    | GART      | MARCH8          | FAM220A   | SYNE2    | RANBP9    |
| CNOT6    | SHC1      | MGA      | FBXL16   | CCDC127   | MKLN1           | CHD2      | NAA16    | RAD21     |
| GSKIP    | SIRT1     | GAL3ST1  | SLC16A9  | BRCA1     | SMIM15          | DZIP1     | ARF6     | KMT2C     |
| FBXL3    | NLN       | CLCC1    | PHF10    | ZNF217    | PLK2            | C16orf72  | USP9X    | CDK16     |
| NTRK2    | RUNX1     | NET1     | TCP1     | ITGAV     | MYO9A           | FAM199X   | MBNL1    | ADCY9     |
| PKIA     | ABCC1     | TMEM64   | CPD      | STK17B    | WSB1            | ST7       | PRC1     | HELLS     |
| UBFD1    | CLCN3     | KLHL20   | MSN      | ZNF697    | TP53INP1        | TSC22D2   | NFIA     | BTG1      |
| COA4     | PAK2      | SLC22A25 | ZCCHC2   | TRIM59    | ELMSAN1         | PPM1F     | TBP      | PCDH9     |
| SLMAP    | ATMIN     | SMARCAD1 | NUDCD1   | TMX4      | SERPINI1        | BTAF1     | GPM6A    | CAPRIN2   |
| TSC1     | AKIRIN2   | PTDSS1   | NAP1L5   | PSMB4     | SNX1            | CLASP1    | CNEP1R1  | BAP1      |
| PIM2     | ANKRD52   | BCL2     | LBR      | CCDC43    | TMBIM4          | ZC3H11A   | EDNRA    | MRPL15    |
| RBM27    | COX11     | CDKN1B   | TAOK1    | PMAIP1    | GLI3            | ADNP      | ALG13    | PAR6B     |
| PEAK1    | SPATA2    | SRGAP1   | RBAK     | CDH1      | ARPC2           | HSPA8     | EIF4EBP2 | SERBP1    |
| ARL6IP5  | MTUS1     | DDB2     | KIAA0101 | RAB11FIP2 | RELN            | FIGN      | PPM1B    | FNBP4     |
| UGCG     | PPP2CA    | STYX     | CANX     | PITPNM3   | BLOC1S5-TXNDC5  | CENY      | MORC3    | RAP1B     |
| ERBB2IP  | SETD7     | MED13    | CDR2     | KIAA1432  | NMD3            | KDSR      | BCL11B   | KLF6      |
| TNPO1    | LRRC8B    | TUBB     | SMG8     | DDIT4     | PCBP1           | CDK13     | NOL8     | FSD1L     |
| UBE2Z    | ZNF431    | SLC31A1  | KBTBD6   | SFXN1     | ANKRD42         | RANBP2    | HMGCS1   | RANBP6    |
| GLG1     | CPEB4     | XPOT     | TIPARP   | NFAT5     | KANK1           | SRP72     | PTPN12   | KIAA1279  |
| POMZP3   | GAPDH     | DDX6     | SIKE1    | MFSD9     | STX17           | FAM13B    | EXOSC6   | PKD2      |
| ZNF638   | ADAR      | RALBP1   | CWC27    | CHMP2B    | VIM             | MDM4      | BCOR     | RNF139    |
| PDCD4    | ZNF131    | SH3GL1   | ALDH6A1  | PIKFYVE   | TMED10          | OSTM1     | CREG1    | CBX5      |
| UBE2R2   | SUGP2     | HIPK3    | FAM60A   | DPPA4     | REL             | B3GALTL   | LIMA1    | KLF4      |
| TM4SF1   | USP31     | DLG5     | NCOA3    | TET3      | FRMD6           | KRT80     | CUL3     | TBL1XR1   |
| OTUD3    | TCF7L2    | PLD1     | DDX60    | ICA1      | ANKRD44         | TAF7      | BTBD7    | WDR37     |
| SPPL3    | PLAGL2    | MYZAP    | LPP      | CHN2      | EIF2S3L         | USP42     | TMEM263  | C14orf132 |
| PPP2R5E  | ZYG11B    | CAND1    | TMEM123  | AP1S2     | LPIN2           | NMT1      | ATP2A2   | DUSP1     |
| FEM1B    | USP1      | PXYLP1   | GIGYF1   | YIF1B     | TTC3            | SLC20A1   | HIPK1    | SPOPL     |
| SMC1A    | UBQLN1    | AGO2     | SKP1     | NAV2      | E-cadherin(hsa) | LAMC1     | AHNAK    | SECISBP2L |
| TROVE2   | DLG1      | KIAA2018 | ANLN     | PAN2      | DBR1            | RPS6KA3   | YES1     | MTSS1L    |
| ZBTB11   | HOXD13    | EPG5     | NSD1     | LARP1B    | ZMYM2           | ERC1      | NRIP1    | PRRC2A    |
| CNOT11   | SMURF2    | MCFD2    | RASSF2   | RSU1      | FLT1            | LMAN1     | ZBTB34   | RAB5B     |
| ID2      | RNF103    | LMNB1    | PLEKHA8  | PLCG1     | KANK2           | VMA21     | KCTD15   | AKAP11    |
| SLC30A5  | RSF1      | ZNF302   | CMTR2    | PHC3      | ZBTB5           | PROSER1   | RGL1     | MAP7D1    |
| PACRGL   | VAC14     | TNKS2    | RPS6KA5  | TOMM5     | SLC38A2         | DES11     | LEPR     | BAG5      |
| RNF2     | CSNK1G3   | GOLT1B   | MFHAS1   | NCOR2     | EIF4B           | PRDM2     | GLRX5    | GOLIM4    |
| MED13L   | PURA      | ATP1B1   | RHOT1    | SLC16A14  | RNF19A          | GAB1      | PLEKHH1  | NIN       |
| WNK3     | OGT       | ELMO2    | TUBA1A   | STX16     | ARMC9           | ZCCHC14   | UBE2W    | ZNF669    |
| DDX3Y    | ZNF597    | ARID4A   | MITF     | PDCD10    | ABHD5           | DCUN1D1   | VMP1     | SYVN1     |
| NDFIP2   | SOWAHC    | CCDC117  | NUAK1    | JUN       | ZC3H13          | S100BPB   | RAN      | KIAA1429  |
| TPD52    | ZNF43     | EFR3B    | DDX21    | ZNF711    | DENND6A         | TWISTNB   | MKNK2    | VKORC1L1  |
| MXD3     | HTT       | FBLN5    | EXOSC3   | CRTAP     | NOL4L           | ATF7IP    | KRR1     | ARHGAP12  |
| SSR1     | ARL2BP    | RPP14    | ABHD17B  | WEE1      | SMAD5           | YIPF5     | GD12     | BCL2L11   |
| GATM     | NEDD4L    | NUP160   | HDAC4    | ATP6AP2   | GALK2           | ZNF281    | TSN      | GTF2E1    |
| ZBTB38   | YWHAG     | NFYA     | ASH1L    | FANCM     | TRIM33          | WHSC1     | ZFP36L2  | NAPIL2    |
| KSR1     | SEC23A    | SHCBP1   | TOP2B    | TXLNA     | ATP11A          | PHF12     | C9orf78  | HCCS      |
| FUS      | MCL1      | IGIP     | PANK3    | CCND1     | MMD             | EIF4E2    | OSBPL8   | GPATCH4   |
| SAR1B    | PTPN4     | CD164    | SRSF1    | WDR82     | CPT2            | CFH       | NEDD1    | XIAP      |
| NUCKS1   | TGS1      | TIFA     | MYNN     | FNDC3B    | ZFFM1           | ILDR1     | CWC15    | ERI1      |
| MGST1    | ZDHHC20   | DNAJC5   | PURB     | EFR3A     | SFPQ            | RIN2      | CMTM6    | MIER3     |
| PREX1    | CDK2      | UGP2     | LRPPRC   | ZNF678    | ITPR1           | BRD1      | CTDSP2L  | RAB34     |
| SMAD2    | RAB7A     | KPNA2    | TAF12    | LPAR1     | CDYL            | DLG       | UHRF1BP1 | PPP1R3D   |
| SH3PXD2A | ALDH1A3   | EV15     | SENPE    | B3GNT1    | CFL2            | CERS6     | SLC35B4  | KIAA1430  |
| BNIP3    | MKL2      | TMOD3    | MTRNR2L4 | TUBA1C    | CDCA7           | DDX39B    | PTAR1    | PPP1CB    |
| USP25    | EEA1      | TARDBP   | RECK     | PVRL4     | BAZ2A           | UTP23     | MOB1A    | C2orf69   |
| CBL      | TM9SF3    | SERPINH1 | GABPB1   | CTNNA1    | STRN3           | KIAA0040  | CDC42SE1 | SYNCRIP   |
| DICER1   | TOMM20    | KPNA4    | ARIH1    | CCNE2     | CDKN2AIP        | SUZ12     | SPIN1    | GRIA3     |
| TPD52L1  | SNX30     | NOTCH2   | IARS2    | GFPT1     | TMEM185B        | HNRNPH1   | PRKRA    | MEX3C     |
| RBM12    | LMBR1     | SQSTM1   | IFIH1    | SMARCC2   | ZFAND6          | SNX13     | SUCO     | TRAPPCC8  |
| PAM      | GMFB      | TAF4     | MED1     | MRPS30    | NPNT            | LGALS8    | ZFPM2    | YTHDC1    |
| MAST4    | TCF7L1    | KLF11    | ITSN2    | SBNO1     | ERIC1           | GALNT2    | ZNF618   | INO80D    |
| AMFR     | ARPP19    | CNIH4    | SLC25A38 | FEZ2      | SLC25A36        | CEP57     | XP01     | ZFAT      |
| REPS1    | BDKRB2    | TIMP2    | AZIN1    | ARL6IP1   | ARL5A           | C5orf24   | TRIM71   | FHOD1     |
| SCAF4    | PITG1IP   | ITM2B    | TXNDC16  | USP5      | BHLHE22         | SCD       | DIXDC1   | GSPT1     |
| IP6K1    | FAM127A   | NRG1     | H2AFV    | NPEPPS    | ZNF280D         | UBE2G1    | GPBP1    | EFNA1     |
| CRKL     | ETS1      | ASPH     | NFYB     | SKP2      | RAP2C           | NGRN      | CPEB3    | SOC57     |
| ARHGAP19 | NRBP1     | RHOA     | TEX2     | WWC3      | KLHL15          | SREK1IP1  | ZNF652   | DACHI     |
| CD59     | HUWE1     | SPATS2L  | SBF1     | BLOC1S6   | NRS5A2          | ZNF512B   | ZC3H4    | MARCKS    |
| STK4     | FRS2      | ENSA     | YME1L1   | LRRC58    | PPIL4           | KDM7A     | FGFR1    | SYNRG     |
| TET1     | CBX4      | MIEF1    | RYK      | FAM8A1    | RCHY1           | ENPP4     | MARCH6   | ACACA     |
| TPCN1    | NRBF2     | CHD7     | DAP3     | PPP1R10   | SLC26A2         | KMT2A     | FDPS     |           |
| RASA2    | BCL9L     | CDK5R1   | ANKRD40  | HELZ      | TBK1            | VEZF1     | DCTN6    |           |

|        |         |       |        |        |       |        |        |
|--------|---------|-------|--------|--------|-------|--------|--------|
| ZNF673 | ALG8    | ZEB1  | KLF13  | PM20D2 | JAZF1 | LIMK1  | HPS5   |
| TRIM52 | PTPRD   | PSAP  | ASAP1  | E2F3   | EPHA2 | GEMIN2 | PI4K2B |
| ELK4   | CAMSAP2 | COPS2 | GREB1L | MXD4   | ASCC3 | DHX9   | ERRF1  |
| CLIC4  | ZNF121  | HIC2  | ACVR2B | PAIP2  | CUX1  | DERL1  | ATL3   |

**miR-10a-3p**

|          |          |           |          |          |          |          |          |          |
|----------|----------|-----------|----------|----------|----------|----------|----------|----------|
| CCNT2    | SMAD2    | KATNBL1   | RAB1A    | CREB1    | CYB5D1   | LYST     | ICK      | USP3     |
| B2M      | DICER1   | GAB3      | QSER1    | MED4     | ATL2     | DDX5     | PLAG1    | HOXA11   |
| KIAA0754 | RBM12    | BRIP1     | TCF19    | GREB1L   | PPAP2B   | DNM1L    | PUM2     | LSM14B   |
| C16orf52 | TMEM33   | SYPL1     | ZBTB6    | EIF5     | DNAJC13  | C6orf62  | AHR      | NME1     |
| PFN1     | POLI     | BACH1     | CDK6     | TES      | LNPEP    | PRKAA1   | PIAS4    | VEGFA    |
| AK2      | PKD4     | NOD2      | KIF23    | STK38L   | STAU1    | ANKFY1   | RSBN1L   | SPTBN1   |
| RBM14    | DIEXF    | GLMN      | DDX3X    | MOB3B    | POLD3    | ATF1     | SPATA6   | FOXO1    |
| HOXB7    | HP1BP3   | PCTP      | COPB1    | PISD     | SRPK1    | IPO5     | FREM3    | MRPS36   |
| ADAM9    | THUMPD3  | CAMSAP2   | INIP     | WSB2     | QKI      | SESN1    | MZT1     | RNF168   |
| SLC38A1  | CLIC4    | FICD      | NID1     | GART     | FBXO3    | MCUR1    | AKAP5    | MAPK6    |
| MED29    | HOXB4    | FZD6      | C12orf75 | TFDP2    | MKLN1    | CDC7     | ZNF564   | FBXW11   |
| EGR1     | MSMO1    | UBE2E2    | PHF10    | BRCA1    | PPM1A    | EBAG9    | G3BP2    | ABL2     |
| FOS      | KIF1B    | TRIP11    | ADD3     | LARP1    | SRSF6    | TRIO     | BRPF1    | GAS1     |
| MTA3     | CENL2    | CHUK      | CCDC71L  | PLCB1    | C21orf91 | RDH10    | SH3BP5L  | DNAJC27  |
| DARS2    | ZNF83    | TMEM64    | HPS3     | DOCK10   | PPP1R14C | INTS6    | ATP6V1C1 | MGAT4A   |
| BRWD3    | HNRNPA3  | ZNF664    | SLCO3A1  | CNIH1    | ITPR1P2  | TSC22D2  | SCD      | PARD6B   |
| PKHD1L1  | C5orf42  | TNFRSF11A | APP      | DDX18    | PLEKHA3  | TXLNG    | SDC2     | MRPL49   |
| ARL4A    | VANGL1   | FOKK1     | MAT2B    | PMAIP1   | PCBP1    | SSX2IP   | SREK1IP1 | TOP1     |
| PAGR1    | PTCH1    | HBP1      | KIAA2026 | ANP32A   | SLC16A1  | CCDC50   | ZNF644   | BRWD1    |
| ZBED5    | DBN1     | SLC31A1   | KIAA0101 | KIAA1432 | CLPX     | HMG20A   | OCRL     | KLF4     |
| PEAK1    | FCHSD2   | MACF1     | PLAGL1   | NFAT5    | SKIL     | RANBP2   | MALT1    | SLAIN1   |
| ENC1     | HLTF     | SQLE      | PDS5A    | PIKFYVE  | ATRX     | HINT3    | XPO4     | PIAS1    |
| TNPO1    | ANKRD52  | COL19A1   | TMEM38B  | PPP1R12A | VCP      | SSR3     | ZNRF2    | ZNF91    |
| ZNF638   | SAMD8    | GLUD1     | KIAA1109 | AGO1     | TTC3     | OSTM1    | SLC7A2   | IREB2    |
| TGFBR1   | CYTH2    | AFF4      | RFX7     | SND1     | IRF3     | FN3KRP   | TMEM45A  | PTGES3   |
| MACC1    | SETD7    | IBTK      | FJX1     | MAPK9    | PSMD14   | FNIP1    | UHMK1    | TSPAN13  |
| KIAA1731 | CEBPZ    | CSDE1     | HK2      | PCNX     | GDE1     | BTF3L4   | BIRC3    | ARHGAP5  |
| IRF4     | HABP4    | STAG1     | AGPAT5   | FMNL2    | RNF19A   | C19orf10 | HIAT1    | AKAP11   |
| PDHX     | ING3     | RNF217    | LPP      | BTG2     | EIF4G1   | AKIRIN1  | TNRC6A   | MDM2     |
| FEM1B    | USP31    | SETD5     | GIGYF1   | PHC3     | RAB18    | ZNF451   | RNF170   | SLC39A14 |
| ARID3A   | FKTN     | SFT2D2    | RCN2     | B4GALT1  | DENND6A  | ARHGAP29 | NFIA     | SLC30A6  |
| MET      | UBQLN1   | ZNF280A   | CMTR2    | PNN      | CSRNP3   | GFM1     | PAN3     | NIPA1    |
| ATP6V0E1 | ATG2B    | AGFG1     | UNG      | PPP1R15B | FOSL2    | NDUFB2   | SESN3    | HMSD     |
| DENND4A  | PID1     | RAB12     | ZNF680   | ABHD17B  | ELOVL5   | LMAN1    | ACTR3B   | BMPR2    |
| ZNF616   | TAF2     | PABPC4    | INSIG1   | FBXO28   | STAM2    | PRKAR1A  | ANKEF1   | BCL2L11  |
| PHF20L1  | TEFM     | DSE       | ZNF354B  | CCND1    | HIST1H4H | VMA21    | ZNF483   | KIF5B    |
| ANO6     | ARHGEF12 | PRAF2     | LRIG2    | SMAD4    | ATIC     | SUMO3    | ZBTB1    | LMO4     |
| CUTC     | MCL1     | UGP2      | PDE4D    | CTNNB1   | PCMTD2   | PROSER1  | PHF13    | PLS3     |
| PSMD5    | RAP1A    | TPX2      | DDX21    | ANXA7    | TEAD1    | EP300    | RASSF8   | DGKH     |
| CHRM5    | CP51     | LY75      | ACBD3    | WDR44    | AEN      | MIDN     | AHNAK    | PPP1CB   |
| SSR1     | ZDHHC5   | PRR5L     | SREBF2   | GFPT1    | USO1     | PRDM2    | YES1     | NDEL1    |
| CAMKMT   | SMARCA2  | TARDBP    | ZXDB     | ASPM     | DOCK4    | DDAH1    | PRKDC    | F11R     |
| RIPK2    | ETS2     | TXNDC11   | RPS8     | PBX3     | IPMK     | SLC10A7  | JADE1    |          |
| PGAP1    | HOXA9    | RDH14     | CTTN     | AXL      | SLC9A9   | BTG3     | TRRAP    |          |
| LAMB1    | RC3H2    | RHOA      | RNF149   | NUFIP2   | DLGAP5   | TMEM245  | PDZD8    |          |
| CXCL8    | CFDP1    | POLR1D    | TRIP12   | ABCC9    | ADAM22   | THTPA    | U2AF1    |          |
| CCT2     | KAT6B    | FEM1C     | ZNF317   | TRAK1    | TFPI2    | ARL5B    | SNX5     |          |
| KDM5C    | PDE10A   | H6PD      | DCAF7    | PAICS    | RCHY1    | MPRIP    | CLSTN1   |          |

## Table A4. Complete output from DIANA-miRPath v.3

Table A4. Complete output from DIANA-miRPath v.3 when using the miRNA signature (miR-34a-5p, miR-345-5p, miR-200c-3p, miR-10a-3p) as input, from both approaches: MicroT-CDS (*in silico* miRNA target prediction algorithm) and TarBase (experimentally supported approach). The columns show the influenced KEGG pathways, *p*-values after Benjamini-Hochberg correction, number of targeted genes and number of associated miRNAs from the signature. Significant *p*-values are highlighted in bold.

| KEGG pathway                                                            | <i>p</i> -value     | #genes | #miRNAs |
|-------------------------------------------------------------------------|---------------------|--------|---------|
| <b>MicroT-CDS</b>                                                       |                     |        |         |
| Mucin type O-Glycan biosynthesis                                        | <b>1.184275e-12</b> | 5      | 2       |
| Glycosphingolipid biosynthesis - lacto and neolacto series              | <b>3.884874e-10</b> | 4      | 2       |
| Biotin metabolism                                                       | <b>0.0006064075</b> | 1      | 1       |
| Proteoglycans in cancer                                                 | <b>0.0007940732</b> | 22     | 1       |
| ErbB signaling pathway                                                  | <b>0.0008384294</b> | 16     | 1       |
| MicroRNAs in cancer                                                     | <b>0.00138567</b>   | 20     | 1       |
| Thyroid hormone signaling pathway                                       | <b>0.002132528</b>  | 16     | 2       |
| Phosphatidylinositol signaling system                                   | <b>0.00647907</b>   | 12     | 2       |
| Neurotrophin signaling pathway                                          | <b>0.009801489</b>  | 22     | 1       |
| Renal cell carcinoma                                                    | <b>0.01097907</b>   | 13     | 1       |
| Glycosaminoglycan biosynthesis - heparan sulfate / heparin              | <b>0.01113265</b>   | 4      | 1       |
| Lysine degradation                                                      | <b>0.01605634</b>   | 5      | 2       |
| Hippo signaling pathway                                                 | <b>0.04556428</b>   | 9      | 1       |
| Axon guidance                                                           | <b>0.04746173</b>   | 13     | 1       |
| TGF-beta signaling pathway                                              | 0.05008158          | 8      | 1       |
| Glioma                                                                  | 0.06553687          | 7      | 1       |
| Circadian rhythm                                                        | 0.06948476          | 5      | 1       |
| Sphingolipid signaling pathway                                          | 0.07745415          | 12     | 1       |
| Glycosaminoglycan biosynthesis - chondroitin sulfate / dermatan sulfate | 0.1093001           | 2      | 1       |
| Choline metabolism in cancer                                            | 0.1191737           | 12     | 1       |
| MAPK signaling pathway                                                  | 0.1518697           | 28     | 1       |
| Sphingolipid metabolism                                                 | 0.1821781           | 6      | 1       |
| ECM-receptor interaction                                                | 0.2101148           | 3      | 1       |
| FoxO signaling pathway                                                  | 0.236839            | 17     | 1       |
| Oocyte meiosis                                                          | 0.248682            | 12     | 1       |
| Glycosphingolipid biosynthesis - globo series                           | 0.2859095           | 3      | 1       |
| Small cell lung cancer                                                  | 0.3219701           | 12     | 1       |
| Carbohydrate digestion and absorption                                   | 0.3981785           | 1      | 1       |
| SNARE interactions in vesicular transport                               | 0.4719691           | 5      | 1       |
| Base excision repair                                                    | 0.5364044           | 1      | 1       |
| Inflammatory mediator regulation of TRP channels                        | 0.5608684           | 9      | 1       |
| <b>TarBase</b>                                                          |                     |        |         |
| Pathways in cancer                                                      | <b>7.806205e-09</b> | 141    | 3       |
| MicroRNAs in cancer                                                     | <b>3.356072e-08</b> | 36     | 1       |
| Proteoglycans in cancer                                                 | <b>4.259346e-08</b> | 82     | 4       |
| Adherens junction                                                       | <b>4.849975e-08</b> | 41     | 3       |
| Colorectal cancer                                                       | <b>6.624356e-06</b> | 37     | 3       |
| Fatty acid biosynthesis                                                 | <b>1.571663e-05</b> | 4      | 1       |
| p53 signaling pathway                                                   | <b>8.629925e-05</b> | 40     | 2       |
| Endocytosis                                                             | <b>0.000155911</b>  | 80     | 2       |
| Cell cycle                                                              | <b>0.0001862279</b> | 52     | 1       |
| Chronic myeloid leukemia                                                | <b>0.0003003506</b> | 37     | 2       |
| Hippo signaling pathway                                                 | <b>0.0005622035</b> | 26     | 2       |
| Metabolism of xenobiotics by cytochrome P450                            | <b>0.0007820423</b> | 2      | 1       |
| Lysine degradation                                                      | <b>0.0007881832</b> | 7      | 1       |
| TGF-beta signaling pathway                                              | <b>0.0009288388</b> | 13     | 2       |
| Prostate cancer                                                         | <b>0.001594596</b>  | 39     | 2       |
| Hepatitis B                                                             | <b>0.002008518</b>  | 54     | 2       |
| Oocyte meiosis                                                          | <b>0.002446339</b>  | 16     | 1       |
| Bladder cancer                                                          | <b>0.002960341</b>  | 22     | 1       |
| Thyroid cancer                                                          | <b>0.003013095</b>  | 16     | 1       |
| Pancreatic cancer                                                       | <b>0.003759289</b>  | 33     | 1       |
| Transcriptional misregulation in cancer                                 | <b>0.004338518</b>  | 62     | 1       |

|                                                            |                    |    |   |
|------------------------------------------------------------|--------------------|----|---|
| Viral carcinogenesis                                       | <b>0.004834794</b> | 74 | 2 |
| Bacterial invasion of epithelial cells                     | <b>0.00518036</b>  | 36 | 2 |
| Ubiquitin mediated proteolysis                             | <b>0.006448268</b> | 22 | 1 |
| Melanoma                                                   | <b>0.007508105</b> | 30 | 1 |
| Non-small cell lung cancer                                 | <b>0.007831112</b> | 26 | 1 |
| Fatty acid metabolism                                      | <b>0.008055732</b> | 14 | 1 |
| Steroid biosynthesis                                       | <b>0.008281795</b> | 1  | 1 |
| Other types of O-glycan biosynthesis                       | <b>0.01126346</b>  | 13 | 1 |
| Protein processing in endoplasmic reticulum                | <b>0.01302932</b>  | 17 | 1 |
| Regulation of actin cytoskeleton                           | <b>0.014233</b>    | 71 | 1 |
| Glioma                                                     | <b>0.01423311</b>  | 26 | 1 |
| FoxO signaling pathway                                     | <b>0.01449044</b>  | 12 | 1 |
| Thyroid hormone signaling pathway                          | <b>0.01501771</b>  | 44 | 1 |
| Endometrial cancer                                         | <b>0.01737389</b>  | 22 | 1 |
| Small cell lung cancer                                     | <b>0.03340758</b>  | 13 | 1 |
| HTLV-I infection                                           | <b>0.04337413</b>  | 81 | 1 |
| Glycosphingolipid biosynthesis - lacto and neolacto series | <b>0.04423077</b>  | 9  | 1 |
| Shigellosis                                                | 0.05387291         | 29 | 2 |
| DNA replication                                            | 0.08411226         | 17 | 1 |
| Renal cell carcinoma                                       | 0.09253995         | 26 | 1 |
| Ras signaling pathway                                      | 0.1004746          | 24 | 1 |
| Central carbon metabolism in cancer                        | 0.1017866          | 27 | 1 |
| PI3K-Akt signaling pathway                                 | 0.1389146          | 29 | 1 |
| MAPK signaling pathway                                     | 0.140083           | 76 | 1 |
| Huntington's disease                                       | 0.1587988          | 2  | 1 |
| Wnt signaling pathway                                      | 0.1749672          | 14 | 1 |
| Alcoholism                                                 | 0.2882482          | 60 | 1 |
| RNA transport                                              | 0.2884383          | 16 | 1 |
| Neurotrophin signaling pathway                             | 0.3112592          | 15 | 1 |
| Progesterone-mediated oocyte maturation                    | 0.4438475          | 31 | 1 |
| Epithelial cell signaling in Helicobacter pylori infection | 0.4488572          | 7  | 1 |
| HIF-1 signaling pathway                                    | 0.5095467          | 35 | 1 |
| Adrenergic signaling in cardiomyocytes                     | 0.52571            | 10 | 1 |

## Table A5. Comparison of studies investigating miRNAs from brain samples

Table A5. Comparison of studies investigating miRNAs from brain samples of FTD and/or ALS patients.

|                                                     | Kocerha et al. 2011[1]                                          | Chen-Plotkin et al. 2012[2] | Hébert et al., 2013[3]   | Gascon et al., 2014[4] | Helferich et al. 2018[5]             | Jawaid et al. 2019[6] |
|-----------------------------------------------------|-----------------------------------------------------------------|-----------------------------|--------------------------|------------------------|--------------------------------------|-----------------------|
| <b>Disease</b>                                      | FTD                                                             | FTD                         | FTD                      | FTD                    | ALS                                  | FTD, ALS              |
| <b>Cohort</b>                                       | Mixed sporadic/genetic                                          | Mixed sporadic/genetic      | Not mentioned            | Sporadic               | Mixed sporadic/genetic               | Sporadic              |
| <b>Patients, n=</b><br><b>Discovery/replication</b> | 32 PGRN+<br>8 PGRN-                                             | 5 PGRN+<br>7 PGRN-          | 5/14                     | 5                      | 5 C9orf72+<br>1 SOD1+<br>16 sporadic | 10 ALS<br>9/12 FTD    |
| <b>Methods of analysis</b>                          | Microarray                                                      | Microarray                  | Deep sequencing, qRT-PCR | qRT-PCR                | qRT-PCR                              | qRT-PCR               |
| <b>Major deregulated miRNAs</b>                     | miR-922<br>miR-516a-3p<br>miR-571<br>miR-548b-5p<br>miR-548c-5p | miR-132<br>miR-212          | miR-132-3p               | miR-124                | miR-1825                             | miR-183/96/182        |

### Figure A1. Stratified nested cross-validation

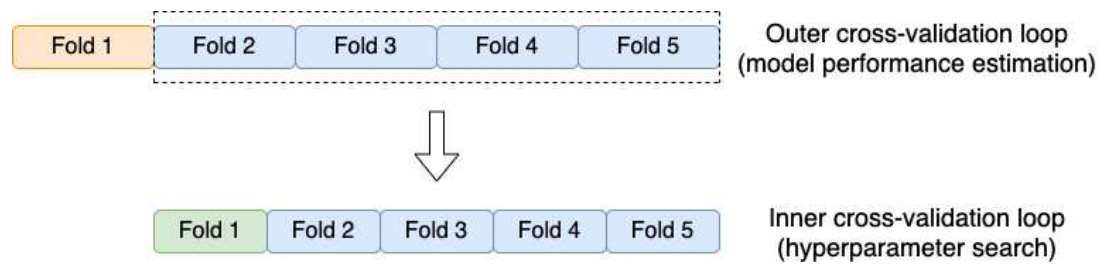

**Figure A1. Stratified nested cross-validation scheme, with 5-fold outer and inner cross-validation. The outer cross-validation loop splits the whole dataset into five folds, using four folds as training data and one as test data at each of its iterations. Model performance is estimated averaging the ROC AUC using all five folds as test data. The inner 5-fold cross-validation loop splits the training data into four training folds and one validation fold at each of its iterations. For every outer loop iteration, one hyperparameter is chosen based on the highest average ROC AUC over all five validation folds.**

## Figure A2. Expression heatmap of miRNA signature

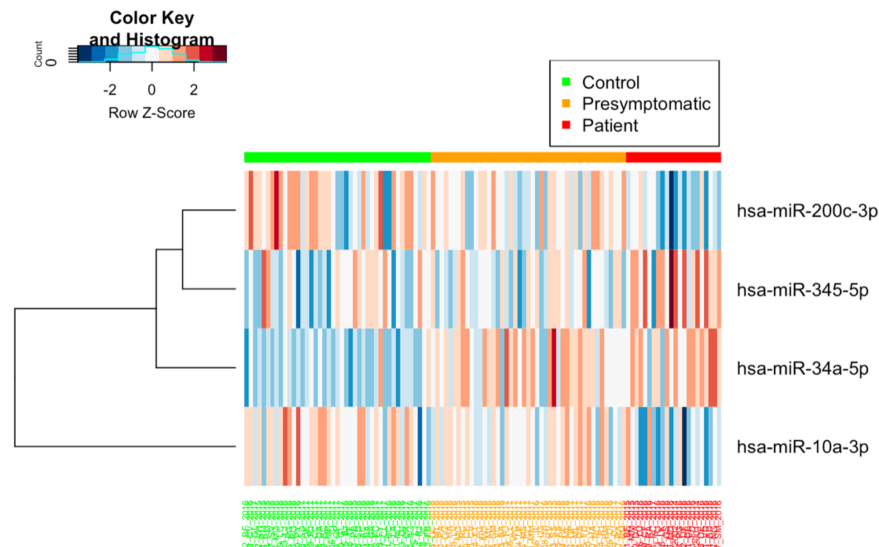

**Figure A2. Expression heatmap and hierarchical clustering of the four miRNAs identified as differentially expressed. Rows represent miRNAs and columns represent individuals ordered by clinical status (control, presymptomatic and patient from left to right). The  $\log_2$  expression levels of each miRNA are rescaled to have a mean of 0 and a standard deviation of 1, and z-scores are indicated by color: shades of blue indicate low-expression values, white indicates mean expression and shades of red indicate high-expression values. Dendrogram added to the left side clusters the rows according to the miRNA expression means.**



### Figure A3. Bootstrapped ROC AUC scores

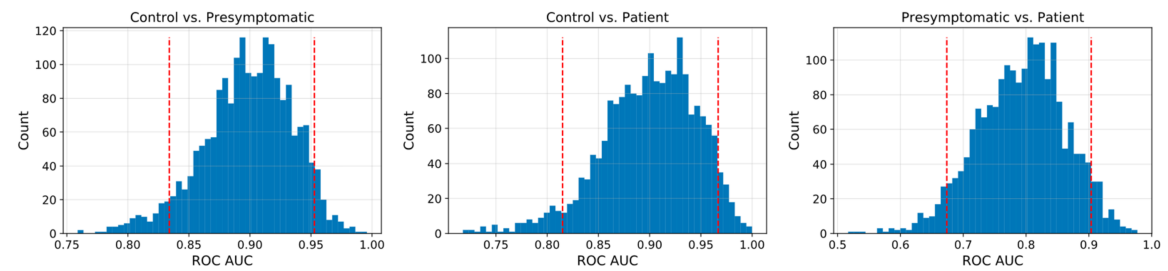

**Figure A3. Logistic regression bootstrapped ROC AUC scores obtained with 2000 bootstrap samples for each pairwise comparison, using as features the expression levels of the miRNA signature (miR-34a-5p, miR-345-5p, miR-200c-3p and miR-10a-3p). The red dashed lines indicate the 5<sup>th</sup> and 95<sup>th</sup> percentiles (empirical 90% confidence intervals): [0.83, 0.95] for control vs. presymptomatic, [0.82, 0.97] for control vs. patient and [0.67, 0.90] for presymptomatic vs. patient.**

### Figure A4. ROC AUC scores with 100 different fold splits

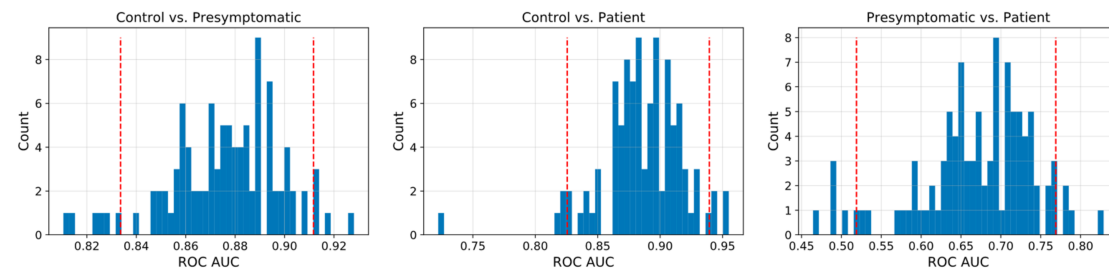

**Figure A4. Logistic regression ROC AUC scores obtained with 5-fold cross-validation with 100 different fold splits, using as features the expression levels of differentially expressed miRNAs computed with only the outer cross-validation loop training data (four out of five folds) at each iteration. The red dashed lines indicate the 5<sup>th</sup> and 95<sup>th</sup> percentiles (empirical 90% confidence intervals): [0.83, 0.91] for control vs. presymptomatic, [0.83, 0.94] for control vs. patient and [0.52, 0.77] for presymptomatic vs. patient.**

### Figure A5. Presymptomatic subjects probability scores

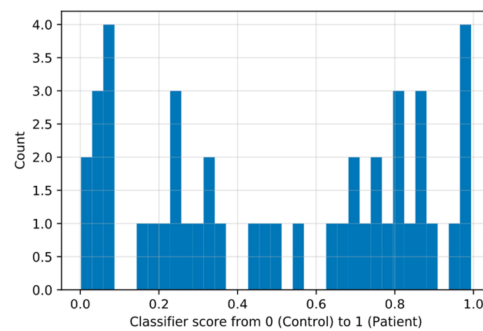

**Figure A5. Logistic regression probability scores for all presymptomatic subjects (N=45), when model was trained with the expression levels of differentially expressed miRNAs in controls (N=43) and patients (N=22). Scores near 0 indicate that the subject has a miRNA profile similar to controls; scores close to 1 mean that the individual has a miRNA profile similar to patients.**

Figure A6. Heatmap of the level of enrichment in KEGG pathways

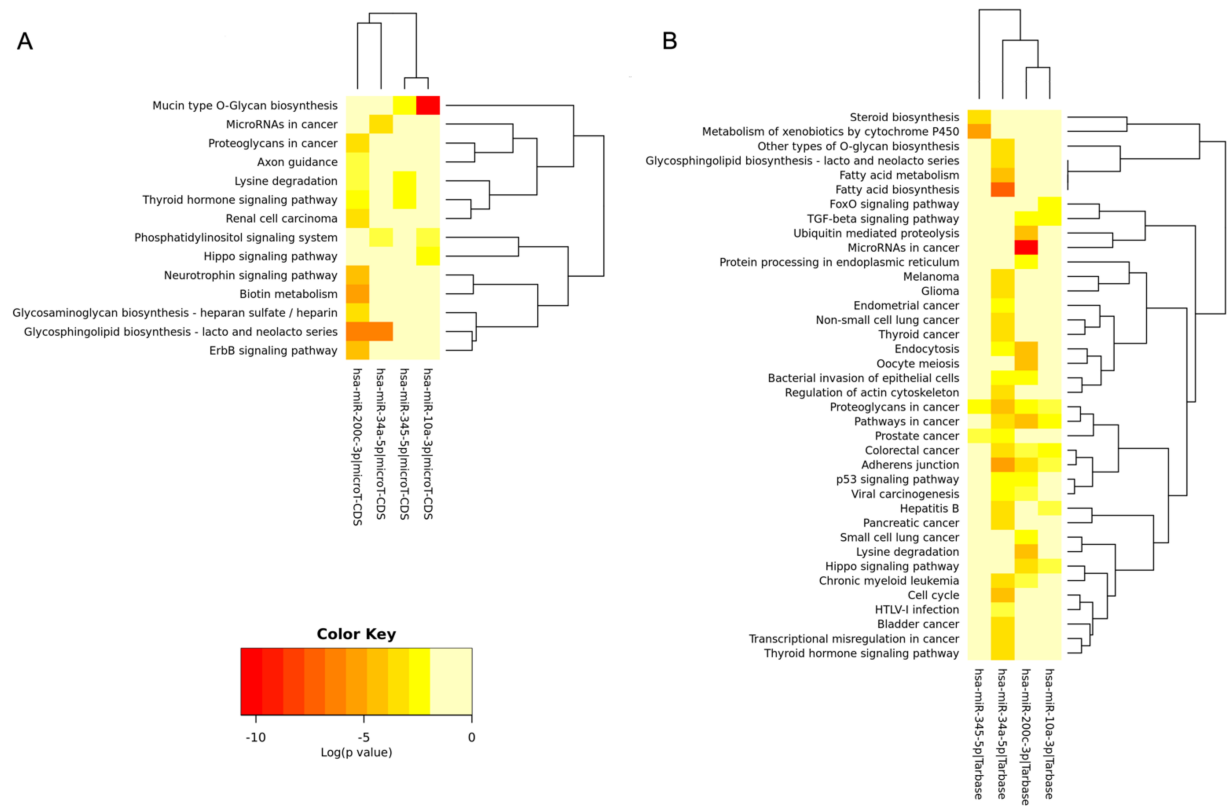

Figure A6. Heatmaps depicting the level of enrichment in KEGG pathways for the four differentially expressed miRNAs, as computed by the *in silico* target prediction algorithm (A) and the experimentally supported approach (B). Pathways with similar enrichment patterns are clustered together.

## SUPPLEMENTARY REFERENCES

- 1 Kocerha J, Kouri N, Baker M, *et al.* Altered microRNA expression in frontotemporal lobar degeneration with TDP-43 pathology caused by progranulin mutations. *BMC Genomics* 2011;**12**:527. doi:10.1186/1471-2164-12-527
- 2 Chen-Plotkin AS, Unger TL, Gallagher MD, *et al.* TMEM106B, the Risk Gene for Frontotemporal Dementia, Is Regulated by the microRNA-132/212 Cluster and Affects Progranulin Pathways. *J Neurosci* 2012;**32**:11213–27. doi:10.1523/JNEUROSCI.0521-12.2012
- 3 Hébert SS, Wang W-X, Zhu Q, *et al.* A Study of Small RNAs from Cerebral Neocortex of Pathology-Verified Alzheimer's Disease, Dementia with Lewy Bodies, Hippocampal Sclerosis, Frontotemporal Lobar Dementia, and Non-Demented Human Controls. *J Alzheimers Dis JAD* 2013;**35**:335–48. doi:10.3233/JAD-122350
- 4 Gascon E, Lynch K, Ruan H, *et al.* Alterations in microRNA-124 and AMPA receptors contribute to social behavioral deficits in frontotemporal dementia. *Nat Med* 2014;**20**:1444–51. doi:10.1038/nm.3717
- 5 Helferich AM, Brockmann SJ, Reinders J, *et al.* Dysregulation of a novel miR-1825/TBCB/TUBA4A pathway in sporadic and familial ALS. *Cell Mol Life Sci* 2018;**75**:4301–19. doi:10.1007/s00018-018-2873-1
- 6 Jawaid A, Woldemichael BT, Kremer EA, *et al.* Memory Decline and Its Reversal in Aging and Neurodegeneration Involve miR-183/96/182 Biogenesis. *Mol Neurobiol* 2019;**56**:3451–62. doi:10.1007/s12035-018-1314-3
